**A *Very Oil Yellow1* modifier of the *Oil Yellow1-N1989* allele uncovers a cryptic phenotypic impact of cis-regulatory variation in maize**

Rajdeep S. Khangura<sup>†</sup>, Sandeep Marla<sup>†1</sup>, Bala P. Venkata<sup>†2</sup>, Nicholas J. Heller<sup>†3</sup>,  
Gurmukh S. Johal<sup>†‡</sup>, Brian P. Dilkes<sup>§‡4</sup>

<sup>†</sup>Department of Botany and Plant Pathology, Purdue University, West Lafayette, Indiana 47907

<sup>‡</sup>Center for Plant Biology, Purdue University, West Lafayette, Indiana 47907

<sup>§</sup>Department of Biochemistry, Purdue University, West Lafayette, Indiana 47907

Current address

<sup>1</sup>Department of Agronomy, Kansas State University, Manhattan, Kansas 66506

<sup>2</sup>Donald Danforth Plant Science Center, St. Louis, Missouri 63132

<sup>3</sup>Department of Crop Sciences, University of Illinois, Urbana, IL 61801

<sup>4</sup>Corresponding Author

Brian Dilkes, 170 S University Ave, Purdue University, West Lafayette, Indiana 47907,  
phone: (765) 494 2584, Email: [bdilkes@purdue.edu](mailto:bdilkes@purdue.edu)

## Abstract

Forward genetics determines the function of genes underlying trait variation by identifying the change in DNA responsible for changes in phenotype. Detecting phenotypically-relevant variation outside protein coding sequences and distinguishing this from neutral variants is not trivial; partly because the mechanisms by which DNA polymorphisms in the intergenic regions affect gene regulation are poorly understood. Here we utilized a dominant genetic marker with a convenient phenotype to investigate the effect of cis and trans-acting regulatory variation. We performed a forward genetic screen for natural variation that suppress or enhance the semi-dominant mutant allele *Oy1-N1989*, encoding the magnesium chelatase subunit I of maize. This mutant permits rapid phenotyping of leaf color as a reporter for chlorophyll accumulation, and mapping of natural variation in maize affecting chlorophyll metabolism. We identified a single modifier locus segregating between B73 and Mo17 that was linked to the reporter gene itself, which we call *very oil yellow1*. Based on the variation in OY1 transcript abundance and genome-wide association data, *vey1* is predicted to consist of multiple cis-acting regulatory sequence polymorphisms encoded at the wild-type *oy1* alleles. The *vey1* allele appears to be a common polymorphism in the maize germplasm that alters the expression level of a key gene in chlorophyll biosynthesis. These *vey1* alleles have no discernable impact on leaf chlorophyll in the absence of the *Oy1-N1989* reporter. Thus, use of a mutant as a simple and efficient reporter for magnesium chelatase activity resulted in the detection of expression-level polymorphisms not readily visible in the laboratory.

**KEYWORDS** chlorophyll biosynthesis; cryptic variation; cis-acting; complex traits; epistasis

## 1 **Introduction**

2 Genetic variation in the coding or regulatory sequences causes differences between  
3 genotypes and is fundamental to crop improvement (Springer and Stupar 2007). Gene  
4 function discovery via mutant analyses focuses on linking phenotype alterations to gene  
5 variants. As a result, forward genetics has been of great value to understand biological  
6 systems but is predominantly useful for determining functions for genes with alleles that  
7 cause large phenotypic impacts. Natural variants, including those that encode alleles of  
8 relevance to adaptation and fitness of the organism, are often of small effect (Fisher 1930;  
9 Orr 1998, 2005). Mutant alleles with conditional impacts on phenotypes, through genetic  
10 interactions or modifiers, as well as alleles of small individual effect are difficult to study.  
11 Further, even if we identify loci that have not been previously associated with a biological  
12 process, it can be difficult to validate and associate such natural variants with physiological  
13 and biochemical mechanisms.

14 A forward genetics approach that uses a mutant phenotype as a reporter for genetic  
15 interactions can be used to detect modifiers in natural populations and expose cryptic  
16 variation affecting traits of interest (Johal *et al.* 2008). This Mutant-Assisted Gene  
17 Identification and Characterization (MAGIC) approach is particularly efficient in species  
18 where outcrossing is easy, such as maize (*Zea mays*). It can be applied to any mutant with  
19 any quantifiable phenotype to expand our understanding of the process disrupted by  
20 mutation. This approach is convenient when a dominant mutant allele is used as a reporter  
21 because natural variants that encode enhancers or suppressors of a given mutant phenotype  
22 can be detected in F<sub>1</sub> crosses. Thus, it enables easy detection of dominant enhancers and  
23 suppressors. Any germplasm collection, diversity panel, or line-cross population that can  
24 serve as the variable parents in these crosses, can be utilized to detect and map loci that  
25 alter mutant phenotype expression. Natural variants discovered this way have an  
26 experimental link (genetic modifiers) of the processes affected by the mutant reporter allele  
27 (induced variation). Thus, this approach speeds the assignment of mechanism(s) to natural  
28 variation in the germplasm. Indeed, one can consider this as a screen for epistatic or  
29 contingent gene action. MAGIC screens have identified loci from maize involved in the  
30 hypersensitive response (Chintamanani *et al.* 2010; Penning, Johal, and McMullen 2004;  
31 Olukolu *et al.* 2013, 2014, 2016) and plant development (Buescher *et al.* 2014), among

32 others. In each case, in the absence of a mutant allele, no phenotype was previously  
33 associated to the modifier loci demonstrating the remarkable efficiency of this genetic  
34 screen to detect epistatic interactions between mutant and modifier alleles. Thus, this  
35 approach is a powerful way to both characterize cryptic variation in genomes and construct  
36 genetic pathways affecting phenotypes of interest.

37         The easy visual scoring and simplicity of quantifying chlorophyll make chlorophyll  
38 biosynthetic mutants an excellent reporter for MAGIC screens. Chlorophyll is a major  
39 component of central metabolism in plants, which can produce phototoxic intermediates  
40 during both synthesis (Hu *et al.* 1998; Huang *et al.* 2009) and breakdown (Gray *et al.* 1997;  
41 Gray *et al.* 2002; Mach *et al.* 2001; Yang *et al.* 2004), and its levels are carefully regulated  
42 in plants (Meskauskiene *et al.* 2001). Enzymatic conversion of protoporphyrin IX into  
43 magnesium protoporphyrin IX by Magnesium Chelatase (MgChl) is the first committed  
44 step in chlorophyll biosynthesis (Wettstein *et al.* 1995). MgChl is a hetero-oligomeric  
45 enzyme consisting of three subunits (I, D, and H) that are conserved from prokaryotes to  
46 plants. The MgChl subunit I is encoded by the *oil yellow1* (*oy1*; GRMZM2G419806) gene  
47 in maize and encodes the AAA<sup>+</sup>-type ATPase subunit that energizes the complex (Fodje *et al.*  
48 *et al.* 2001). Weak loss-of-function alleles of *oy1* result in recessive yellow-green plants while  
49 complete loss-of-function alleles result in a recessive yellow seedling-lethal phenotype  
50 (Sawers *et al.* 2006). The semi-dominant *Oy1-N1989* allele carries a leucine (L) to  
51 phenylalanine (F) change at amino acid position 176 (L176F) that hinders the formation of  
52 a functional complex between the OY1 protein and other subunits of MgChl. Heterozygous  
53 plants carrying one *Oy1-N1989* allele and one wild-type allele are oil-yellow, but  
54 homozygous *Oy1-N1989* plants lack any MgChl activity, resulting in a recessive yellow  
55 seedling-lethal phenotype with no chlorophyll accumulation (Sawers *et al.* 2006).  
56 Consistent with the conservation of this protein complex, the orthologous L->F mutation  
57 (encoded by *Oy1-N1989*) was identified in barley (L161F) and also results in a recessive  
58 yellow seedling-lethal phenotype with no detectable chlorophyll in homozygous condition  
59 and a pale-green phenotype as a heterozygote (Hansson *et al.* 1999). The biochemical basis  
60 of this semi-dominant mutant allele was studied by creating a mutant MgChl subunit I in  
61 *Rhodobacter* (BCHI), with the orthologous amino acid change at position 111 of wild-type  
62 BCHI (Hansson *et al.* 2002). The L111F mutation converted BCHI into a competitive



63 inhibitor of MgChl that reduced enzyme activity by 4-fold when mixed 1:1 with wild-type  
64 BCHI (Hansson *et al.* 2002; Lundqvist *et al.* 2013). This conserved leucine residue is  
65 between the ATP-binding fold of MgChl subunit I created by the Walker A and B motifs  
66 (Hansson *et al.* 2002; Sawers *et al.* 2006; Lundqvist *et al.* 2013), and its substitution with  
67 phenylalanine was deleterious to dephosphorylation activity. The ATPase activity of wild-  
68 type MgChl complex is directly proportional to the magnesium chelation reaction.  
69 However, complexes assembled from MgChl subunit I with the L->F change exhibit  
70 reduced ATPase activity and no ability to chelate Mg<sup>2+</sup> ions into protoporphyrin IX  
71 (Hansson *et al.* 1999, 2002; Sawers *et al.* 2006). The absence of MgChl activity displayed  
72 by the mutant BCHI carrying L111F substitution (BCHI<sup>L111F</sup>) demonstrates that this amino  
73 acid change results in a dominant-negative subunit which disrupts the coupling of ATPase  
74 activity to magnesium chelation (Hansson *et al.* 2002; Lundqvist *et al.* 2013).

75 We screened maize germplasm for cryptic variation using the *Oy1-N1989* mutant  
76 as a dominant reporter for chlorophyll biosynthesis. We hypothesized that alteration in the  
77 quantity of biochemically active MgChl complex should read out as a change in  
78 chlorophyll content and plant color in heterozygous *Oy1-N1989* mutants. For instance, in  
79 a population of heterozygous *Oy1-N1989/oy1* F<sub>1</sub> plants, an amino acid change in the wild-  
80 type OY1 protein that alters the dissociation constant (k<sub>D</sub>) of OY1 for the other protein  
81 subunits of MgChl should contribute to variance in chlorophyll biogenesis. Similarly, a  
82 cis-acting expression QTL (eQTL) that increases expression of the wild-type *oy1* allele  
83 should result in assembly of more active MgChl complexes and increase chlorophyll  
84 content in F<sub>1</sub> mutant plants. Thus, chlorophyll content of *Oy1-N1989* mutants should be  
85 modulated by the stoichiometry of both the wild-type and mutant OY1 proteins present in  
86 the MgChl complex in heterozygous *Oy1-N1989/oy1* plants either by protein structure or  
87 abundance changes.

88 We introgressed the maize *Oy1-N1989* mutant allele into the B73 inbred  
89 background and maintained it as a heterozygote (*Oy1-N1989/oy1*:B73). While crossing this  
90 mutant to multiple backgrounds, we detected genetic variation in the *Oy1-N1989/oy1*  
91 mutant phenotype expression between the maize inbred lines B73 and Mo17. The  
92 phenotype of the *Oy1-N1989* mutant heterozygotes was suppressed in the B73 background.  
93 However, F<sub>1</sub> hybrids with Mo17 dramatically enhanced it. In an attempt to determine the

94 genetic basis of this modification, we carried out genetic mapping experiments using five  
95 F<sub>1</sub> populations. In each of these mapping experiments, the *Oy1-N1989/oy1*:B73 parents  
96 were crossed with (1) the intermated B73 x Mo17 recombinant inbred lines (IBM), (2) B73  
97 x Mo17 doubled haploid lines (Syn10), (3) Mo17 x B73 F<sub>1</sub> hybrids, (4) B73 x Mo17 near-  
98 isogenic lines (BM-NILs), and (5) a genome-wide association mapping panel of diverse  
99 maize inbred lines (MDL). In each case, we identified a quantitative trait locus (QTL) of  
100 large effect on chromosome 10 linked to the *oy1* locus itself. In each of the B73 x Mo17  
101 line-cross populations, the B73 wild-type allele at *oy1* suppressed the *Oy1-N1989/oy1*  
102 mutant phenotype. This QTL, which we call *very oil yellow1* (*vey1*), was not associated  
103 with changes in protein sequence at *oy1* and did not correlate with the chlorophyll content  
104 of the wild-type mapping parents. However, a cis-acting eQTL causing higher expression  
105 of the B73 allele of *oy1* in the IBM lines was consistent with the observed phenotypic  
106 variation in the mutant siblings. Consistently, the allele-specific expression at *oy1* in the  
107 mutant heterozygotes was biased towards the *Oy1-N1989* allele in the hybrids comprising  
108 wild-type *oy1* allele from Mo17. The inheritance of the traits, proposed allele expression  
109 bias at *oy1* due to a putative cis-acting regulatory element, implications of the discovered  
110 cryptic variation, and the utility of this study in general are discussed.

## 111 **Materials and Methods**

112

### 113 **Plant materials**

114 The *Oy1-N1989* mutant allele was acquired from the Maize Genetics Cooperation  
115 Stock Center (University of Illinois, Urbana-Champaign, IL). The original allele of the  
116 *Oy1-N1989* mutation was isolated from a *rl cl* colorless synthetic stock of mixed  
117 parentage (G. Neuffer, personal communication). This allele was introgressed into B73 for  
118 eight generations by repeated backcrossing of B73 ear-parents with *Oy1-N1989/oy1*  
119 pollen-parents and is maintained as a heterozygote (*Oy1-N1989/oy1*:B73) by crossing to  
120 wild-type siblings.

121 Line-cross QTL mapping: For these experiments, *Oy1-N1989/oy1*:B73 plants were  
122 crossed as pollen-parents to 216 Intermated B73 x Mo17 recombinant inbred lines (IBM;  
123 Lee *et al*, 2002) and 251 Syn10 doubled haploid lines (Syn10; Hussain *et al*, 2007). The

124 QTL validation was done using F<sub>1</sub> progenies derived from the cross of 35 B73-Mo17 Near-  
125 Isogenic lines (BM-NILs) ears with pollen from *Oy1-NI989/oy1*:B73. These BM-NILs  
126 consisted of 22 B73-like NILs and 13 Mo17-like NILs with introgression of the reciprocal  
127 parental genome (B73 or Mo17) and were developed by three repeated backcrosses into  
128 recurrent parent followed by four to six generations of self-pollination (Eichten *et al.* 2011).

129 Genome-wide association (GWA) mapping: For this experiment, *Oy1*-  
130 *NI989/oy1*:B73 plants were crossed to 343 inbred lines that included 249 inbreds from  
131 maize association panel (Flint-Garcia *et al.* 2005), and 94 inbred lines that included 82  
132 Expired Plant Variety Protections (ExPVP) lines from the Ames panel (Romay *et al.* 2013).  
133 Pollen from *Oy1-NI989/oy1*:B73 plants were used for these crosses except for the popcorn  
134 lines in the maize association panel, where *Oy1-NI989/oy1*:B73 plants were used as an  
135 ear-parent to avoid the crossing barrier affected by gametophytic factor GA1-S (first  
136 described by Correns in 1902; Mangelsdorf and Jones 1926; Lauter *et al.* 2017). This panel  
137 of 343 inbred lines is referred to as maize diversity lines (MDL). The full list of IBM,  
138 Syn10, BM-NILs, and MDL used to develop F<sub>1</sub> hybrid populations are provided in **Tables**  
139 **S1-S4**.

140

#### 141 **Field trials**

142 All field experiments were performed at the Purdue Agronomy Center for Research  
143 and Education (ACRE) in West Lafayette, Indiana. All F<sub>1</sub> populations described below  
144 were planted as a single plot of 12-16 plants that segregated for both mutant and wild-type  
145 siblings. Plots were sown in a 3.84 m long row with the inter-row spacing of 0.79 meters  
146 and an alley space of 0.79 meters. No irrigation was applied during the entire crop season  
147 as rainfalls were uniformly distributed for satisfactory plant growth. Conventional  
148 fertilizer, pest and weed control practices for growing field maize in Indiana were followed.  
149 Progenies of *Oy1-NI989/oy1*:B73 pollen-parents crossed with B73 and Mo17 were planted  
150 as parental checks in each block of every experiment. The testcross F<sub>1</sub> populations with  
151 IBM were evaluated in a single replication in the summer of 2013 with each range treated  
152 as a block. In 2016, the testcross F<sub>1</sub> populations with Syn10 lines were evaluated as two  
153 replications in a randomized complete block design (RCBD) with each range divided into  
154 two blocks. The testcross F<sub>1</sub> progenies with BM-NILs and parents (B73 and Mo17) were

155 planted in a RCBD with five replications in 2016. In the same year, F<sub>1</sub> populations with  
156 MDL were also evaluated with three replications planted in a RCBD. Each replication of  
157 MDL F<sub>1</sub> population was divided into ten blocks of the same size, and parental checks were  
158 randomized within each block.

159

## 160 **Phenotyping and data collection**

161 Maize seedlings used for destructive chlorophyll quantification were grown under  
162 greenhouse conditions using mogul base high-pressure sodium lamps (1000 Watts) as the  
163 supplemental light source for L:D cycle of 16:8 and temperature around 28°C (day-time)  
164 and 20°C (night-time). Destructive chlorophyll measurements were performed on the fresh  
165 weight basis in 80% acetone solution using a UV-VIS spectroscopic method described in  
166 Lichtenthaler & Buschmann, 2001.

167 For the field-grown experiments, mutant siblings in the suppressing genetic  
168 backgrounds were tagged at knee height stage with plastic tags so that they can be easily  
169 distinguished from the wild-type siblings for trait measurements at later developmental  
170 stages in the season. All the F<sub>1</sub> families segregated for the mutant (*Oy1-N1989/oy1*) and  
171 wild-type (*oy1/oy1*) siblings in approximately 1:1 fashion. For each F<sub>1</sub> family, two to four  
172 plants of each phenotypic class were picked at random for trait measurements. Non-  
173 destructive chlorophyll content in the maize leaves was approximated using a chlorophyll  
174 content meter model CCM-200 plus (Opti-Sciences, Inc., Hudson, NH) and the  
175 measurements were expressed as chlorophyll content index (CCM). Measurements were  
176 taken on the leaf lamina of the top fully expanded leaf at two time points. First CCM  
177 measurements were taken at 25-30 days after sowing (expressed as CCMI) and the second  
178 at 45-50 days after sowing (expressed as CCMII). For each trait, measurements were  
179 performed on both mutant (reported with a prefix MT) and wild-type (reported with a  
180 prefix WT) siblings. Besides using primary trait measurements of CCMI and CCMII on  
181 mutant and wild-type siblings, indirect CCM measurements were also calculated and  
182 expressed as ratios (MT/WT) and differences (WT-MT) of CCMI and CCMII. Phenotypic  
183 data of all the CCM traits in the F<sub>1</sub> populations with both bi-parental populations, BM-  
184 NILs and MDL are provided in **Tables S1-S4**.

185

## 186 **Public/open-access genotypic and gene expression data**

187 Public marker data for the IBM was obtained from [www.maizegdb.org](http://www.maizegdb.org) (Sen *et al.*  
188 2010). A total of 2,178 retrieved markers were reduced to 2,156 after the removal of  
189 markers with the duplicate assessment. Approximately 13.3% of the marker data were  
190 missing. The reads per kilobase of transcript per million mapped reads (RPKM) for the *oyl*  
191 locus were obtained from a public repository of the National Science Foundation grant  
192 (GEPR: Genomic Analyses of shoot meristem function in maize; NSF DBI-0820610;  
193 [https://ftp.maizegdb.org/MaizeGDB/FTP/shoot\\_apical\\_meristem\\_data\\_scanlon\\_lab/](https://ftp.maizegdb.org/MaizeGDB/FTP/shoot_apical_meristem_data_scanlon_lab/)).

194 These data consist of normalized read counts (expressed as RPKM) of the maize genes  
195 from the transcriptome of shoot apex of 14 days old IBM seedlings.

196 Marker data for Syn10 lines was obtained from Liu *et al.* 2015. The Syn10 lines  
197 were genotyped at 6611 positions (B73 RefGenV2) with SNP markers covering all ten  
198 chromosomes of maize. The entire set of markers were used for linkage analysis as there  
199 was no missing data. All B73-Mo17 NILs in both the B73 and Mo17 recurrent backgrounds  
200 that had introgression of the critical region from the opposite parent were selected for QTL  
201 validation. Genotyping data of the BM-NILs to choose informative lines and perform QTL  
202 validation was obtained from Eichten *et al.* 2011.

203 Genotypes for the MDL used in this study to perform GWA were obtained from  
204 third generation maize haplotypes (HapMap3) described in Bukowski *et al.* 2018. We  
205 identified 305 common inbred lines that were part of HapMap3. Briefly, HapMap3 consists  
206 of over 83 million variant sites across ten chromosomes of maize that are anchored to B73  
207 version 3 assembly. After obtaining the genotypic data of 305 common inbred lines, variant  
208 sites were filtered for  $\leq 10$  percent missing data and minor allele frequency of  $\geq 0.05$  using  
209 VCFtools (Danecek *et al.* 2011). The filtered SNP dataset was used for GWA analyses. A  
210 summary of variant sites before and after the filtering procedure are listed in **Table S5**. A  
211 reduced set of genotypes for the same set of 305 accessions were obtained from the maize  
212 inbred lines described in Romay *et al.* 2013. These genotypes consist of 681 257 SNPs  
213 (physical positions from B73 RefGenV2) obtained using a GBS protocol (Elshire *et al.*  
214 2011) covering all ten chromosomes of maize. This marker dataset was filtered for  $\leq 10$   
215 percent missing data and minor allele frequency of  $\geq 0.05$  using TASSEL (Bradbury *et al.*  
216 2007), reducing the marker number to 150 920 SNPs. This genotypic dataset was solely

217 used to compute principal components (PC) and a kinship matrix to control for population  
218 structure and familial relatedness in a unified mixed linear model, respectively (Yu *et al.*  
219 2006). GWA analyses using the reduced marker dataset (Romay *et al.* 2013) on the full set  
220 of MDL found similar results to the one by the larger marker dataset (HapMap3) on the  
221 reduced set of MDL (data not shown). To test for cis-eQTL at the *oy1* locus in the maize  
222 diversity lines used for GWA mapping, normalized count of OY1 expression derived from  
223 the germinating seedling shoots was obtained from <http://www.cyverse.org> (Kremling *et*  
224 *al.* 2018).

225

## 226 **Statistical analyses**

227 QTL mapping: Line-cross phenotypes and markers were used to detect and localize  
228 QTL using the R/QTL package version 1.40-8 (Broman *et al.* 2003). Trait means were used  
229 for the QTL analyses. Single interval mapping (SIM) was used for all traits, although  
230 composite interval mapping (CIM) was carried out with remarkably similar results (data  
231 not shown). Statistical thresholds were computed by 1000 permutations (Churchill and  
232 Doerge 1994) of each trait in both bi-parental F<sub>1</sub> populations.

233 Genome-wide association study (GWAS): Preliminary data analysis was done  
234 using JMP 13.0 (SAS Institute Inc. 2016). Statistical corrections on the raw phenotypic  
235 data were performed by determining the most significant terms in the model using analysis  
236 of variance (Fisher 1921). Genotype and replication were used as a random effect in a linear  
237 mixed-effects model built in the lme4 package (Bates *et al.* 2015) implemented in R (R  
238 core team, 2014) to calculate the best linear unbiased predictor (BLUP) for each trait.  
239 Broad-sense heritability (line mean basis) were calculated using BLUP values, using the  
240 method described by Lin and Allaire 1977. BLUP estimates for each trait were used to  
241 perform GWAS. GWAS was done using a compressed mixed linear model implemented  
242 in R package GAPIT (Lipka *et al.* 2012; Zhang *et al.* 2010). HapMap3 SNPs were used to  
243 calculate genotype to phenotype associations. As explained before, kinship and population  
244 structure estimates were obtained for the same population using the second subset of 150  
245 920 SNPs to correct for spurious associations. The Bonferroni correction and false  
246 discovery rate (FDR) adjustments were used to compute a statistical threshold for the



247 positive association to further control for false positive assessment of associations (Holm  
248 1979; Benjamini and Hochberg 1995).

249

## 250 **Molecular Analyses**

251 Genotyping: The recombinants in selected Syn10 lines and the BC<sub>1</sub>F<sub>1</sub> population  
252 were detected using three PCR-based markers. Two markers detecting insertion  
253 polymorphisms flanking the *oyl* locus and one dCAPS marker at *oyl* locus were designed  
254 for this purpose. Genotyping at insertion-deletion (indel) marker *ftcl1* (flanking an indel  
255 polymorphism in intron 4 of *ftcl1*; GRMZM2G001904) was performed with forward  
256 primer 5'- GCAGAGCTGGAATATGGAATGC-3' and reverse primer 5'-  
257 GATGACCTGAGTAGGGGTGC -3'. Genotyping at indel marker *gfa2* (flanking an indel  
258 polymorphism in the intron of *gfa2*; GRMZM2G118316) was performed with forward  
259 primer 5'- ACGGCTCCAAAAGTCGTGTA -3' and reverse primer 5'-  
260 ATGGATGGGGTCAGGAAAGC -3'. A polymorphic SNP in the second intron at *oyl*  
261 was used to design a dCAPS forward primer 5'- CGCCCCCGTTCTCCAATCCTGC -3'  
262 and a gene-specific reverse primer 5'- GACCTCGGGGCCCATGACCT -3'  
263 (<http://helix.wustl.edu/dcaps/dcaps.html>; Neff *et al.* 2002). The PCR products from  
264 polymerization reactions with the dCAPS oligonucleotide at *oyl* were digested by *Pst*I  
265 restriction endonuclease (New England Biolabs, MA, USA) and resolved on 3.5% agarose  
266 gel.

267 Allele-specific expression analyses: Allelic bias at transcriptional level was  
268 quantified using the third leaf of maize seedlings at the V3 developmental stage. Total  
269 RNA was extracted using a modified Phenol/Lithium chloride protocol (Eggermont *et al.*  
270 1996). The modification involved grinding of plant tissue in pestle and mortar into a fine  
271 powder using liquid nitrogen, instead of quartz sand and glass beads in the original  
272 protocol. Total RNA was subjected to DNase I treatment using Invitrogen Turbo DNA-  
273 free kit (Catalog#AM1907, Life Technologies, Carlsbad, CA) and 1 µg of DNase treated  
274 RNA from each sample was converted to cDNA using oligo dT primers and a recombinant  
275 M-MLV reverse transcriptase provided in iScript™ Select cDNA synthesis kit  
276 (catalog#170-8896, Bio-Rad, Hercules, CA) according to the manufacturer's  
277 recommendations. Besides the cDNA samples, genomic DNA samples were also prepared

278 as a control to test the sensitivity of the assay. Genomic DNA controls included a 1:1 (F<sub>1</sub>  
279 hybrid), 1:2, and 2:1 mixture of B73 and Mo17. PCR was conducted using gene-specific  
280 forward primer 5'- CAACGTCATCGACCCCAAGA -3' and reverse primer 5'-  
281 GGTTACCAGAGCCGATGAGG -3' for 30 cycles (94° for 30s, 56° for 30s, 72 ° for 30s  
282 and final extension for 2 minutes) to amplify the OY1 gene product. These primers flank  
283 SNP252 (C->T), which is the causative mutation of *Oy1-NI989*, and SNP317 (C->T)  
284 which is polymorphic between B73 and Mo17 but monomorphic between the B73 and  
285 *Oy1-NI989* genetic backgrounds. Corresponding PCR products were used to generate  
286 sequencing libraries using transposon-mediated library construction with the Illumina  
287 Nextera® DNA library preparation kit, and sequence data were generated on a MiSeq  
288 instrument (Illumina, San Diego, CA) at the Purdue Genomics Core Facility. The SNP  
289 variation and read counts were decoded from the sequenced PCR amplicons by alignment  
290 of the quality controlled reads to the *oy1* reference allele from B73 using the BMAP  
291 (Bushnell 2014) and the GATK packages (DePristo *et al.* 2011). Additional analysis was  
292 performed using IGV (Robinson *et al.* 2011) to manually quality-check the alignments and  
293 SNP calls. Read counts at polymorphic sites obtained from GATK was used to calculate  
294 allele-specific expression. Genomic DNA control samples showed bias in the read counts  
295 in a dosage-dependent manner. DNA from F<sub>1</sub> hybrids between B73 and Mo17 resulted in  
296 1:1 reads at *oy1* demonstrating no bias in the assay to quantify expression.

297 OY1 sequencing: The coding sequence of the *oy1* locus from B73, Mo17, W22,  
298 and *Oy1-NI989* homozygous seedlings was obtained from the genomic DNA using PCR  
299 amplification. For the rest of the maize inbred lines, the *oy1* locus was amplified from  
300 cDNA synthesized from total RNA derived from the shoot tissue of 14 days old maize  
301 seedlings. PCR amplification of *oy1* locus from genomic DNA was performed using four  
302 primer pairs: (a) forward primer Oy1-FP1 5'- GCAAGCATGTTGGGCACAGCG -3' and  
303 reverse primer Oy1-RP12 5'- GGGCGGCGGGATTGGAGAAC -3', (b) forward primer  
304 Oy1-FP5 5'- GGTGGAGAGGGAGGGTATCT -3' and reverse primer Oy1-RP6 5'-  
305 GGACCGAGGAAATACTTCCG -3', (c) forward primer Oy1-F8 5'-  
306 ATGCCCTTCTTCCTCTCCT -3' and reverse primer Oy1-R8 5'-  
307 CGCCTTCTCGATGTCAATGG -3', (d) forward primer Oy1-F9 5'-  
308 GGCACCATTGACATCGAGAA -3' and reverse primer Oy1-R9 5'-



309 GCTGTCCTTCCTTTCAACG -3'. PCR amplification of OY1 transcripts from cDNA  
310 was performed using all primer pairs except Oy1-FP1/RP12. The PCR products from these  
311 samples were sequenced either using Sanger or Illumina sequencing. For Sanger  
312 sequencing, amplified PCR products were cleaned using homemade filters with sterile  
313 cotton plug and Bio-Gel<sup>®</sup> P-30 gel (Bio-Rad, Hercules, CA) to remove unused dNTPs and  
314 primers. Cleaned PCR products were used to perform a cycle reaction using Big Dye  
315 version 3.1 chemistry (Applied Biosystems, Waltham, MA) and run on ABI 3730XL  
316 sequencer by Purdue genomics core facility. Read with high-quality base pairs from Sanger  
317 sequencing were aligned using ClustalW (Thompson *et al.* 1994). Illumina sequencing was  
318 performed as described above except in this case paired-end reads were aligned to the B73  
319 reference of *oy1* gene using bwa version 0.7.12 (Li and Durbin 2009) and variant calling  
320 was done using Samtools (Li *et al.* 2009).

321

## 322 **Results**

323

### 324 **Mo17 encodes an enhancer of the semi-dominant mutant allele *Oy1-N1989* of maize**

325 The *Oy1-N1989* allele was recovered from a nitrosoguanidine mutant population in  
326 mixed genetic background. The molecular nature of the mutation is a single non-  
327 synonymous base pair change (Sawers *et al.* 2006). Heterozygous *Oy1-N1989* plants have  
328 the eponymous oil-yellow color but are reasonably vigorous and produce both ears and  
329 tassels. During introgression of the semi-dominant *Oy1-N1989* allele into B73 and Mo17  
330 inbred backgrounds, we observed a dramatic suppression of the mutant phenotype in F<sub>1</sub>  
331 crosses of the mutant stock (obtained from Maize COOP) to the B73 background. In  
332 contrast, crosses to Mo17 enhanced the mutant phenotype. The difference in phenotype  
333 expression was stable and persisted in both genetic backgrounds through all six backcross  
334 generations observed to date. To further explore and quantify this suppression, B73, Mo17,  
335 as well as *Oy1-N1989/oy1*:B73, crossed with each of these inbred lines were grown to the  
336 V3 stage in the greenhouse. To improve upon our visual assessment of leaf color and  
337 provide quantitation, optical absorbance was measured using a Chlorophyll Content Meter-  
338 200 plus (CCM; Opti-Sciences, Inc), a hand-held LED-based instrument. CCM is predicted  
339 to strongly correlate with chlorophyll and carotenoid contents. To confirm that our rapid

340 phenotyping with the CCM would accurately assess chlorophyll levels, we measured these  
341 pigments using a UV-VIS spectrophotometer following destructive sampling of the same  
342 leaves used for CCM measurements. The non-destructive CCM measurements and  
343 destructive pigment quantification using UV-VIS protocol displayed a strong positive  
344 correlation with an  $R^2$  value of 0.94 for *chl<sub>a</sub>*, *chl<sub>b</sub>*, and total chlorophyll (**Figure S1**). Given  
345 this high correlation of maize leaf greenness between the rapid measurement using CCM-  
346 200 plus instrument and absolute pigment contents quantified using UV-VIS  
347 spectrophotometer (destructive sampling), we performed all chlorophyll measurements of  
348 *Oy1-NI989* enhancement discussed in later results using CCM values.

349 In the greenhouse grown seedlings, we observed no visible chlorophyll  
350 accumulation in the *Oy1-NI989* homozygotes using CCM or spectrophotometric method.  
351 In wild-type plants, CCM measurements were slightly higher in B73 than Mo17, but the  
352 spectrophotometric method did not identify any significant difference in the amount of  
353 chlorophyll *a* (*chl<sub>a</sub>*), chlorophyll *b* (*chl<sub>b</sub>*), total chlorophyll, or carotenoids between these  
354 two genotypes (**Table S6**). We detected a mild parent-of-origin-effect for both CCM and  
355 absolute amounts of *chl<sub>a</sub>*, *chl<sub>b</sub>*, total chlorophyll, and carotenoids in the wild-type siblings  
356 of our F<sub>1</sub> crosses. These plants had slightly higher chlorophyll accumulation when B73 was  
357 used as the pollen parent (**Table S6**). However, no such effect of parent-of-origin was  
358 observed for the mutant heterozygotes (*Oy1-NI989/oy1*) and reciprocal hybrid  
359 combinations of crosses between *Oy1-NI989/oy1*:B73 and Mo17 were indistinguishable.  
360 Further, both CCM and absolute chlorophyll contents were higher in the *Oy1*-  
361 *NI989/oy1*:B73 plants compared to the mutants in B73 x Mo17 hybrid background. Thus,  
362 there was a strong effect of genetics on chlorophyll pigment variation in mutants, that went  
363 opposite to predictions for hybrid vigor.

364 Heterozygous maize plants encoding the *Oy1-NI989* allele display reduced  
365 chlorophyll pigment abundance compared to the wild-type siblings, resulting in a yellow-  
366 green whole plant phenotype due to reduced MgChl and ATPase activity (Sawers *et al.*  
367 2006). We tested the progenies from the crosses of *Oy1-NI989/oy1*:B73 with B73 and  
368 Mo17 inbred lines in the field. Consistent with our previous observation, B73 inbred  
369 background resulted in substantially greener mutant heterozygotes (*Oy1-NI989/oy1*) than  
370 mutant siblings in the Mo17 x B73 F<sub>1</sub> hybrid background (**Figure 1, Table S7**). The

371 increased severity of *Oy1-N1989* heterozygotes in the Mo17 genetic background was  
372 observed even after six backcrosses (**Figure S2**). No suppressed mutant plants were  
373 observed during any generation of backcrossing into Mo17 (data not shown). Thus, these  
374 results demonstrate the profound negative impact of the *Oy1-N1989* allele on chlorophyll  
375 pigment accumulation and the dramatic differential suppression response of this allele by  
376 B73 and Mo17 genetic backgrounds.

377

378 ***vey1* maps to a single locus that co-segregates with the *oy1* allele of Mo17 in DH,**  
379 **RIL, BC<sub>1</sub>F<sub>1</sub> and NIL families derived from B73 and Mo17**

380 To identify the genetic basis of the suppression of heterozygotes with the *Oy1-*  
381 *N1989* allele in B73, we performed a series of crosses to four mapping populations. In each  
382 case, we crossed a B73 line into which we have introgressed *Oy1-N1989* allele in  
383 heterozygous condition (*Oy1-N1989/oy1*:B73) as a pollen-parent to a population of  
384 recombinant lines as ear-parent (**Figure 2**). We chose two public populations to map all  
385 modifiers altering the severity of the *Oy1-N1989* phenotypes. The IBM is a publicly  
386 available RIL population that has been extensively used by the maize community for a  
387 variety of mapping experiments (Lee *et al.* 2002). A second intermated B73 x Mo17  
388 population Syn10 is derived from ten rounds of intermating followed by fixing alleles using  
389 double haploid process (Hussain *et al.* 2007). IBM and Syn10 differ in the number of  
390 rounds of intermating, and therefore vary in the number of recombinants captured and  
391 genetic resolution of trait localization. Each F<sub>1</sub> progeny of the testcross with *Oy1-*  
392 *N1989/oy1*:B73 pollen-parent segregated approximately 1:1 for wild-type (*oy1/oy1*) and  
393 mutant heterozygote (*Oy1-N1989/oy1*) in the hybrid genetic background with B73. In the  
394 mutant heterozygote siblings of both (IBM and Syn10) F<sub>1</sub> populations, chlorophyll  
395 approximation using CCM measured at an early (CCMI) and late (CCMII) developmental  
396 stages displayed bimodal trait distributions (**Figures 3a and 3b; Figures S3 and S4**), and  
397 there was no overlap between the wild-type and mutant CCM distribution (**Figures S5a**  
398 **and S5b**). Moreover, mutant siblings alone in these F<sub>1</sub> populations with IBM and Syn10  
399 displayed bimodality for CCM measurements, suggesting segregation of a single,  
400 effectively Mendelian, suppressor locus (**Figures 3a and 3b**). We name this suppressor  
401 locus *very oil yellow1* (*vey1*). CCM values collected at two different times (CCMI and

402 CCMII) in the wild-type F<sub>1</sub> siblings show positive correlations in both F<sub>1</sub> populations  
403 (**Tables S8 and S9; Figures S3 and S4**). Similar trend was also observed for the CCMI  
404 and CCMII in the mutant F<sub>1</sub> siblings. However, CCM measurements in the wild-type and  
405 mutant displayed statistically insignificant correlations with each other. This suggests that  
406 higher chlorophyll accumulation in the mutant siblings is not predicted by the amount of  
407 chlorophyll accumulation in the wild-type siblings. To control for variation in CCM  
408 observed due to the genetic potential of each line that was independent of the *Oy1-N1989*  
409 modification, we divided the mutant CCM trait values by the congenic wild-type sibling  
410 CCM values to derive ratio for both time points. We also calculated differences between  
411 congenic wild-type and mutant CCM values. Each of the direct measurements, as well as  
412 the ratio-metric and difference values, were used as phenotypes to detect and localize QTL.

413 QTL mapping was carried out on all traits using single interval mapping by the EM  
414 algorithm as implemented in R/qtl (Broman *et al.* 2003). Summary of the peak positions  
415 of all QTLs passing a permutation computed threshold are presented in **Table S10** for the  
416 IBM F<sub>1</sub> populations and **Table S11** for the Syn10 F<sub>1</sub> populations. All mutant CCM traits,  
417 all mutant to wild-type CCM ratios, and all differences between mutant and wild-type  
418 CCM measurements identified *vey1* as a QTL of large effect on chromosome 10. A plot of  
419 the log<sub>10</sub> of odds (LOD) score and permutation calculated threshold for CCMII from the  
420 mutant siblings in the Syn10 F<sub>1</sub> population is plotted in **Figures 3c and 3d**. Other mutant-  
421 related traits in Syn10 and IBM F<sub>1</sub> populations produced similar plots (data not shown).  
422 The magnitude of the effects of *vey1* genetic position on all of the traits in the mutant  
423 siblings, particularly the effects on CCMI and CCMII, were consistent with the prediction  
424 of a single Mendelian locus controlling the majority of the phenotypic variance in these  
425 traits based on trait distributions (**Figure 3a and 3b**). Only one additional minor effect  
426 QTL was identified that influenced the wild-type CCMI. This QTL was only found in the  
427 IBM F<sub>1</sub> population (**Table S10**). No QTL affecting the chlorophyll accumulation of wild-  
428 type siblings were detected at the position of *vey1*, or anywhere else in the genome.  
429 Interestingly, *vey1* mapped to the same genetic position as *oy1* locus itself (**Figures 3e and**  
430 **3f**). These analyses indicate that the *vey1* QTL encodes a single locus with an effect  
431 contingent upon the allelic status at *oy1* responsible for the suppression of *Oy1-N1989* in  
432 these populations.

433           The identification of the *vey1* modifier as a single Mendelian locus of large effect  
434 in the presence of the *Oy1-N1989* allele suggested that we could take a similar approach to  
435 localization as for a previous metabolic QTL (Li *et al.* 2014). Thus, we classified each F<sub>1</sub>  
436 mutant hybrid in Syn10 F<sub>1</sub> population as high or low CCMII by using the bimodal  
437 distribution to assign lines into phenotypic categories. We then compared the marker  
438 genotypes at each marker under *vey1* with the phenotypic categories. **Table S12** shows the  
439 mutant trait values, marker genotypes, and phenotypic categories for the nine F<sub>1</sub> Syn10  
440 lines with recombinants within the *vey1* region (between the flanking markers 10.90.5 and  
441 10.95.5). Because of the high penetrance of the CCM trait, we interpret a discordance  
442 between the marker genotype and F<sub>1</sub> mutant phenotype for high and low CCMII  
443 categorization as recombination between *vey1* and that marker. A summary of the  
444 recombinant data across the *vey1* flanking markers and additional markers with the  
445 physical position of each marker annotated by the number of instances of discordance  
446 between the markers and the phenotypic class is presented in **Figures 3e and 3f**. Genotypes  
447 at marker 10.93 perfectly predicted CCMII trait expression in Syn10 F<sub>1</sub> mutant siblings.  
448 Recombinants separated the trait outcome from the marker genotype in one Syn10 line at  
449 marker 10.94.5 and two Syn10 lines at 10.90.5, indicating that the QTL resides in ~227kb  
450 interval between markers 10.94.5 and 10.90.5 (**Figure 3e**). This physical position includes  
451 the *oy1* locus itself, suggesting that *vey1* may be encoded by the Mo17 allele of *oy1* which  
452 enhances the impact of the *Oy1-N1989* allele. In the three Syn10 lines that contained  
453 recombination within this critical region, the genotype at *oy1* matched mutant CCM trait  
454 values perfectly. To improve the resolution of *vey1* localization we developed additional  
455 markers in the region. The genotypes at polymorphic indel markers were determined for  
456 the Syn10 recombinants. One marker was encoded by the *ftcl1* locus, two genes towards  
457 the telomere from *oy1* and the second, was encoded by *gfa2*, one gene towards the  
458 centromere. No recombinants were detected between an indel marker in the proximal end  
459 of the *gfa2* gene and *vey1*, although marker 10.94.5 from the Syn10 population is at the  
460 distal end of the *gfa2* gene and did show one recombinant (**Figure 3e**). Three recombinants  
461 were identified that separated the *ftcl1* marker from the *vey1* QTL. As a result, *vey1* could  
462 be encoded by the genomic region between *ftcl1* and *gfa2*. This region includes *oy1*, *ereb28*

463 (GRMZM2G544539), the small regions of *gfa2* (from marker 10.94.5), and *ftcll* proximate  
464 to *oyl*.

465 A similar fine mapping approach was adopted for the data from the F<sub>1</sub> crosses to  
466 the IBM. Mutant CCMII readings were used to bin IBM F<sub>1</sub> population into suppressed and  
467 enhanced categories. The number of cases of discordance between each marker genotype  
468 in the *veyI* region and the F<sub>1</sub> mutant phenotypic class is summarized in **Figure 3f**. For all  
469 IBM with unambiguous genotypes, the *OyI-NI989* suppression or enhancement phenotype  
470 was correctly predicted by marker genotypes at isu085b. A single recombinant between  
471 phenotype and genotype was identified for the flanking marker phi059 which is ~372 kb  
472 from the *oyl* locus (towards the telomere). Twenty-seven recombinants between the  
473 phenotype and genotype were noted for the marker umc2069 which is ~3.14 Mb from *oyl*  
474 (towards the centromere). This analysis identified an ~3.51 Mbp window in IBM  
475 containing *veyI* on chromosome 10 providing a confirmation of the Syn10 results with no  
476 additional resolution. We attempted to generate additional recombinants by generating a  
477 population of ~1100 BC<sub>1</sub>F<sub>1</sub> plants from (B73 x Mo17) x *OyI-NI989/oyl*:B73 crosses. All  
478 the mutant siblings from this population (n=576) were separated into suppressed and  
479 enhanced phenotype categories by CCM readings and genotyped at *ftcll*, *oyl*, and *gfa2*. In  
480 a sample of 576 mutants, we identified three recombinants between *veyI* and *ftcll* indel  
481 marker, whereas, no recombinant at *oyl* and *gfa2* were detected (**Figure 3e**). Thus, we  
482 could not further narrow down this QTL interval.

483 To validate the *veyI* locus, we made crosses between *OyI-NI989/oyl* in the B73  
484 background and a series of BM-NILs that contained the *veyI* QTL region introgressed into  
485 a homogeneous background of either B73 or Mo17. These BM-NILs also displayed the  
486 bimodal effect observed in the QTL experiment, but now without additional segregating  
487 B73 and Mo17 alleles. This bimodality was still visible in crosses of *OyI-NI989* mutant to  
488 NILs that used B73 as the recurrent parent to test the *veyI* QTL in an otherwise inbred B73  
489 background demonstrating that a hybrid background was not necessary for *veyI* expression  
490 (**Figure S6 and Table S3**). We also observed an increase in the mutant CCM in F<sub>1</sub> hybrids  
491 of *OyI-NI989/oyl*:B73 with NILs that used Mo17 as a recurrent parent but had B73  
492 introgression at *veyI* locus. Thus, our NIL data confirm the expectation of the QTL  
493 mapping and validates the existence of the *veyI* modifier. The recombinants in the BM-



494 NILs were sufficient to identify an ~3.01 Mb region that must contain the *vey1* QTL, but  
495 this did not further narrow the region from the four gene window which included the *oy1*  
496 locus itself, identified in the Syn10 F<sub>1</sub> population.

497 Thus, the formal list of candidate genes for the *vey1* QTL is the *oy1* gene itself and  
498 the three most closely linked loci. Locus *ftcl1* is annotated as a 5-formyl tetrahydrofolate  
499 cyclo-ligase1, which is involved in folate metabolism. The ortholog of *Zmftcl1* (~62%  
500 protein identity) from *Arabidopsis thaliana* has been shown to be localized in the  
501 chloroplast and T-DNA insertion knockouts are embryo lethal (Pribat *et al.* 2011). The  
502 maize gene *gfa2* is uncharacterized, but mutation of the *Arabidopsis* ortholog caused  
503 defects in megagametogenesis including failures of polar nuclear fusion in the female  
504 gametophyte and synergid cell-death at fertilization (Christensen *et al.* 2002; Christensen,  
505 Subramanian, and Drews 1998). The third linked gene, *ereb28* (Apetela2-Ethylene  
506 Responsive Element Binding Protein-transcription factor 28) exhibits poor homology to  
507 other plant species but has a highly conserved AP2/EREB domain. This gene has a very  
508 low expression level and is localized only to the root tissue of maize  
509 ([https://www.maizegdb.org/gene\\_center/gene?id=GRMZM2G544539#rnaseq](https://www.maizegdb.org/gene_center/gene?id=GRMZM2G544539#rnaseq)).

510

511 **Controlling for the *vey1* QTL neither detected additional epistatic interactions with**  
512 ***vey1* nor *Oy1-N1989* phenotype expression**

513 The non-normality of some of the trait distributions and apparent thresholds  
514 prompted us to explore additional QTL models. No additional QTL were recovered by  
515 implementing two-part threshold models (Broman *et al.* 2003) for any of the traits (data  
516 not shown). This observation is consistent with a single major QTL affecting the non-  
517 normality in the phenotypic data and normal distribution of residuals remaining after single  
518 marker regressions (data not shown). Similarly, two-way scans of the genome also failed  
519 to detect any statistically significant genetic interactions. It is worth noting that in both the  
520 IBM and the Syn10, the region encoding *vey1* exhibited substantial segregation distortion  
521 with the B73:Mo17 alleles present at 120:72 in the IBM and 175:76 in the Syn10  
522 population. This uneven sample size will reduce the power to detect epistasis with *vey1* but  
523 would not limit the detection of additional unlinked epistatic modifiers of *Oy1-N1989*.

524 We used the top marker at *vey1* as a covariate to control for the contribution of this  
525 allele to phenotypic variation and performed a one-dimensional scan of the genome  
526 (Broman *et al.* 2003). In our previous naïve one-dimensional scans, the large effect of *vey1*  
527 partitioned into the error term and might reduce our power to detect additional unlinked  
528 QTL(s). By adding a marker linked to *vey1* as a covariate, this term will capture the  
529 variance explained by *vey1* and should improve detection of additional QTL(s) of  
530 presumably smaller effect. Use of *vey1* linked marker as a covariate, in both IBM and  
531 Syn10 F<sub>1</sub> populations, did not identify any additional QTL for any trait (data not shown).  
532 Thus, modification of the *Oy1-N1989* phenotype by *vey1* was inherited as a single QTL,  
533 acting alone.

534

### 535 **GWAS for chlorophyll content in maize diversity lines and *Oy1-N1989/oy1* F<sub>1</sub>** 536 **genotypes identifies *vey1***

537 We undertook GWA mapping of *Oy1-N1989* severity to search for additional loci  
538 and potentially identify recombinants at *vey1*. A population of 343 lines including members  
539 of the maize association panel (Flint-Garcia *et al.* 2005) and the Ames panel including  
540 ExPVPs (Romay *et al.* 2013) were crossed to *Oy1-N1989/oy1*:B73. This procedure  
541 generated MDL x *Oy1-N1989/oy1*:B73 F<sub>1</sub> populations segregating 1:1 for mutant and wild-  
542 type siblings in hybrid genetic background. There was total separation between mutant and  
543 wild-type siblings in the MDL F<sub>1</sub> populations for the CCMI and CCMII traits (**Figure S5c**).  
544 Additionally, dramatically enhanced mutant F<sub>1</sub> families, similar to the F<sub>1</sub> progeny of Mo17  
545 x *Oy1-N1989/oy1*:B73, were present within the MDL F<sub>1</sub> populations (**Figure S7**). Pairwise  
546 correlations of the CCM trait measurements at two-time points (CCMI and CCMII) in the  
547 wild-type siblings displayed statistically significant positive relationship (**Table S13**).  
548 CCM traits were much more strongly correlated in the mutant F<sub>1</sub> siblings, similar to the  
549 B73 x Mo17 F<sub>1</sub> populations. However, weak positive correlations were also observed  
550 between mutant and wild-type CCM measurements in the MDL F<sub>1</sub> populations. Broad-  
551 sense heritability estimates were also calculated in the MDL F<sub>1</sub> population. The chlorophyll  
552 estimates of the leaves (CCMI and CCMII) showed very high heritability for the mutant  
553 and ratio traits, whereas wild-type siblings had much lower repeatability (**Table S14**).



554 GWA was performed using the HapMap3 SNP data set (Bukowski *et al.* 2018).  
555 Although 343 inbred maize lines were crossed to *Oy1-N1989/oy1:B73*, only 305 inbred  
556 lines were genotyped as part of HapMap3 and were subsequently used for GWAS. The  
557 variation in mutant plant's CCMI, CCMII, and their ratios identified a single locus that  
558 passed a multiple test correction (see Methods) on chromosome 10 at the site of the *oy1*  
559 gene. Just like the detection of the *vey1* QTL in the B73 x Mo17 RIL, no other loci  
560 modifying these traits were identified in the GWA analysis. No statistically significant peak  
561 was detected for the wild-type CCM traits. The Manhattan plot showing the negative log<sub>10</sub>  
562 of the p-values from GWA tests for all the SNPs for MT\_CCMII trait is graphed in **Figure**  
563 **4a**. A closer view of the SNPs within the region encoding the *vey1* locus on chromosome  
564 10 are plotted in **Figure 4c**. A summary of the GWAS results for mutant CCM and ratio  
565 traits is presented in **Table S15**. The top association for the mutant CCM traits was a SNP  
566 at position 9161643 on chromosome 10 located just 3' of the *oy1* locus (a gene on the  
567 reverse strand). This SNP displays high allelic frequency in our population ( $f=0.49$ ). Thus,  
568 it appears that the *oy1* locus can be responsible for the suppression of the *Oy1-N1989*  
569 mutant allele in the diverse panel of maize inbred lines analyzed in this experiment.  
570 Analysis of the LD between S10\_9161643 and the other variants in this region identified  
571 no other variants with  $r^2$  greater than 0.5 despite the relatively strong associations between  
572 many SNPs and the CCM traits (**Figure 4e**). LD was substantially higher for SNPs encoded  
573 towards the telomere from *oy1* than towards the centromere, with a strong discontinuity of  
574 LD at the 3'-end of *oy1*. Given the relatively low p-values calculated for multiple SNPs in  
575 the area, this raises the possibility that multiple alleles could contribute to the suppression  
576 of the *Oy1-N1989* phenotype. To test for multiple genetic effects at this locus, the  
577 genotypes at SNP S10\_9161643 were used as a covariate, and the genetic associations were  
578 recalculated. If SNPs segregate independently of S10\_9161643 and contribute to *Oy1-*  
579 *N1989* suppression, the p-values of association test statistics for such variants should  
580 decrease in this analysis (become more significant). On the contrary, those SNPs that have  
581 relatively low p-values due to linkage with S10\_9161643 should become less significant  
582 in the covariate model. When these analyses were done, low-frequency variants at the 5'  
583 end of the *oy1* locus were identified as the most significant SNPs and passed a  
584 chromosome-wide multiple test correction (**Figure 4b and 4d**). This result suggests that

585 there are multiple alleles capable of modifying the *OyI-NI989* mutant phenotype in the  
586 MDL panel. The top SNP on chromosome 10 in the covariate model of MLM was detected  
587 at position 9179932 and the allele associated with *OyI-NI989* suppression is a relatively  
588 rare variant ( $f=0.08$ ). It remains formally possible that the SNP S10\_9179932 is not  
589 causative and merely in LD with a causative polymorphism, and the second locus is  
590 fortuitously present in recombinant haplotypes. Analysis of LD of S10\_9179932 with other  
591 SNPs in ~500 kb window detected multiple SNPs of low allelic frequency that were in high  
592 LD ( $r^2 \sim 0.85$ ) towards the 5' end of *oyI* (**Figure 4f**). Consistent with the strong  
593 discontinuity of LD at 3' end of *oyI* with S10\_9161643, we observed discontinuity of LD  
594 with S10\_9179932 at 5' end of the *oyI* locus. The LD analyses suggest that S10\_9161643  
595 and S10\_9179932 are not in LD with each other and can act independently. These two  
596 SNPs account for ~27 percent of the mutant CCMII variation in the MDL x *OyI-*  
597 *NI989/oyI:B73* F<sub>1</sub> population (**Table S15**).

598         Given that the MLM model using S10\_9161643 as a covariate detected  
599 S10\_9179932 as the most significant association, we tested the phenotypic outcome of the  
600 four possible haplotypes at these two SNPs in the MDL F<sub>1</sub> population. We observed that  
601 the four haplotypes at these two SNPs varied only for mutant CCM traits, with haplotypes  
602 AG and CA being the most favorable (highest CCM mean) and least favorable (lowest  
603 CCM mean), respectively (**Table S16**). Alleles at these two SNPs affected CCMI and  
604 CCMII in the mutant plants, consistent with additive inheritance for two polymorphisms.  
605 The additive impacts of the SNPs make mechanistic predictions about the suppression of  
606 *OyI-NI989*. This additivity is consistent with independent alleles acting in cis at *oyI* to  
607 modify the *OyI-NI989* mutant phenotype. Consistent with the strong enhancement caused  
608 by crossing Mo17 to *OyI-NI989/oyI:B73*, the Mo17 *oyI* locus encodes the most severe,  
609 and relatively rare, CA allele combination, and B73 encodes the most suppressing AG  
610 allele combination (**Table S16**). Thus, the line-cross mapping was performed with inbred  
611 lines that carry the most phenotypically extreme allele combinations of these two SNPs in  
612 the vicinity of the *oyI* locus.

613

614 ***Oy1-N1989* is a semi-dominant chlorophyll mutant and enhanced by reduced**  
615 **function at *oy1***

616 If alleles of *oy1* encode the suppression of *Oy1-N1989*, then the phenotype of  
617 heterozygous *Oy1-N1989* should be strongly responsive to other mutant alleles at *oy1*.  
618 Maize seedlings that are heterozygotes between *Oy1-N1989* and hypomorphic *oy1* alleles  
619 are more severe than isogenic *Oy1-N1989/oy1* siblings (Sawers *et al.* 2006). To confirm  
620 that the reduced *oy1* function could determine the differential sensitivity to *Oy1-N1989*,  
621 we crossed dominant and recessive mutant alleles of *oy1* to each other. The recessive weak  
622 hypomorphic allele *oy1-yg* was obtained from the Maize COOP in the unknown genetic  
623 background. The homozygous *oy1-yg* plants were crossed as a pollen-parent with both B73  
624 and Mo17 to develop F<sub>1</sub> material that would segregate the mutation. The F<sub>1</sub> plants were  
625 then crossed to *Oy1-N1989/oy1*:B73 as well as backcrossed to the *oy1-yg* homozygotes in  
626 the original mixed background. These crosses allowed us to recover plants that had *Oy1*-  
627 *N1989* in combination with the wild-type *oy1*<sup>B73</sup>, wild-type *oy1*<sup>Mo17</sup>, and mutant *oy1-yg*  
628 alleles. Chlorophyll contents were determined using CCM at 21 and 40 days after sowing  
629 in the field. The *Oy1-N1989* allele was substantially enhanced when combined with the  
630 *oy1-yg* allele, demonstrating that reduced function of the *oy1* allele in Mo17 could be the  
631 genetic basis of *vey1* QTL (**Figures 5a and 5b**). A summary of these data is presented in  
632 **Table S17**. This result is similar to the one described by Sawers *et al.* 2006, where a  
633 reduction in chlorophyll content was observed when *Oy1-N1989* mutant allele was  
634 combined with a recessive allele of *oy1* (*chl1-MTMI*). We also noticed a similar drop in  
635 chlorophyll accumulation in the *oy1-yg* homozygotes as oppose to *oy1-yg* heterozygotes  
636 with wild-type *oy1* allele from both B73 and Mo17 in the BC<sub>1</sub>F<sub>1</sub> progenies (**Figure 5c and**  
637 **Table S17**). However, we did not observe any significant difference in the *oy1-yg*  
638 heterozygotes with B73 and Mo17 wild-type *oy1* allele. Selfed progeny from *Oy1-N1989*  
639 heterozygotes segregated for yellow-seedling lethal *Oy1-N1989* homozygotes with no  
640 detectable chlorophyll by either CCM or spectrophotometer quantification (**Table S6**).  
641 Therefore, consistent with previous work (Hansson *et al.* 2002; Sawers *et al.* 2006), the  
642 *Oy1-N1989* is a dominant-negative neomorphic mutant allele with no evident MgChl  
643 activity under the tested conditions. Based on these genetic data, any QTL resulting in

644 decreased expression of *oyl* or an increased proportion of mutant to wild-type gene product  
645 in the *Oy1-N1989/oyl* heterozygotes can increase the severity of the mutant phenotype.

646

#### 647 **No coding sequence difference in OY1 accounts for *vey1* inheritance**

648 Our reliance on SNP variation leaves us open to the problem that linked, but the  
649 unknown non-SNP variation can be responsible for *vey1*. Given that reduced *oyl* activity  
650 enhanced the phenotype of *Oy1-N1989*, we sequenced the *oyl* locus from Mo17 and B73  
651 to determine if coding sequence differences could encode the *vey1* modifier. The only non-  
652 synonymous changes that distinguish these two alleles is at the site of the previously  
653 reported in-frame 6 bp insertion (Sawers *et al.* 2006), which adds alanine (A) and threonine  
654 (T) amino acid residues to the OY1 protein. PCR amplification of *oyl* locus in 18 maize  
655 inbred lines, as well as the *Oy1-N1989* allele, was performed. Sequencing of the  
656 amplification products confirmed the absence of the 6 bp insertion in *Oy1-N1989* allele  
657 reported by Sawers *et al.* 2006. In addition, multiple inbred lines including B73, CML103,  
658 and CML322 also carried this 6 bp in-frame deletion. A polymorphism within the 6 bp  
659 insertion was also found that resulted in an alternative in-frame insertion encoding an  
660 alanine and serine (S) codon in Mo17 and five other inbred lines. Thus, three alleles at this  
661 site were found to be a common variant in OY1 gene product. These allelic states of *oyl*  
662 did not explain the phenotypic severity of CCM trait value in the F<sub>1</sub> mutant siblings (**Figure**  
663 **6**). The allelic state of *oyl* at this polymorphic site in 18 maize inbred lines and the average  
664 CCM trait values in the wild-type and mutant siblings of their respective F<sub>1</sub> progenies with  
665 *Oy1-N1989/oyl*:B73 are summarized in **Table S18**. Five inbred lines, including Mo17,  
666 resulted in dramatic enhancement of the CCMI and ratio of CCMI phenotypes of F<sub>1</sub> plants  
667 crossed to *Oy1-N1989/oyl*:B73. These enhanced genotypes encoded all three possible  
668 alleles at *oyl*. In addition, the suppressing inbred lines also encoded all three possible  
669 alleles. Besides this 6 bp indel, three inbred lines had few more variants in OY1 protein.  
670 An enhancing inbred line CML322 had two missense mutations that lead to amino acid  
671 change at position 321 (D->E), and 374 (S->I). A suppressing inbred line NC358 had one  
672 amino acid change at position 336 (D->G) and the enhancing inbred Tzi8 had a 15 bp in-  
673 frame deletion leading to the removal of five amino acids (VMGPE) in the third exon of  
674 the coding sequence. Even considering the additional alleles at *oyl* found in few maize

675 inbred lines, these results suggest that the only coding sequence polymorphism at *oyl*  
676 between B73 and Mo17 could not be genetic basis of *vey1*. This result leaves the two  
677 additive top SNPs in cis with *oyl* as the most likely cause of cis-acting regulatory variation.  
678

#### 679 **Expression level polymorphism at *oyl* co-segregates with suppression of *Oy1-N1989***

680 Measurements of mRNA accumulation from *oyl* in the IBM was available in a  
681 previously published study (Li *et al.* 2013, 2018). The normalized transcript abundance  
682 (expressed as RPKM) of OY1 from the shoot apex of 14 days old maize seedlings from  
683 IBM were obtained from MaizeGDB (Sen *et al.* 2010). Out of 105 IBM lines that were  
684 assessed for expression level, 74 were among those tested for chlorophyll accumulation in  
685 *Oy1-N1989* F<sub>1</sub> hybrid populations. Using the genetic marker *isu085b* that is linked to *oyl*  
686 locus, we determined that a cis-acting eQTL controlled the accumulation of OY1  
687 transcripts in IBM shoot apex (**Figure 7**). A summary of these data is presented in **Table**  
688 **S19**. This cis-acting eQTL conditioned greater expression of the B73 allele and explained  
689 19 percent of the variation ( $p < 0.0001$ ) in OY1 transcript abundance in the IBM. Given  
690 the enhancement of *Oy1-N1989* by the *oyl-yg* allele, a lower expression of the wild-type  
691 *oyl* allele from Mo17 is expected to enhance the phenotype of *Oy1-N1989* (**Figure 5**). In  
692 addition, OY1 RPKM values obtained from the shoot apex of IBM were able to predict the  
693 CCM trait values in the mutant but not the wild-type siblings in IBM F<sub>1</sub> population with  
694 *Oy1-N1989/oyl:B73* (**Figure 7**). This result suggests that inbred lines with increased  
695 MgChl subunit I transcripts available for protein production and MgChl complex assembly  
696 could overcome chlorophyll accumulation defects caused by the *Oy1-N1989/oyl* genotype  
697 in IBM F<sub>1</sub> hybrids. Consistent with this, full linear regression model that included both the  
698 *isu085b* marker (cis-eQTL) genotypes and the residual variation in RPKM at OY1 did a  
699 better job in predicting CCMI and CCMII in the IBM mutant F<sub>1</sub> hybrids than the *isu085b*  
700 marker by itself. If the cis-eQTL at *oyl*, which results in differential accumulation of OY1  
701 transcripts in the IBM inbred lines can affect allele-specific expression in the F<sub>1</sub> hybrids, it  
702 could explain the better performance of the IBM mutant F<sub>1</sub> hybrids with the B73 allele at  
703 *vey1*.

704 A previous study of allele-specific expression in the F<sub>1</sub> hybrid maize seedlings  
705 identified expression bias at *oyl* towards B73 in the hybrid combinations of B73 inbred

706 line with PH207 and Mo17 but not Oh43 (Waters *et al.* 2017). We used two SNP positions,  
707 SNP\_252 and SNP\_317, to explore the allele-specific expression of OY1 in our materials.  
708 SNP\_252 is the causative polymorphism for the *Oy1-NI989* missense allele while  
709 SNP\_317 is polymorphic between B73 and Mo17, but monomorphic between *Oy1-NI989*  
710 and B73. As the original allele of the *Oy1-NI989* mutation was isolated from a *rl cl*  
711 colorless synthetic stock of mixed parentage (G. Neuffer, personal communication), this  
712 raises the possibility that the same cis-acting regulatory variation that lowered expression  
713 of OY1 from PH207 and Mo17 when combined with the B73 allele might also be present  
714 in the *oy1* allele that was the progenitor of *Oy1-NI989*. We tested this possibility by using  
715 the SNPs that distinguish B73, Mo17, and the *Oy1-NI989* alleles to measure allele-specific  
716 expression in each of the hybrids. Consistent with the previous data (Waters *et al.* 2017),  
717 we observed biased expression at *oy1* towards the B73 allele in the B73 x Mo17 F<sub>1</sub> wild-  
718 type hybrids (**Table 1**). Extended data from this experiment is provided in **Table S20**. In  
719 the B73 isogenic crosses, transcripts from the *Oy1-NI989* and B73 wild-type alleles  
720 accumulated to equal levels in the heterozygotes, indicating that the suppressed phenotype  
721 of the mutants in B73 background was not due to a lowered expression of *Oy1-NI989*  
722 relative to the wild-type allele. Remarkably, mutant siblings from the reciprocal crosses  
723 between *Oy1-NI989/oy1*:B73 and Mo17 resulted in greater expression from the *Oy1-*  
724 *NI989* allele than the wild-type *oy1* allele of Mo17. Allele-specific bias at *oy1* was  
725 significantly higher towards the *Oy1-NI989* allele in the *Oy1-NI989* mutant heterozygotes  
726 in the B73 x Mo17 hybrid background compared to B73 isogenic material. Thus, in mutant  
727 hybrids, overexpression of *Oy1-NI989* relative to the wild-type *oy1* allele in Mo17 could  
728 account for increased phenotypic severity.

729 If *vey1* is encoded by an eQTL, then PH207 should encode an enhancing allele and  
730 Oh43 should encode a suppressing allele of *vey1*. We tested this genetically by producing  
731 F<sub>1</sub> progenies in crosses of PH207 and Oh43 by *Oy1-NI989/oy1*:B73 pollen. Oh43 was  
732 evaluated in our initial screening and also as part of the MDL panel used for GWAS. In  
733 both experiments, the F<sub>1</sub> hybrids between Oh43 and *Oy1-NI989/oy1*:B73 suppressed the  
734 mutant phenotype, suggesting that Oh43 is a suppressing inbred line (CCM values in  
735 **Tables S4 and S18**). B73 x PH207 F<sub>1</sub> hybrids were missing from our previous datasets.  
736 We crossed PH207 ears with pollen from *Oy1-NI989/oy1*:B73 plants. The F<sub>1</sub> hybrids from



737 this cross were analyzed in the greenhouse at seedlings stage along with F<sub>1</sub> hybrids of B73  
738 x *Oy1-NI989/oy1*:B73 and Mo17 x *Oy1-NI989/oy1*:B73 F<sub>1</sub> progenies as controls. PH207  
739 was an enhancing inbred genotype as mutant heterozygotes in a PH207 x B73 F<sub>1</sub> genetic  
740 background accumulated less chlorophyll than mutants in the B73 isogenic background  
741 (**Figure S8 and Table S21**).

742 We further leveraged the normalized expression data of OY1 in the emerging shoot  
743 tissue of the maize diversity lines (Kremling *et al.* 2018) and used the top two additive  
744 SNPs (S10\_9161643 and S10\_9179932) at *vey1* from GWAS to test if these cis-variants  
745 of *oy1* affect its expression. When tested, plants carrying alleles A and G at marker  
746 S10\_9161643 and S10\_9179932, respectively, showed highest OY1 abundance in the  
747 emerging shoots of diverse maize inbred lines, whereas, plants with alleles C and A at  
748 S10\_9161643 and S10\_9179932, respectively, showed lowest OY1 count (**Table S22**).  
749 Alleles that suppress *Oy1-NI989* linked to either SNP were associated with the greater  
750 abundance of OY1 transcripts. This observation is consistent with the hypothesis that  
751 increased OY1 abundance can overcome the negative effect of the *Oy1-NI989* allele.  
752 Consistent with the additive suppression of leaf greenness in *Oy1-NI989* mutants by the  
753 alleles at S10\_9161643 and S10\_9179932 discussed previously (**Table S16**), these alleles  
754 were also additive for their impacts on OY1 transcript abundance (**Table S22**). Thus, it is  
755 likely that multiple phenotypically affective polymorphisms linked to these top unlinked  
756 SNPs underlie cis-acting regulatory variation at *oy1*.

757 The effect sizes of the gene expression changes observed in the IBM, diverse maize  
758 inbred lines, and allele-specific expression in hybrids are quite modest, resulting in ~10%  
759 of differences in *oy1* accumulation. If these changes in wild-type OY1 transcript  
760 accumulation are responsible for suppression of *Oy1-NI989*, then the severity of the mutant  
761 phenotype (as indicated by CCM) in the MDL F<sub>1</sub> population should correlate with OY1  
762 expression level. As expected, we observed a statistically significant positive correlation  
763 between the mutant derived CCM traits and OY1 counts (**Table S23**). Wild-type CCM in  
764 the MDL F<sub>1</sub> population did not show any significant correlation with OY1 abundance in  
765 the emerging shoot tissue of maize inbred lines. These correlations are in agreement with  
766 the lack of any QTL at this locus controlling wild-type chlorophyll levels, and the epistatic  
767 relationship between *vey1* and *Oy1-NI989*.

768

769 **Discussion**

770 The semi-dominant mutant allele *OyI-N1989* encodes a dominant-negative allele  
771 at the *oyI* locus, which compromises MgChl enzyme activity (Sawers *et al.* 2006). In a  
772 heterozygous condition, the strength of the negative effect of this allele on the MgChl  
773 enzyme complex depends on the wild-type *oyI* allele. B73 and Mo17 show differential  
774 suppression response in mutant heterozygotes resulting in suppressed and severe mutant  
775 phenotype, respectively. Thus, the *OyI-N1989* mutant allele can sensitize maize plants to  
776 variation in MgChl and expose a phenotypic consequence for genetic variants that are  
777 otherwise invisible. Similar methodology has been adopted previously in maize to gain the  
778 genetic understanding of various traits (Chintamanani *et al.* 2010; Olukolu *et al.* 2013,  
779 2014; Buescher *et al.* 2014). Employing a mutant allele as a reporter to screen for effects  
780 of natural variants is a simple and efficient technique to detect standing variation in a  
781 specific biological process. Although *veyI* polymorphisms are phenotypically  
782 consequential in the presence of *OyI-N1989* allele, no QTL was detected in the absence of  
783 *OyI-N1989* allele. These cryptic genetic variants, or contingent QTL, result from epistasis  
784 of *OyI-N1989* and permits the discovery and re-classification of DNA sequence variants  
785 that might otherwise be hypothesized to be neutral or non-functional in plant adaptation.  
786 Thus, genetic screens based upon semi-dominant mutant alleles as reporters offer a cost-  
787 effective and robust approach to map QTL(s) for metabolic pathways of interest by  
788 leveraging the publicly available genetic resources such as bi-parental mapping  
789 populations and maize diversity lines.

790 Alleles with modest fitness consequences may not be visible to researchers working  
791 with population sizes even in the thousands, such as in GWAS. By contrast, evolutionarily-  
792 relevant segregating variation may have minimal phenotypic effects. One of the possible  
793 uses of MAGIC is in boosting the relative contribution of natural variants to phenotypic  
794 variance in the trait of interest. This can both uncover cryptic variation affecting a  
795 biochemical pathway of interest and assist in improving the mapping resolution of a  
796 detected QTL. Not all of the cryptic variation observed by these mutant-contingent QTL  
797 approaches need be fitness-affecting, and interpreting mutant-conditioned phenotypes as  
798 non-neutral variation would be a mistake. It is, of course, possible that neutral variants may



799 result in increased severity of a mutant phenotype due to changes not physiologically  
800 relevant for all alleles of that reporter gene present in a species. Nevertheless, it can identify  
801 new pathway member and inform us about the allelic variation in the species and pathway  
802 topology via gene discovery.

803 In the current study, use of bi-parental mapping populations derived from the same  
804 inbred lines but developed using different intercross and inbreeding schemes provided the  
805 opportunity to compare the effect of additional rounds of random interbreeding in the  
806 development of mapping population on the genetic resolution. The comparative fine  
807 mapping of *vey1* in the Syn10 population, that employed ten rounds of random mating,  
808 provided far better localization of the *vey1* QTL than the IBM populations that was derived  
809 from four rounds of random mating. This observation demonstrates the benefits of  
810 increased recombination during random intermating of early generations in QTL  
811 localization. Based on these results, as future RILs are generated, we recommend increased  
812 intermating in the early generations followed by DH induction rather than relying on  
813 further recombination during the self-pollination cycles of RIL development.

814 As expected, GWAS provided a fine-scale genetic resolution and corroborated the  
815 mapping of *vey1*. The distance between the best marker and the *oy1* gene was substantially  
816 less in the GWA experiments. GWAS identified two SNPs, one in the 5' and another in the  
817 3' intergenic DNA, proximate to *oy1* that represent candidate quantitative trait nucleotides  
818 (QTN). The architecture of this region included four haplotypes with every combination of  
819 alleles at these two SNPs. The signal detection by multiple unlinked SNPs in GWAS may  
820 indicate a complex set of phenotypically affective alleles at the *oy1* locus. Alternatively, it  
821 could very well be an artifact of missing the causative polymorphism within our genetic  
822 data resulting in strong associations with markers that are tightly linked to the causative  
823 variation but unlinked or in repulsion to each other. For example, indel variation is not  
824 captured by the approaches used in the GWA analysis. Consistent with two QTN, rather  
825 than fortuitous linkage of tag SNPs with a single causative polymorphism, alleles at the  
826 two SNPs additively influenced chlorophyll contents in the mutant siblings. Future work  
827 to identify the nucleotide changes responsible for the differences between B73, Mo17, and  
828 other inbred lines that encode *vey1* will be required to test these possibilities definitively.

829 Together, this study illustrates the complementary nature of line-cross QTL mapping and  
830 GWAS to explore the genetics of the trait under investigation.

831 We used *Oy1-NI989* together with a non-destructive, inexpensive, and rapid  
832 phenotyping method to measure leaf chlorophyll. Rapid and robust phenotyping is critical  
833 and contributed to the strong correlation between the absolute trait measurement and the  
834 estimated phenotypes like CCM. Previous studies have highlighted the importance of  
835 benchmarking indirect measurements or proxies for traits of interest. For instance, near  
836 infrared reflectance spectroscopy (NIRS) that estimates major and total carotenoids in  
837 maize kernels could replace sensitive, accurate, cumbersome, expensive, slow, and  
838 destructive measurements by HPLC (Berardo *et al.* 2004). Comparisons of HPLC and  
839 NIRS measurements resulted in a correlation of 0.85 for total carotenoids (Berardo *et al.*  
840 2004). A subjective visual score for yellow color in maize kernels was not adequate,  
841 yielding a correlation of 0.12 with HPLC measurements of total carotenoids (Harjes *et al.*  
842 2008). Thus, using mutant alleles as reporters to develop methodologies that rely on non-  
843 invasive multispectral or hyperspectral data as proxies for specific biochemical compounds  
844 will accelerate studies on gene function and allele discovery. This approach can enable  
845 genetic studies that are currently deemed unfeasible due to the arduous task of phenotyping  
846 large populations for traits only visible in the laboratory.

847

848 **How could a 10% change in wild-type OY1 expression affect chlorophyll**  
849 **biosynthesis in the *Oy1-NI989/oy1* mutant heterozygotes?**

850 Magnesium chelatase (MgChl) is formed by a trimer of dimers of MgChl subunit I  
851 interacting with the other subunits of MgChl complex. A previous study found that addition  
852 of mutant or wild-type BCHI protein to pre-assembled MgChl complexes resulted in  
853 altered reaction rates due to differences in subunit turnover, which occurred on a minutes  
854 time-scale (Lundqvist *et al.* 2013). This subunit turnover and reformation of the complex  
855 dynamically exchange mutant and wild-type BCHI subunits over time. Therefore, any net  
856 increase in the amount of wild-type OY1 in the reaction pool, for instance, due to higher  
857 transcription of wild-type *oy1* allele will allow a higher rate of magnesium chelatase  
858 activity and result in more chlorophyll biosynthesis. The observation of stronger affinity  
859 and greater dissociation rate of BCHI<sup>L111F</sup> subunits (orthologous to the L176F change

860 encoded by *Oy1-N1989*) for the wild-type subunits (Hansson *et al.* 2002) suggests that  
861 exchange of BCHI monomeric units in the magnesium chelatase complex might also differ  
862 based on the structure of BCHI protein (Lundqvist *et al.* 2013). In the AAA<sup>+</sup> protein family,  
863 the ATP-binding site is located at the interface of two neighboring subunits in the  
864 oligomeric complex (Vale 2000). Since a dimer of functional MgChl subunit I proteins are  
865 required for the complex to carry out MgChl activity (Lundqvist *et al.* 2013),  
866 approximately 1 in 3 dimers of assembled MgChl subunit I will be active in a 1:1 mixture  
867 of wild-type and BCHI<sup>L111F</sup>. Indeed, complexes made from reaction mixtures with equal  
868 proportions of wild-type and BCHI<sup>L111F</sup> subunits resulted in ~26% of the enzyme activity  
869 of an equivalent all-wildtype mix (Lundqvist *et al.* 2013). Therefore, we expect that  
870 decreasing expression of the wild-type *oy1* subunit by 10% and creating a 0.9:1.1 mixture  
871 of wild-type OY1 and mutant OY1-N1989 protein, respectively, would result in ~21%  
872 activity compared to the activity of all-wildtype mixture. Likewise, increasing the wild-  
873 type *oy1* expression by 10% would result in ~30% activity of MgChl compared to the all-  
874 wildtype mixture. This dosage-sensitivity is a general feature of protein complexes  
875 (Birchler and Veitia 2012; Veitia 2003; Grossniklaus, Madhusudhan, and Nanjundiah  
876 1996; Birchler and Newton 1981), and the semi-dominant nature of *Oy1-N1989* is dosage  
877 sensitive. Taking these observations and proposed models on the dynamics of molecular  
878 interaction between the wild-type and mutant BCHI protein subunits (especially  
879 BCHI<sup>L111F</sup>) into account, it is formally possible that a small change in the expression of  
880 wild-type OY1 can have a significant impact on the magnesium chelatase activity of  
881 heterozygous *Oy1-N1989/oy1* plants. The increase in magnesium chelatase activity due to  
882 the even small relative increase in the proportion of wild-type OY1 transcripts over the  
883 mutant OY1-N1989 transcripts will read out as a proportional, presumably non-linear,  
884 increase in chlorophyll accumulation.

885

### 886 **What is *vey1*?**

887 Variation at the *vey1* locus appears to be the result of allelic diversity linked to the  
888 *oy1* locus. The only remaining possibilities are regulatory polymorphisms within the cis-  
889 acting control regions of *oy1*. Previous studies have utilized reciprocal test-crosses to loss-  
890 of-function alleles in multiple genetic backgrounds to provide single-locus tests of additive

891 QTL alleles in an otherwise identical hybrid background (Dilkes *et al.* 2008). Protein-null  
892 alleles of *oyl* isolated directly from the B73 and Mo17 backgrounds could be used to carry  
893 out a similar test. The intergenic genomic region in maize is spanned by transposable  
894 elements and can be highly divergent between different inbred lines due to large  
895 insertions/deletions polymorphisms (SanMiguel and Bennetzen 1998). Consistent with  
896 this, inbreds B73 and Mo17 are polymorphic at the region between *oyl* and *gfa2*. These  
897 two maize inbred lines share ~12 kb of sequence interspersed with numerous large  
898 insertions and deletions that add ~139 kb of DNA sequence to Mo17 as compared to B73  
899 (data not shown). However, we did not find any conserved non-coding sequence (CNS) in  
900 this region (data not shown). It is conceivable that recombinants at *oyl* between B73 and  
901 Mo17 themselves could be identified and used to test the effects of upstream or  
902 downstream regulatory sequences. The recombinant haplotypes encoding all four possible  
903 alleles at the top two SNPs identified in the GWAS indicate that Mo17 may be a strong  
904 enhancer due to more than one causative polymorphism.

905 In the absence of such recombinants, we can only consider what mechanisms might  
906 be consistent with the observed suppression of the chlorophyll biosynthesis defects such as  
907 cis-acting effects on OY1 transcript abundance, and allele-specific gene expression.  
908 Genotype at *vey1* in wild-type plants accounted for only 19 percent of the variation in OY1  
909 abundance in the shoot apices of the IBM. This QTL accounted for more than 80 percent  
910 of the variation in chlorophyll content in mutants. If transcript accumulation is insensitive  
911 to the presence of *Oyl-NI989* allele, then the remaining ~80 percent of the variation in  
912 OY1 abundance observed as not *vey1*-dependent in the wild-type IBM might be expected  
913 to account for a greater change in phenotype. However, trans-acting effects or  
914 environmental effects that would equally affect both alleles at the *oyl* locus would be  
915 expected to have a lesser impact on suppression of the deleterious *Oyl-NI989* allele. The  
916 effect of cis-acting eQTL on *oyl* expression would eventually result in a greater or lesser  
917 proportion of wild-type OY1 protein accumulation. These allele-specific differences will  
918 alter the mutant to wild-type subunit stoichiometry which should have a greater impact on  
919 chlorophyll content than changes in absolute RPKM, due to the competitive inhibition of  
920 MgChl complex activity by *Oyl-NI989* (Sawers *et al.* 2006; Lundqvist *et al.* 2013), as  
921 detailed above.

922           The reciprocal crosses between *Oy1-NI989/oy1*:B73 and Mo17 did not result in  
923 different phenotypes. Thus, *vey1* does not exhibit imprinting. Allele-specific expression at  
924 *oy1* locus in the *Oy1-NI989* heterozygous mutants demonstrated the existence of functional  
925 cis-acting regulatory polymorphism between *Oy1-NI989* and both wild-type *oy1* alleles in  
926 B73 and Mo17. In addition, *oy1* is affected by a cis-eQTL in the IBM and MDL. Together  
927 with our other data, the allele-specific expression at OY1 that was visible when we re-  
928 analyzed the data from Waters *et al.* 2017, we propose that *vey1* is encoded by cis-acting  
929 regulatory DNA sequence variation (**Figure S9**). Ultimately, transgenic testing of *oy1* cis-  
930 acting regulatory polymorphisms identified from assembled maize genomes is required to  
931 determine the causative variant(s) encoding *vey1*. Sequence comparisons outside the  
932 protein coding sequence of the gene can be quite challenging, especially in maize, as it  
933 exhibits limited to poor sequence conservation between different inbred lines (SanMiguel  
934 *et al.* 1996). Thus, distinguishing phenotypically affective polymorphisms from the neutral  
935 variants is not trivial. As a result, biochemical and *in vitro* studies are the best tool for  
936 functional validation of these polymorphisms (Wray *et al.* 2003). Similar experiments have  
937 been done to characterize the role of DNA sequence polymorphisms in cis on the  
938 expression of downstream genes in case of *flowering locus T* in *Arabidopsis* and *teosinte*  
939 *branched1* in maize (Adrian *et al.* 2010; Studer *et al.* 2011).

940

#### 941 **Relevance to research on transcriptional regulation**

942           Since their discovery, the role of regulatory elements in gene function has been  
943 recognized as vital to our understanding of biological systems (McClintock 1950, 1956a,  
944 1956b, 1961; Peterson 1953; Jacob and Monod 1961). Gene regulation and gene product  
945 dosage are at the forefront of evolutionary theories about sources of novelty and  
946 diversification (Ohno 1972; King and Wilson 1975). Transcriptional regulation of a gene  
947 can be as important as the protein coding sequence (Wray *et al.* 2003). For instance,  
948 complete knock-down of expression of a gene by a regulatory polymorphism will have the  
949 same phenotypic consequence as the non-sense mediated decay of a transcript harboring  
950 an early stop codon (Willing *et al.* 1996). But we do not have a set of rules, analogous to  
951 codon tables, for functional polymorphisms outside the coding sequence of a gene.

952 Detecting expression variation and tying it to phenotypic consequence, especially in the  
953 absence of CNS, remains a challenge to this day.

954 Several eQTL studies ranging from unicellular to multicellular eukaryotic  
955 organisms have found abundant cis and trans-acting genomic regions that affect gene  
956 expression (Brem *et al.* 2002; West *et al.* 2007; Li *et al.* 2013, 2018). The proportion of  
957 cis-acting eQTLs from the total eQTLs detected in various studies including yeast, mouse,  
958 rat, humans, eucalyptus, and maize range from 19-92% (Gibson and Weir 2005; Li *et al.*  
959 2013, 2018). Expression polymorphisms are a potential source of variation in some  
960 phenotypic traits (Gibson and Weir 2005), and multiple studies detected expression  
961 polymorphisms co-segregating with phenotypic variation, including contributions to  
962 species domestication (Clark *et al.* 2006; Salvi *et al.* 2007; Schwartz *et al.* 2009; Lemmon  
963 *et al.* 2014). But a majority of the cis-eQTLs only exhibit a moderate difference in the gene  
964 expression. Detecting such variants and linking them to visible phenotypes may require  
965 detailed study using approaches focused on the specific biological process affected by the  
966 gene product. We do not yet have a standardized experimental tool for these purposes. As  
967 such, we cannot simultaneously identify and characterize the phenotypic impact of most  
968 cis-acting eQTLs.

969 The *veyl* polymorphism detected in the current study co-segregates with a cis-  
970 eQTL at *oyl* in IBM (Li *et al.* 2013, 2018) and diverse maize inbred lines (Kremling *et al.*  
971 2018). Using *Oyl-NI989* allele to expose the consequences of these cis-eQTLs allowed  
972 chlorophyll approximation using CCM to substitute for expensive, cumbersome, highly  
973 sensitive gene expression assays or metabolite measurements. The high heritability of this  
974 alternative and direct phenotype, allowed us to scan large populations at a rapid rate to  
975 identify the genomic regions underlying the cis-acting regulatory elements and study allelic  
976 diversity in the natural population of maize. We propose that the approach we have taken  
977 is not likely to be unique to *oyl*. Therefore, we propose that all semi-dominant mutant  
978 alleles can be used as reporters to not only detect novel cis-acting gene regulatory elements  
979 but also functionally validate previously-detected cis-eQTL(s) from genome-wide eQTL  
980 studies.

## **Acknowledgements**

Authors acknowledge the help of the staff at Purdue ACRE farm for assistance with planting and crop management of all the field experiments described in this study. R.S.K was supported by USAID Feed the Future CGIAR-US Initiative grant “Heat stress resilient maize for South Asia through a public-private partnership” to G.S.J.. This work was supported by NSF grant 1444503 awarded to G.S.J. and B.P.D. We especially thank the Muehlbauer lab for making their data open to the public, and the USDA for the MaizeGDB website, which allowed us to reanalyze the eQTL data.



## Tables

**Table 1.** The allele-specific expression at *oy1* in the top fully-expanded leaf at the V3 developmental stage of B73 x Mo17 F<sub>1</sub> wild-type and *Oy1-N1989/oy1* mutant siblings, and inbred *Oy1-N1989/oy1:B73* mutants.

## Figures

**Figure 1.** The chlorophyll pigment accumulation differs in severity for *Oy1-N1989/oy1* heterozygotes in the B73 and B73 x Mo17 hybrid backgrounds.

**Figure 2.** The crossing scheme used to map *Oy1-N1989* enhancer/suppressor loci in IBM and Syn10 populations.

**Figure 3.** The phenotypic distribution, QTL analysis, and fine mapping results of MT\_CCMII trait.

**Figure 4.** The Manhattan plots of SNPs associations with MT\_CCMII trait in MDL x *Oy1-N1989/oy1:B73* F<sub>1</sub> populations.

**Figure 5.** The single locus test of *oy1* showing the interaction between wild-type alleles of *oy1* from B73 and Mo17 with semi-dominant and recessive mutant alleles *Oy1-N1989* and *oy1-yg*, respectively.

**Figure 6.** The distributions of CCM trait measurements in the F<sub>1</sub> progenies of a sub-set of maize inbred lines crossed with *Oy1-N1989/oy1:B73* at three allelic variants in the *oy1* coding sequence identified in respective inbred lines.

**Figure 7.** Expression of OY1 in the shoot apices of 14 days old IBM seedlings co-segregates with *vey1*.

## Supplemental tables

**Table S1.** The trait mean values of the CCM traits for the wild-type (WT) and mutant (MT) siblings of the F<sub>1</sub> hybrids of *Oy1-N1989/oy1:B73* (pollen-parent) with respective IBM lines.

**Table S2.** The trait mean values of the CCM traits for the wild-type (WT) and mutant (MT) siblings of F<sub>1</sub> hybrids of *Oy1-N1989/oy1:B73* (pollen-parent) with respective Syn10 line.

**Table S3.** The average values of the CCM traits in wild-type (WT) and mutant (MT) siblings of the F<sub>1</sub> hybrids between *Oy1-N1989/oy1:B73* (as a pollen-parent) with respective BM-NILs. Data is derived from the field-grown plants with five replications planted in a RCBD. Parental (B73 and Mo17) F<sub>1</sub> crosses were planted as checks in each replication. Multiple plants (2-3) were measured for each genotype (wild-type or mutant) in each replication.

**Table S4.** The BLUP values of the wild-type (WT) and mutant (MT) siblings of the F<sub>1</sub> hybrids of *Oy1-N1989/oy1:B73* with respective maize diversity lines (MDL). Information on the inbred lines from maize association panel (referred to as 302) was adapted from Flint-Garcia *et al.* 2005.

**Table S5.** The summary of the HapMap3 variants before and after filtering to remove SNPs with minor allele frequency < 0.05 (5%) and missing > 0.1 (10%).



**Table S6.** The chlorophyll accumulation in the third fully-expanded leaf at the V3 stage of greenhouse-grown maize seedlings.

**Table S7.** Means and standard deviation of pigment absorbance (index) from mutant (*Oy1-N1989/oy1*) and wild-type plants grown at the Purdue Agronomy Farm.

**Table S8.** The trait correlations among the CCM traits in IBM x *Oy1-N1989/oy1*:B73 F<sub>1</sub> hybrid populations.

**Table S9.** The trait Correlations among the CCM traits in Syn10 x *Oy1-N1989/oy1*:B73 F<sub>1</sub> hybrid populations.

**Table S10.** The summary of the QTL detected for CCM traits in IBM x *Oy1-N1989/oy1*:B73 F<sub>1</sub> hybrid populations.

**Table S11.** The summary of the QTL detected from CCM traits in Syn10 x *Oy1-N1989/oy1*:B73 F<sub>1</sub> hybrid populations.

**Table S12.** Recombinants within the *vey1* region derived from Syn10 x *Oy1-N1989/oy1*:B73 F<sub>1</sub> populations.

**Table S13.** The trait correlations of various CCM traits using mean values of MDL x *Oy1-N1989/oy1*:B73 F<sub>1</sub> hybrid populations.

**Table S14.** The broad sense heritability and variance estimates of CCM traits measured in MDL x *Oy1-N1989/oy1*:B73 F<sub>1</sub> hybrid populations.

**Table S15.** The summary of the top four statistically significant SNP markers associated with CCM traits by GWAS and top SNP following the addition of S10\_9161643 as a covariate for each trait.

**Table S16.** Haplotypes at two SNPs at *vey1* locus associated with *Oy1-N1989* suppression and its effect on CCM traits in MDL x *Oy1-N1989/oy1*:B73 F<sub>1</sub> populations.

**Table S17.** The chlorophyll quantification of plants segregating for the allelic interaction between *Oy1-N1989* and *oy1-yg* alleles at *oy1*.

**Table S18.** The summary of the average CCM value of the F<sub>1</sub> hybrids of inbred lines crossed with *Oy1-N1989/oy1*:B73, and allelic state at the 6 bp (two amino acids) indel in the coding sequence of OY1 transcript in the respective parental inbred line.

**Table S19.** The linear regression of the top *vey1* linked marker (*isu085b*) and CCM traits from wild-type and mutant siblings of IBM x *Oy1-N1989/oy1*:B73 F<sub>1</sub> populations on to OY1 expression (RPKM values) of the respective IBM line (n=74).

**Table S20.** The allele expression bias at *oy1* in leaf tissue from the top fully-expanded leaf at the V3 stage.

**Table S21.** The chlorophyll approximation (using CCM) from the middle of the third leaf at the V3 stage on greenhouse-grown maize seedlings from a cross of B73, Mo17, and PH207 inbred lines (ear-parents) with *Oy1-N1989/oy1*:B73 plants (pollen-parent).

**Table S22.** The distribution of normalized OY1 expression in the emerging shoot tissue of maize diversity lines (Kremling *et al.* 2018) at two SNPs associated with suppression of *Oy1-N1989* phenotype in MDL x *Oy1-N1989/oy1*:B73 F<sub>1</sub> populations.

**Table S23.** The pairwise trait correlations between OY1 transcript abundance in the emerging shoots of maize inbred lines and the CCM traits of corresponding F<sub>1</sub> hybrids with *Oy1-N1989/oy1*:B73 for the 198 inbred lines common between the current study and Kremling *et al.* 2018.

## Supplemental figures

**Figure S1.** The linear regression of the chlorophyll pigment measurements using non-destructive CCM-200 plus meter (expressed as CCM index) and absolute chlorophyll pigment quantification using the spectrophotometric method from the same leaf.

**Figure S2.** The CCM quantification of the (a) mutant (*Oy1-N1989/oy1*), and (b) wild-type (*oy1/oy1*) siblings in B73, Mo17 x B73, and Mo17 (BC<sub>6</sub> generation) genetic background at 30 days after planting.

**Figure S3.** The pairwise scatter plot of primary trait measurements in IBM x *Oy1-N1989/oy1*:B73 F<sub>1</sub> populations.

**Figure S4.** The pairwise scatter plot of primary trait measurements in Syn10 x *Oy1-N1989/oy1*:B73 F<sub>1</sub> populations.

**Figure S5.** The CCMI and CCMII distribution in the wild-type (WT) and mutant (MT) siblings of (a) IBM x *Oy1-N1989/oy1*:B73 F<sub>1</sub> populations, (b) Syn10 x *Oy1-N1989/oy1*:B73 F<sub>1</sub> populations, and (c) MDL x *Oy1-N1989/oy1*:B73 F<sub>1</sub> populations.

**Figure S6.** The cartoon showing *vey1* validation in BM-NILs x *Oy1-N1989/oy1*:B73 F<sub>1</sub> populations.

**Figure S7.** The pairwise scatter plot of primary trait measurements in MDL x *Oy1-N1989/oy1*:B73 F<sub>1</sub> populations.

**Figure S8.** The chlorophyll approximation (using CCM) from the middle of the third leaf in the greenhouse grown F<sub>1</sub> maize seedlings from a cross of B73, Mo17, and PH207 inbred lines (ear-parents) with *Oy1-N1989/oy1*:B73 plants (pollen-parent) at the V3 developmental stage.

**Figure S9.** The proposed model for cis-acting regulatory variation as the basis of *vey1*.

## Supplemental files

1. S1\_IBM\_F1\_Rqtl\_input: CSV file with average CCM values and genotypic data of IBM x *Oy1-N1989/oy1*:B73 F<sub>1</sub> population formatted for R/qtl.
2. S2\_Syn10\_F1\_Rqtl\_input: CSV file with BLUP value of CCM traits and genotypic data of Syn10 x *Oy1-N1989/oy1*:B73 F<sub>1</sub> population formatted for R/qtl.

## Literature cited

- Adrian, J., S. Farrona, J. J. Reimer, M. C. Albani, G. Coupland *et al.*, 2010 Cis-Regulatory Elements and Chromatin State Coordinately Control Temporal and Spatial Expression of FLOWERING LOCUS T in Arabidopsis. *Plant Cell* 22: 1425–1440.
- Bates, D. M., M. Machler, B. M. Bolker, and S. C. Walker, 2015 Fitting Linear Mixed-Effects Models using lme4. *J. Stat. Softw.* 67: 1–48.
- Benjamini, Y., and Y. Hochberg, 1995 Controlling the False Discovery Rate: A Practical and Powerful Approach to Multiple Testing. *J. R. Stat. Soc. Ser. B* 57: 289–300.
- Berardo, N., O. V. Brenna, A. Amato, P. Valoti, V. Pisacane *et al.*, 2004 Carotenoids concentration among maize genotypes measured by near infrared reflectance spectroscopy (NIRS). *Innov. Food Sci. Emerg. Technol.* 5: 393–398.
- Birchler, J. A., and K. J. Newton, 1981 Modulation of protein levels in chromosomal dosage series of maize: the biochemical basis of aneuploid syndromes. *Genetics* 99: 247–266.
- Birchler, J. A., and R. A. Veitia, 2012 Gene balance hypothesis: Connecting issues of dosage sensitivity across biological disciplines. *Proc. Natl. Acad. Sci.* 109: 14746–14753.
- Bradbury, P. J., Z. Zhang, D. E. Kroon, T. M. Casstevens, Y. Ramdoss *et al.*, 2007 TASSEL: software for association mapping of complex traits in diverse samples. *Bioinformatics* 23: 2633–5.
- Brem, R. B., G. Yvert, R. Clinton, and L. Kruglyak, 2002 Genetic dissection of transcriptional regulation in budding yeast. *Science*. 296: 752–755.
- Broman, K. W., H. Wu, S. Sen, and G. a. Churchill, 2003 R/qtl: QTL mapping in experimental crosses. *Bioinformatics* 19: 889–890.
- Buescher, E. M., J. Moon, A. Runkel, S. Hake, and B. P. Dilkes, 2014 Natural Variation at sympathy for the ligule Controls Penetrance of the Semidominant Liguleless narrow-R Mutation in *Zea mays*. *G3* 4: 2297–2306.
- Bukowski, R., X. Guo, Y. Lu, C. Zou, B. He *et al.*, 2018 Construction of the third generation *Zea mays* haplotype map. *Gigascience* 7: 1–12.
- Bushnell, B., 2014 BBMap: A Fast, Accurate, Splice-Aware Aligner.:
- Chintamanani, S., S. H. Hulbert, G. S. Johal, and P. J. Balint-Kurti, 2010 Identification of a maize locus that modulates the hypersensitive defense response, using mutant-assisted gene identification and characterization. *Genetics* 184: 813–25.
- Christensen, C. A., S. W. Gorsich, R. H. Brown, L. G. Jones, J. Brown *et al.*, 2002 Mitochondrial GFA2 Is Required for Synergic Cell Death in Arabidopsis. *Plant Cell* 14: 2215–2232.
- Christensen, C. A., S. Subramanian, and G. N. Drews, 1998 Identification of Gametophytic Mutations Affecting Female Gametophyte Development in Arabidopsis. *Dev. Biol.* 202: 136–151.
- Churchill, G. A., and R. W. Doerge, 1994 Empirical threshold values for quantitative trait mapping. *Genetics* 138: 963–71.
- Clark, R. M., T. N. Wagler, P. Quijada, and J. Doebley, 2006 A distant upstream enhancer at the maize domestication gene *tb1* has pleiotropic effects on plant and inflorescent architecture. *Nat. Genet.* 38: 594–7.

- Danecek, P., A. Auton, G. Abecasis, C. A. Albers, E. Banks *et al.*, 2011 The variant call format and VCFtools. *Bioinformatics* 27: 2156–2158.
- DePristo, M. A., E. Banks, R. Poplin, K. V Garimella, J. R. Maguire *et al.*, 2011 A framework for variation discovery and genotyping using next-generation DNA sequencing data. *Nat. Genet.* 43: 491–498.
- Dilkes, B. P., M. Spielman, R. Weizbauer, B. Watson, D. Burkart-Waco *et al.*, 2008 The Maternally Expressed WRKY Transcription Factor TTG2 Controls Lethality in Interploidy Crosses of Arabidopsis. *PLoS Biol.* 6: 2707–2720.
- Eggermont, K., I. J. Goderis, and W. F. Broekaert, 1996 High-throughput RNA Extraction from Plant Samples Based on Homogenisation by Reciprocal Shaking in the Presence of a Mixture of Sand and Glass Beads. *Plant Mol. Biol. Report.* 14: 273–279.
- Eichten, S. R., J. M. Foerster, N. de Leon, Y. Kai, C.-T. Yeh *et al.*, 2011 B73-Mo17 near-isogenic lines demonstrate dispersed structural variation in maize. *Plant Physiol.* 156: 1679–90.
- Elshire, R. J., J. C. Glaubitz, Q. Sun, J. a Poland, K. Kawamoto *et al.*, 2011 A robust, simple genotyping-by-sequencing (GBS) approach for high diversity species. *PLoS One* 6(5): e19379.
- Fisher, R. ., 1921 On the “probable error” of a coefficient of correlation deduced from a small sample. *Metron* 1: 3–32.
- Fisher, R. A., 1930 *The genetical theory of natural selection*. Oxford, UK: Oxford University Press.
- Flint-Garcia, S. a, A.-C. Thuillet, J. Yu, G. Pressoir, S. M. Romero *et al.*, 2005 Maize association population: a high-resolution platform for quantitative trait locus dissection. *Plant J.* 44: 1054–1064.
- Fodje, M. N., A. Hansson, M. Hansson, J. G. Olsen, S. Gough *et al.*, 2001 Interplay between an AAA module and an integrin I domain may regulate the function of magnesium chelatase. *J. Mol. Biol.* 311: 111–122.
- Gibson, G., and B. Weir, 2005 The quantitative genetics of transcription. *Trends Genet.* 21: 616–623.
- Gray, J., P. S. Close, S. P. Briggs, and G. S. Johal, 1997 A novel suppressor of cell death in plants encoded by the *Lls1* gene of maize. *Cell* 89: 25–31.
- Gray, J., D. Janick-Buckner, B. Buckner, P. S. Close, and G. S. Johal, 2002 Light-dependent death of maize *lsl1* cells is mediated by mature chloroplasts. *Plant Physiol.* 130: 1894–1907.
- Grossniklaus, U., M. S. Madhusudhan, and V. Nanjundiah, 1996 Nonlinear Enzyme Kinetics Can Lead to High Metabolic Flux Control Coefficients: Implications for the Evolution of Dominance. *J. Theor. Biol.* 182: 299–302.
- Hansson, A., C. G. Kannangara, D. V Wettstein, and M. Hansson, 1999 Molecular basis for semidominance of missense mutations in the XANTHA-H (42-kDa) subunit of magnesium chelatase. *Proc. Natl. Acad. Sci. U. S. A.* 96: 1744–1749.
- Hansson, A., R. D. Willows, T. H. Roberts, and M. Hansson, 2002 Three semidominant barley mutants with single amino acid substitutions in the smallest magnesium chelatase subunit form defective AAA+ hexamers. *Proc. Natl. Acad. Sci. U. S. A.* 99: 13944–13949.
- Harjes, C. E., T. R. Rocheford, L. Bai, T. P. Brutnell, C. B. Kandianis *et al.*, 2008 Natural

- Genetic Variation in Lycopene Epsilon Cyclase Tapped for Maize Biofortification. *Science*. 319: 330–333.
- Holm, S., 1979 A simple sequentially rejective multiple test procedure. *Scand. J. Stat.* 6: 65–70.
- Huang, M., T. L. Slewinski, R. F. Baker, D. Janick-Buckner, B. Buckner *et al.*, 2009 Camouflage patterning in maize leaves results from a defect in porphobilinogen deaminase. *Mol. Plant* 2: 773–89.
- Hu, G., N. Yalpani, S. P. Briggs, and G. S. Johal, 1998 A porphyrin pathway impairment is responsible for the phenotype of a dominant disease lesion mimic mutant of maize. *Plant Cell* 10: 1095–1105.
- Hussain, T., P. Tausend, G. Graham, and J. Ho, 2007 Registration of IBM2 SYN10 Doubled Haploid Mapping Population of Maize. *J. Plant Regist.* 1: 81.
- Jacob, F., and J. Monod, 1961 Genetic regulatory mechanisms in the synthesis of proteins. *J. Mol. Biol.* 3: 318–356.
- Johal, G. S., P. Balint-Kurti, and C. F. Weil, 2008 Mining and Harnessing Natural Variation: A Little MAGIC. *Crop Sci.* 48: 2066.
- King, M.-C., and A. C. Wilson, 1975 Evolution at two levels in Humans and Chimpanzees. *Science*. 108: 107–116.
- Kremling, K. A. G., S.-Y. Chen, M.-H. Su, N. K. Lepak, M. C. Romay *et al.*, 2018 Dysregulation of expression correlates with rare-allele burden and fitness loss in maize. *Nature*. 55: 520–523.
- Lauter, A. N. M., M. G. Muszynski, R. D. Huffman, and M. P. Scott, 2017 A Pectin Methylesterase ZmPme3 Is Expressed in Gametophyte factor1-s (Gal-s) Silks and Maps to that Locus in Maize (*Zea mays* L.). *Front. Plant Sci.* 8: 1–11.
- Lee, M., N. Sharopova, W. D. Beavis, D. Grant, M. Katt *et al.*, 2002 Expanding the genetic map of maize with the intermated B73 x Mo17 (IBM) population. *Plant Mol. Biol.* 48: 453–61.
- Lemmon, Z. H., R. Bukowski, Q. Sun, and J. F. Doebley, 2014 The Role of cis Regulatory Evolution in Maize Domestication. *PLoS Genet.* 10:.
- Li, H., and R. Durbin, 2009 Fast and accurate short read alignment with Burrows-Wheeler transform. *Bioinformatics* 25: 1754–1760.
- Li, H., B. Handsaker, A. Wysoker, T. Fennell, J. Ruan *et al.*, 2009 The Sequence Alignment/Map format and SAMtools. *Bioinformatics* 25: 2078–2079.
- Li, L., K. Petsch, R. Shimizu, S. Liu, W. W. Xu *et al.*, 2018 Correction: Mendelian and Non-Mendelian Regulation of Gene Expression in Maize. *PLoS Genet.* 1–4.
- Li, L., K. Petsch, R. Shimizu, S. Liu, W. W. Xu *et al.*, 2013 Mendelian and non-Mendelian regulation of gene expression in maize. *PLoS Genet.* 9: e1003202.
- Li, X., E. Svedin, H. Mo, S. Atwell, B. P. Dilkes *et al.*, 2014 Exploiting natural variation of secondary metabolism identifies a gene controlling the glycosylation diversity of dihydroxybenzoic acids in *Arabidopsis thaliana*. *Genetics* 198: 1267–1276.
- Lichtenthaler, H. K., and C. Buschmann, 2001 Chlorophylls and Carotenoids: measurement and characterization by UV-VIS spectroscopy. *Curr. Protoc. Food Anal. Chem.* F4.3.1-F4.3.8.
- Lin, C. Y., and F. R. Allaire, 1977 Heritability of a linear combination of traits. *Theor. Appl. Genet.* 51: 1–3.
- Lipka, A. E., F. Tian, Q. Wang, J. Peiffer, M. Li *et al.*, 2012 GAPIT: genome association

- and prediction integrated tool. *Bioinformatics* 28: 2397–9.
- Liu, H., Y. Niu, P. J. Gonzalez-Portilla, H. Zhou, L. Wang *et al.*, 2015 An ultra-high-density map as a community resource for discerning the genetic basis of quantitative traits in maize. *BMC Genomics* 16: 1078.
- Lundqvist, J., I. Braumann, M. Kurowska, A. H. Müller, and M. Hansson, 2013 Catalytic turnover triggers exchange of subunits of the magnesium chelatase AAA+ motor unit. *J. Biol. Chem.* 288: 24012–24019.
- Mach, J. M., A. R. Castillo, R. Hoogstraten, and J. T. Greenberg, 2001 The Arabidopsis-accelerated cell death gene ACD2 encodes red chlorophyll catabolite reductase and suppresses the spread of disease symptoms. *Proc. Natl. Acad. Sci.* 98: 771–776.
- Mangelsdorf, P. ., and D. . Jones, 1926 The expression of mendelian factors in the gametophyte of maize. *Genetics* 11: 423–455.
- McClintock, B., 1956a Controlling elements and the gene. *Cold Spring Harb. Symp. Quant. Biol.* 21: 197–216.
- McClintock, B., 1956b Intranuclear systems controlling gene action and mutation. *Brookhaven Symp. Biol.* 8: 58–74.
- McClintock, B., 1961 Some Parallels Between Gene Control Systems in Maize and in Bacteria. *Am. Nat.* 95: 265–277.
- McClintock, B., 1950 The origin and behavior of mutable loci in maize. *PNAS* 36: 344–355.
- Meskauskiene, R., M. Nater, D. Goslings, F. Kessler, R. op den Camp *et al.*, 2001 FLU: A negative regulator of chlorophyll biosynthesis in *Arabidopsis thaliana*. *Proc. Natl. Acad. Sci.* 98: 12826–12831.
- Neff, M. M., E. Turk, and M. Kalishman, 2002 Web-based primer design for single nucleotide polymorphism analysis. *Trends Genet.* 18: 613–615.
- Ohno, S., 1972 An argument for the genetic simplicity of man and other mammals. *J. Hum. Evol.* 1: 651–662.
- Olukolu, B. A., Y. Bian, B. De Vries, W. F. Tracy, R. J. Wisser *et al.*, 2016 The Genetics of Leaf Flecking in Maize and Its Relationship to Plant Defense and Disease Resistance. *Plant Physiol.* 172: 1787–1803.
- Olukolu, B. A., A. Negeri, R. Dhawan, B. P. Venkata, P. Sharma *et al.*, 2013 A connected set of genes associated with programmed cell death implicated in controlling the hypersensitive response in maize. *Genetics* 193: 609–620.
- Olukolu, B. A., G.-F. Wang, V. Vontimitta, B. P. Venkata, S. Marla *et al.*, 2014 A genome-wide association study of the maize hypersensitive defense response identifies genes that cluster in related pathways. *PLoS Genet.* 10: 1–15.
- Orr, H. A., 2005 The genetic theory of adaptation: A brief history. *Nat. Rev. Genet.* 6: 119–127.
- Orr, H. A., 1998 The Population Genetics of Adaptation: The Distribution of Factors Fixed during Adaptive Evolution. *Evolution (N. Y.)* 52: 935–949.
- Penning, B. W., G. S. Johal, and M. D. McMullen, 2004 A major suppressor of cell death, *slm1*, modifies the expression of the maize (*Zea mays* L.) lesion mimic mutation *les23*. *Genome* 47: 961–969.
- Peterson, P. A., 1953 A study of a mutable pale green locus in maize: University of Illinois. Ph.D. Dissertation.
- Pribat, A., I. K. Blaby, A. Lara-Núñez, L. Jeanguenin, R. Fouquet *et al.*, 2011 A 5-



- formyltetrahydrofolate cycloligase paralog from all domains of life: Comparative genomic and experimental evidence for a cryptic role in thiamin metabolism. *Funct. Integr. Genomics* 11: 467–478.
- Robinson, J. T., H. Thorvaldsdóttir, W. Winckler, M. Guttman, E. S. Lander *et al.*, 2011 Integrative Genome Viewer. *Nat. Biotechnol.* 29: 24–6.
- Romay, M. C., M. J. Millard, J. C. Glaubitz, J. a Peiffer, K. L. Swarts *et al.*, 2013 Comprehensive genotyping of the USA national maize inbred seed bank. *Genome Biol.* 14: R55.
- Salvi, S., G. Sponza, M. Morgante, D. Tomes, X. Niu *et al.*, 2007 Conserved noncoding genomic sequences associated with a flowering-time quantitative trait locus in maize. *Proc. Natl. Acad. Sci. U. S. A.* 104: 11376–11381.
- SanMiguel, P., and J. L. Bennetzen, 1998 Evidence that a Recent Increase in Maize Genome Size was Caused by the Massive Amplification of Intergene Retrotransposons. *Ann. Bot.* 82: 37–44.
- SanMiguel, P., A. Tikhonov, Y.-K. Jin, N. Motchoulskaia, D. Zakharov *et al.*, 1996 Nested Retrotransposons in the Intergenic regions of the maize genome. *Science.* 274: 765–768.
- Sawers, R. J. H., J. Viney, P. R. Farmer, R. R. Bussey, G. Olsefski *et al.*, 2006 The maize Oil yellow1 (Oy1) gene encodes the I subunit of magnesium chelatase. *Plant Mol. Biol.* 60: 95–106.
- Schwartz, C., S. Balasubramanian, N. Warthmann, T. P. Michael, J. Lempe *et al.*, 2009 Cis-regulatory changes at Flowering Locus T mediate natural variation in flowering responses of *Arabidopsis thaliana*. *Genetics* 183: 723–732.
- Sen, T. Z., L. C. Harper, M. L. Schaeffer, C. M. Andorf, T. E. Seigfried *et al.*, 2010 Choosing a genome browser for a Model Organism Database: surveying the Maize community. *Database* 2010: 1–9.
- Springer, N. M., and R. M. Stupar, 2007 Allelic variation and heterosis in maize: how do two halves make more than a whole? *Genome Res.* 17: 264–75.
- Studer, A., Q. Zhao, J. Ross-Ibarra, and J. Doebley, 2011 Identification of a functional transposon insertion in the maize domestication gene *tb1*. *Nat. Genet.* 43: 1160–1163.
- Thimijan, R. W., and R. D. Heins, 1983 Photometric, radiometric, and quantum light units of measure: a review of procedures for interconversion. *HortScience* 18: 818–822.
- Thompson, J. D., D. G. Higgins, and T. J. Gibson, 1994 ClustalW: improving the sensitivity of progressive multiple sequence alignment through sequence weighting, position specific gap penalties and weight matrix choice. *Nucleic Acids Res. Acids Res* 22: 4673–4680.
- Vale, R. D., 2000 AAA proteins: Lords of the ring. *J. Cell Biol.* 150: 13–19.
- Veitia, R. A., 2003 Nonlinear effects in macromolecular assembly and dosage sensitivity. *J. Theor. Biol.* 220: 19–25.
- Waters, A. J., I. Makarevitch, J. Noshay, L. T. Burghardt, C. N. Hirsch *et al.*, 2017 Natural variation for gene expression responses to abiotic stress in maize. *Plant J.* 89: 706–717.
- West, M. A. L., K. Kim, D. J. Kliebenstein, H. Van Leeuwen, R. W. Michelmore *et al.*, 2007 Global eQTL mapping reveals the complex genetic architecture of transcript-



- level variation in Arabidopsis. *Genetics* 175: 1441–1450.
- Wettstein, D. von, S. Gough, and C. G. Kannangara, 1995 Chlorophyll Biosynthesis. *Plant Cell* 7: 1039–1057.
- Willing, M. C., S. P. Deschenes, R. L. Slayton, and E. J. Roberts, 1996 Premature chain termination is a unifying mechanism for COL1A1 null alleles in osteogenesis imperfecta type I cell strains. *Am. J. Hum. Genet.* 59: 799–809.
- Wray, G. A., M. W. Hahn, E. Abouheif, J. P. Balhoff, M. Pizer *et al.*, 2003 The evolution of transcriptional regulation in eukaryotes. *Mol. Biol. Evol.* 20: 1377–1419.
- Yang, M., E. Wardzala, G. S. Johal, and J. Gray, 2004 The wound-inducible Lls1 gene from maize is an orthologue of the Arabidopsis Acd1 gene, and the LLS1 protein is present in non-photosynthetic tissues. *Plant Mol. Biol.* 0: 1–17.
- Yu, J., G. Pressoir, W. H. Briggs, I. Vroh Bi, M. Yamasaki *et al.*, 2006 A unified mixed-model method for association mapping that accounts for multiple levels of relatedness. *Nat. Genet.* 38: 203–8.
- Zhang, Z., E. Ersoz, C.-Q. Lai, R. J. Todhunter, H. K. Tiwari *et al.*, 2010 Mixed linear model approach adapted for genome-wide association studies. *Nat. Genet.* 42: 355–60.

# Tables

***A Very Oil Yellow1* modifier of the *Oil Yellow1-N1989* allele uncovers a cryptic phenotypic impact of cis-regulatory variation in maize**

Rajdeep S. Khangura, Sandeep Marla, Bala P. Venkata, Nicholas J. Heller, Gurmukh S. Johal, Brian P. Dilkes

Table 1. The allele-specific expression at *oyl* in the top fully-expanded leaf at the V3 developmental stage of B73 x Mo17 F<sub>1</sub> wild-type and *OyI-N1989/oyl* mutant siblings, and inbred *OyI-N1989/oyl*:B73 mutants.

| Genotype <sup>1</sup>                | SNP_252 | SNP_317 | Ratio_SNP252           | Ratio_SNP317           | Average                |
|--------------------------------------|---------|---------|------------------------|------------------------|------------------------|
| <i>oyl/oyl</i> :B/M <sup>&amp;</sup> | .       | .       | .                      | .                      | 1.19±0.07              |
| <i>oyl/oyl</i> :B/M                  | C/C     | C/T     | .                      | 1.08±0.01 <sup>a</sup> | 1.08±0.01 <sup>a</sup> |
| <i>OyI-N1989/oyl</i> :M/B            | C/T     | C/T     | 1.12±0.01 <sup>a</sup> | 1.10±0.02 <sup>a</sup> | 1.11±0.01 <sup>a</sup> |
| <i>OyI-N1989/oyl</i> :B/M            | C/T     | C/T     | 1.15±0.03 <sup>a</sup> | 1.10±0.01 <sup>a</sup> | 1.13±0.02 <sup>a</sup> |
| <i>OyI-N1989/oyl</i> :B              | C/T     | C/C     | 1.01±0.02 <sup>b</sup> | .                      | 1.01±0.02 <sup>b</sup> |

<sup>1</sup>B73 is denoted as B, Mo17 is denoted as M, B/M denotes B73 x Mo17 cross direction and M/B is vice-versa. The mean ± standard deviation of the ratios of the read count from the reference/alternate allele at SNP\_252, SNP\_317, and the average of the ratios at SNP position 252 and 317. The connecting letter report for each trait indicates the statistical significance calculated using ANOVA with post-hoc analysis using Tukey's HSD with p<0.01.

<sup>&</sup>Data obtained from Waters et al. 2017.

# **Supplemental Tables**

Table S1. The trait mean values of the CCM traits for the wild-type (WT) and mutant (MT) siblings of the F<sub>1</sub> hybrids of *OyI-N1989/oyI:B73* (pollen-parent) with respective IBM lines.

| IBM ID | WT CCM I | MT CCM I | Ratio CCM I | Diff CCM I | WT CCM II | MT CCM II | Ratio CCM II | Diff CCM II |
|--------|----------|----------|-------------|------------|-----------|-----------|--------------|-------------|
| M0001  | 45.3     | 6.3      | 0.139       | 39         | 49.6      | 17.5      | 0.353        | 32.1        |
| M0003  | 35.5     | 8.3      | 0.234       | 27.2       | 37.3      | 16.2      | 0.434        | 21.1        |
| M0007  | 46.8     | 4        | 0.085       | 42.8       | 54.8      | 5.8       | 0.106        | 49          |
| M0008  | 47.4     | 10.3     | 0.217       | 37.1       | 51.9      | 16.1      | 0.31         | 35.8        |
| M0010  | 48.2     | 11.4     | 0.237       | 36.8       | 42.9      | 18.6      | 0.434        | 24.3        |
| M0013  | 33.7     | 8.7      | 0.258       | 25         | 47.7      | 16.3      | 0.342        | 31.4        |
| M0014  | 54.6     | 3.5      | 0.064       | 51.1       | 47.3      | 5.1       | 0.108        | 42.2        |
| M0016  | 52.3     | 3.2      | 0.061       | 49.1       | 43.9      | 6.2       | 0.141        | 37.7        |
| M0017  | 54.3     | 9.3      | 0.171       | 45         | 67.9      | 21.4      | 0.315        | 46.5        |
| M0018  | 34.3     | 8        | 0.233       | 26.3       | 51.2      | 18.2      | 0.355        | 33          |
| M0019  | 36.9     | 8.4      | 0.228       | 28.5       | 40.9      | 14.5      | 0.355        | 26.4        |
| M0021  | 50.1     | 3.6      | 0.072       | 46.5       | 65.4      | 5.4       | 0.083        | 60          |
| M0022  | 46.3     | 8.6      | 0.186       | 37.7       | 45.7      | 15.8      | 0.346        | 29.9        |
| M0023  | 47.9     | 3.1      | 0.065       | 44.8       | 55.2      | 3.8       | 0.069        | 51.4        |
| M0024  | 47.1     | 8.6      | 0.183       | 38.5       | 50.3      | 19.2      | 0.382        | 31.1        |
| M0025  | 49.6     | 3.6      | 0.073       | 46         | 57.9      | 6.9       | 0.119        | 51          |
| M0028  | 35       | 4.3      | 0.123       | 30.7       | 52.5      | 5.5       | 0.105        | 47          |
| M0029  | 47.8     | 11.8     | 0.247       | 36         | 41.9      | 19.6      | 0.468        | 22.3        |
| M0031  | 41.9     | 3.2      | 0.076       | 38.7       | 54.9      | 5.2       | 0.095        | 49.7        |
| M0032  | 57.9     | 4        | 0.069       | 53.9       | 52.3      | 7.1       | 0.136        | 45.2        |
| M0033  | 46.5     | 12       | 0.258       | 34.5       | 52.9      | 19.5      | 0.369        | 33.4        |
| M0036  | 39       | 3.3      | 0.085       | 35.7       | 54        | 4.6       | 0.085        | 49.4        |
| M0039  | 52.6     | 4.1      | 0.078       | 48.5       | 52.4      | 5.7       | 0.109        | 46.7        |
| M0040  | 42.2     | 11       | 0.261       | 31.2       | 62.9      | 22.5      | 0.358        | 40.4        |
| M0042  | 53       | 10       | 0.189       | 43         | 47.4      | 18.6      | 0.392        | 28.8        |
| M0044  | 42.8     | 2.8      | 0.065       | 40         | 52.7      | 4.4       | 0.083        | 48.3        |

| IBM ID | WT_CCM I | MT_CCM I | Ratio_CCM I | Diff_CCM I | WT_CCM II | MT_CCM II | Ratio_CCM II | Diff_CCM II |
|--------|----------|----------|-------------|------------|-----------|-----------|--------------|-------------|
| M0045  | 41.8     | 6.9      | 0.165       | 34.9       | 42.4      | 12.6      | 0.297        | 29.8        |
| M0047  | 35.7     | 4        | 0.112       | 31.7       | 36.7      | 8.1       | 0.221        | 28.6        |
| M0048  | 30.3     | 6.4      | 0.211       | 23.9       | 35.5      | 18.2      | 0.513        | 17.3        |
| M0051  | 40.2     | 4        | 0.1         | 36.2       | 45.6      | 7.3       | 0.16         | 38.3        |
| M0052  | 53.1     | 10.7     | 0.202       | 42.4       | 56.3      | 15.5      | 0.275        | 40.8        |
| M0054  | 50.6     | 8.4      | 0.166       | 42.2       | 43.7      | 13.9      | 0.318        | 29.8        |
| M0055  | 38.6     | 16.9     | 0.438       | 21.7       | 37.7      | 24.5      | 0.65         | 13.2        |
| M0056  | 41.6     | 8.8      | 0.212       | 32.8       | 44.9      | 18        | 0.401        | 26.9        |
| M0057  | 47.9     | 9.2      | 0.192       | 38.7       | 45.4      | 19.6      | 0.432        | 25.8        |
| M0060  | 44.3     | 3.7      | 0.084       | 40.6       | 54.9      | 6         | 0.109        | 48.9        |
| M0061  | 43.3     | 11.2     | 0.259       | 32.1       | 64.7      | 29.3      | 0.453        | 35.4        |
| M0062  | 43       | 11.4     | 0.265       | 31.6       | 62        | 20.6      | 0.332        | 41.4        |
| M0063  | 55.5     | 11.6     | 0.209       | 43.9       | 55.2      | 20.5      | 0.371        | 34.7        |
| M0066  | 47.9     | 9.1      | 0.19        | 38.8       | 50.4      | 21.5      | 0.427        | 28.9        |
| M0067  | 41.3     | 8.6      | 0.208       | 32.7       | 44.9      | 13.6      | 0.303        | 31.3        |
| M0074  | 48.5     | 3.7      | 0.076       | 44.8       | 48.5      | 4.9       | 0.101        | 43.6        |
| M0076  | 56       | 3.9      | 0.07        | 52.1       | 64        | 6.5       | 0.102        | 57.5        |
| M0077  | 49.1     | 3.1      | 0.063       | 46         | 44        | 6.7       | 0.152        | 37.3        |
| M0079  | 42.9     | 9.9      | 0.231       | 33         | 46.4      | 18.3      | 0.394        | 28.1        |
| M0080  | 39.2     | 6.1      | 0.156       | 33.1       | 52.6      | 15.4      | 0.293        | 37.2        |
| M0081  | 41       | 3.3      | 0.08        | 37.7       | 58.3      | 5.4       | 0.093        | 52.9        |
| M0082  | 45.5     | 3.2      | 0.07        | 42.3       | 58        | 4.9       | 0.084        | 53.1        |
| M0083  | 49.2     | 9.9      | 0.201       | 39.3       | 54.7      | 22.8      | 0.417        | 31.9        |
| M0085  | 41.7     | 3.8      | 0.091       | 37.9       | 36.3      | 3.7       | 0.102        | 32.6        |
| M0086  | 58.4     | 9.5      | 0.163       | 48.9       | 65.2      | 24.8      | 0.38         | 40.4        |
| M0088  | 48.2     | 11.4     | 0.237       | 36.8       | 53.8      | 27        | 0.502        | 26.8        |
| M0092  | 53.7     | 10.4     | 0.194       | 43.3       | 60.5      | 27.5      | 0.455        | 33          |
| M0093  | 51.4     | 6.7      | 0.13        | 44.7       | 51.9      | 12.6      | 0.243        | 39.3        |

| IBM ID | WT_CCM I | MT_CCM I | Ratio_CCM I | Diff_CCM I | WT_CCM II | MT_CCM II | Ratio_CCM II | Diff_CCM II |
|--------|----------|----------|-------------|------------|-----------|-----------|--------------|-------------|
| M0097  | 48       | 4.9      | 0.102       | 43.1       | 56.9      | 7.4       | 0.13         | 49.5        |
| M0098  | 49.5     | 7.4      | 0.149       | 42.1       | 64.9      | 17.5      | 0.27         | 47.4        |
| M0099  | 59.8     | 3.1      | 0.052       | 56.7       | 55        | 6         | 0.109        | 49          |
| M0101  | 41.8     | 8.4      | 0.201       | 33.4       | 50.1      | 22.7      | 0.453        | 27.4        |
| M0106  | 44.1     | 5.5      | 0.125       | 38.6       | 51        | 16.8      | 0.329        | 34.2        |
| M0109  | 43.1     | 7.3      | 0.169       | 35.8       | 52.9      | 18.4      | 0.348        | 34.5        |
| M0110  | 43.9     | 4        | 0.091       | 39.9       | 46.5      | 7.1       | 0.153        | 39.4        |
| M0113  | 53.8     | 10.1     | 0.188       | 43.7       | 59.4      | 24.5      | 0.412        | 34.9        |
| M0114  | 36.3     | 7.4      | 0.204       | 28.9       | 52.3      | 20.8      | 0.398        | 31.5        |
| M0116  | 46.6     | 8.7      | 0.187       | 37.9       | 50.2      | 16.5      | 0.329        | 33.7        |
| M0118  | 43.2     | 10.1     | 0.234       | 33.1       | 39.8      | 18.7      | 0.47         | 21.1        |
| M0119  | 42.7     | 4.3      | 0.101       | 38.4       | 46.5      | 6.4       | 0.138        | 40.1        |
| M0121  | 51.8     | 10       | 0.193       | 41.8       | 43.7      | 19.5      | 0.446        | 24.2        |
| M0124  | 35.8     | 8        | 0.223       | 27.8       | 39.4      | 18        | 0.457        | 21.4        |
| M0125  | 39.6     | 10.6     | 0.268       | 29         | 40.1      | 16        | 0.399        | 24.1        |
| M0127  | 57.4     | 7        | 0.122       | 50.4       | 49.6      | 24.1      | 0.486        | 25.5        |
| M0129  | 49.4     | 3.6      | 0.073       | 45.8       | 41.5      | 6         | 0.145        | 35.5        |
| M0130  | 45.7     | 8.1      | 0.177       | 37.6       | 51.5      | 23.3      | 0.452        | 28.2        |
| M0131  | 39.5     | 10       | 0.253       | 29.5       | 62.2      | 26        | 0.418        | 36.2        |
| M0133  | 43.2     | 2.8      | 0.065       | 40.4       | 56.3      | 4.7       | 0.083        | 51.6        |
| M0134  | 43.2     | 6.3      | 0.146       | 36.9       | 42.9      | 11.2      | 0.261        | 31.7        |
| M0138  | 50.3     | 9.8      | 0.195       | 40.5       | 47.9      | 24.7      | 0.516        | 23.2        |
| M0141  | 37.5     | 2        | 0.053       | 35.5       | 41.8      | 3.7       | 0.089        | 38.1        |
| M0142  | 45.3     | 8.4      | 0.185       | 36.9       | 62.3      | 15.5      | 0.249        | 46.8        |
| M0146  | 48.8     | 9.8      | 0.201       | 39         | 52.3      | 15.9      | 0.304        | 36.4        |
| M0147  | 44.8     | 3.5      | 0.078       | 41.3       | 46.3      | 6.7       | 0.145        | 39.6        |
| M0153  | 52.1     | 9.7      | 0.186       | 42.4       | 47.3      | 14.5      | 0.307        | 32.8        |
| M0154  | 49       | 3.3      | 0.067       | 45.7       | 55.6      | 6         | 0.108        | 49.6        |



| IBM ID | WT_CCM I | MT_CCM I | Ratio_CCM I | Diff_CCM I | WT_CCM II | MT_CCM II | Ratio_CCM II | Diff_CCM II |
|--------|----------|----------|-------------|------------|-----------|-----------|--------------|-------------|
| M0156  | 51.4     | 10.3     | 0.2         | 41.1       | 74.1      | 16        | 0.216        | 58.1        |
| M0157  | 49.4     | 9.7      | 0.196       | 39.7       | 61.3      | 20.7      | 0.338        | 40.6        |
| M0159  | 47       | 10.2     | 0.217       | 36.8       | 50        | 12.3      | 0.246        | 37.7        |
| M0160  | 36.3     | 4.2      | 0.116       | 32.1       | 57        | 7.5       | 0.132        | 49.5        |
| M0161  | 44.8     | 3.3      | 0.074       | 41.5       | 53.9      | 7.4       | 0.137        | 46.5        |
| M0162  | 54       | 3.8      | 0.07        | 50.2       | 56.7      | 5.6       | 0.099        | 51.1        |
| M0165  | 51.3     | 3.2      | 0.062       | 48.1       | 51        | 6         | 0.118        | 45          |
| M0168  | 46.4     | 4.1      | 0.088       | 42.3       | 45.9      | 8.4       | 0.183        | 37.5        |
| M0169  | 44.8     | 11.7     | 0.261       | 33.1       | 49.1      | 21        | 0.428        | 28.1        |
| M0170  | 43.1     | 8.1      | 0.188       | 35         | 46.1      | 25        | 0.542        | 21.1        |
| M0171  | 45.9     | 8.5      | 0.185       | 37.4       | 48.7      | 26.7      | 0.548        | 22          |
| M0174  | 54       | 3.5      | 0.065       | 50.5       | 60.9      | 8.7       | 0.143        | 52.2        |
| M0176  | 30.1     | 3.5      | 0.116       | 26.6       | 49.1      | 5.1       | 0.104        | 44          |
| M0177  | 40.6     | 3.5      | 0.086       | 37.1       | 53.1      | 5.2       | 0.098        | 47.9        |
| M0178  | 45.9     | 8.8      | 0.192       | 37.1       | 55.1      | 23.4      | 0.425        | 31.7        |
| M0180  | 45       | 8.1      | 0.18        | 36.9       | 52.5      | 17.9      | 0.341        | 34.6        |
| M0181  | 38.7     | 8.3      | 0.214       | 30.4       | 72.7      | 17        | 0.234        | 55.7        |
| M0182  | 37.1     | 3.5      | 0.094       | 33.6       | 48.6      | 7         | 0.144        | 41.6        |
| M0183  | 42       | 7.5      | 0.179       | 34.5       | 44.3      | 16.5      | 0.372        | 27.8        |
| M0184  | 55       | 4.7      | 0.085       | 50.3       | 56.4      | 8.6       | 0.152        | 47.8        |
| M0185  | 35.7     | 6.6      | 0.185       | 29.1       | 38.6      | 12        | 0.311        | 26.6        |
| M0186  | 25       | 2.5      | 0.1         | 22.5       | 51.7      | 3.8       | 0.074        | 47.9        |
| M0189  | 50.1     | 13       | 0.259       | 37.1       | 50.8      | 17.3      | 0.341        | 33.5        |
| M0191  | 50.2     | 3.8      | 0.076       | 46.4       | 55.4      | 6         | 0.108        | 49.4        |
| M0192  | 42.5     | 2.6      | 0.061       | 39.9       | 46.2      | 3.9       | 0.084        | 42.3        |
| M0194  | 48.2     | 12.4     | 0.257       | 35.8       | 51.8      | 17.8      | 0.344        | 34          |
| M0195  | 43       | 8.6      | 0.2         | 34.4       | 43.5      | 18.3      | 0.421        | 25.2        |
| M0196  | 46.1     | 10.5     | 0.228       | 35.6       | 62.5      | 26.3      | 0.421        | 36.2        |

| IBM ID | WT_CCM I | MT_CCM I | Ratio_CCM I | Diff_CCM I | WT_CCM II | MT_CCM II | Ratio_CCM II | Diff_CCM II |
|--------|----------|----------|-------------|------------|-----------|-----------|--------------|-------------|
| M0197  | 52.8     | 8.3      | 0.157       | 44.5       | 60.5      | 22.2      | 0.367        | 38.3        |
| M0198  | 55.4     | 8.9      | 0.161       | 46.5       | 65.5      | 21.9      | 0.334        | 43.6        |
| M0199  | 49.7     | 9.2      | 0.185       | 40.5       | 50.4      | 21.4      | 0.425        | 29          |
| M0200  | 41.4     | 9.1      | 0.22        | 32.3       | 45.4      | 19.1      | 0.421        | 26.3        |
| M0201  | 40.6     | 3.4      | 0.084       | 37.2       | 40.1      | 5.7       | 0.142        | 34.4        |
| M0204  | 35.9     | 3.8      | 0.106       | 32.1       | 38.9      | 5.9       | 0.152        | 33          |
| M0205  | 39.4     | 5.7      | 0.145       | 33.7       | 41.8      | 13.6      | 0.325        | 28.2        |
| M0206  | 53.2     | 9.7      | 0.182       | 43.5       | 45.3      | 18        | 0.397        | 27.3        |
| M0208  | 54.7     | 10.1     | 0.185       | 44.6       | 53.2      | 18.6      | 0.35         | 34.6        |
| M0209  | 54.7     | 10.9     | 0.199       | 43.8       | 52.2      | 18.8      | 0.36         | 33.4        |
| M0214  | 51.1     | 9.5      | 0.186       | 41.6       | 59.8      | 19.8      | 0.331        | 40          |
| M0215  | 45       | 4        | 0.089       | 41         | 60.2      | 6.2       | 0.103        | 54          |
| M0216  | 42.2     | 10.3     | 0.244       | 31.9       | 51.4      | 23        | 0.447        | 28.4        |
| M0218  | 52.1     | 3.3      | 0.063       | 48.8       | 56.1      | 5.4       | 0.096        | 50.7        |
| M0219  | 43.4     | 10.2     | 0.235       | 33.2       | 53.5      | 14.1      | 0.264        | 39.4        |
| M0220  | 42.7     | 8.3      | 0.194       | 34.4       | 51.1      | 18.2      | 0.356        | 32.9        |
| M0222  | 49       | 11.2     | 0.229       | 37.8       | 42.6      | 21.9      | 0.514        | 20.7        |
| M0223  | 47.7     | 7.7      | 0.161       | 40         | 67        | 18.4      | 0.275        | 48.6        |
| M0224  | 50       | 8.7      | 0.174       | 41.3       | 58.5      | 28.6      | 0.489        | 29.9        |
| M0225  | 44.2     | 3.6      | 0.081       | 40.6       | 45.1      | 5.5       | 0.122        | 39.6        |
| M0228  | 36.6     | 9.9      | 0.27        | 26.7       | 38.8      | 15.5      | 0.399        | 23.3        |
| M0229  | 45.7     | 10.9     | 0.239       | 34.8       | 45.9      | 20.1      | 0.438        | 25.8        |
| M0232  | 42.6     | 9.9      | 0.232       | 32.7       | 45.4      | 17.5      | 0.385        | 27.9        |
| M0233  | 39.9     | 6.7      | 0.168       | 33.2       | 48.6      | 15.1      | 0.311        | 33.5        |
| M0237  | 59.3     | 3.5      | 0.059       | 55.8       | 47        | 6.6       | 0.14         | 40.4        |
| M0240  | 57.3     | 3.2      | 0.056       | 54.1       | 57.6      | 6.7       | 0.116        | 50.9        |
| M0241  | 42.7     | 8.9      | 0.208       | 33.8       | 49        | 15.3      | 0.312        | 33.7        |
| M0244  | 54.6     | 4.1      | 0.075       | 50.5       | 51.8      | 5.3       | 0.102        | 46.5        |

| IBM ID | WT_CCM I | MT_CCM I | Ratio_CCM I | Diff_CCM I | WT_CCM II | MT_CCM II | Ratio_CCM II | Diff_CCM II |
|--------|----------|----------|-------------|------------|-----------|-----------|--------------|-------------|
| M0248  | 44.3     | 10.6     | 0.239       | 33.7       | 66.4      | 22.3      | 0.336        | 44.1        |
| M0250  | 44.3     | 3        | 0.068       | 41.3       | 61.5      | 3.8       | 0.062        | 57.7        |
| M0253  | 47.3     | 2.9      | 0.061       | 44.4       | 41.5      | 4.6       | 0.111        | 36.9        |
| M0255  | 39.9     | 3.1      | 0.078       | 36.8       | 44.8      | 4.8       | 0.107        | 40          |
| M0256  | 48.8     | 3.2      | 0.066       | 45.6       | 57.7      | 5.4       | 0.094        | 52.3        |
| M0258  | 41.9     | 6.6      | 0.158       | 35.3       | 54.2      | 24.8      | 0.458        | 29.4        |
| M0262  | 48.8     | 3.7      | 0.076       | 45.1       | 56        | 5         | 0.089        | 51          |
| M0263  | 40.9     | 3.2      | 0.078       | 37.7       | 63.2      | 4.5       | 0.071        | 58.7        |
| M0264  | 50.2     | 3.7      | 0.074       | 46.5       | 50.7      | 5.5       | 0.108        | 45.2        |
| M0265  | 43.1     | 7.4      | 0.172       | 35.7       | 56.8      | 15.5      | 0.273        | 41.3        |
| M0266  | 44.1     | 9        | 0.204       | 35.1       | 52.2      | 17.5      | 0.335        | 34.7        |
| M0267  | 47.9     | 7.6      | 0.159       | 40.3       | 45.7      | 13.7      | 0.3          | 32          |
| M0269  | 44       | 8.6      | 0.195       | 35.4       | 50.1      | 18.6      | 0.371        | 31.5        |
| M0270  | 66.2     | 12.3     | 0.186       | 53.9       | 56.5      | 23.6      | 0.418        | 32.9        |
| M0271  | 47.4     | 12.7     | 0.268       | 34.7       | 51.4      | 21.8      | 0.424        | 29.6        |
| M0272  | 43.6     | 4        | 0.092       | 39.6       | 55.5      | 4.8       | 0.086        | 50.7        |
| M0274  | 43.1     | 8.9      | 0.206       | 34.2       | 46.5      | 23.5      | 0.505        | 23          |
| M0275  | 52.9     | 5.9      | 0.112       | 47         | 47.1      | 13.7      | 0.291        | 33.4        |
| M0276  | 50.6     | 7        | 0.138       | 43.6       | 57.2      | 14.6      | 0.255        | 42.6        |
| M0277  | 47.4     | 9.1      | 0.192       | 38.3       | 52.3      | 27.8      | 0.532        | 24.5        |
| M0279  | 38.8     | 3.5      | 0.09        | 35.3       | 40        | 6.1       | 0.153        | 33.9        |
| M0280  | 43.6     | 9        | 0.206       | 34.6       | 36.2      | 15.8      | 0.436        | 20.4        |
| M0282  | 44.8     | 3.2      | 0.071       | 41.6       | 42.6      | 5.9       | 0.138        | 36.7        |
| M0286  | 61.7     | 3.1      | 0.05        | 58.6       | 48.4      | 5.1       | 0.105        | 43.3        |
| M0287  | 47.4     | 3.4      | 0.072       | 44         | 46.2      | 5.5       | 0.119        | 40.7        |
| M0292  | 46.6     | 3.7      | 0.079       | 42.9       | 42        | 6.2       | 0.148        | 35.8        |
| M0295  | 53.5     | 9.1      | 0.17        | 44.4       | 51        | 18.1      | 0.355        | 32.9        |
| M0296  | 56.7     | 3.2      | 0.056       | 53.5       | 58        | 7.2       | 0.124        | 50.8        |

| IBM ID | WT_CCM I | MT_CCM I | Ratio_CCM I | Diff_CCM I | WT_CCM II | MT_CCM II | Ratio_CCM II | Diff_CCM II |
|--------|----------|----------|-------------|------------|-----------|-----------|--------------|-------------|
| M0297  | 44.9     | 8.8      | 0.196       | 36.1       | 53.7      | 13.8      | 0.257        | 39.9        |
| M0298  | 50.3     | 8.4      | 0.167       | 41.9       | 48.5      | 22.4      | 0.462        | 26.1        |
| M0300  | 43.5     | 6        | 0.138       | 37.5       | 46.7      | 19.8      | 0.424        | 26.9        |
| M0301  | 45.6     | 8.4      | 0.184       | 37.2       | 45.4      | 17.2      | 0.379        | 28.2        |
| M0304  | 45.7     | 3.5      | 0.077       | 42.2       | 53.8      | 5.4       | 0.1          | 48.4        |
| M0305  | 43.3     | 6.9      | 0.159       | 36.4       | 42.3      | 17.7      | 0.418        | 24.6        |
| M0307  | 27.9     | 2.9      | 0.104       | 25         | 40.2      | 3.4       | 0.085        | 36.8        |
| M0311  | 37.9     | 8.1      | 0.214       | 29.8       | 52.3      | 18.6      | 0.356        | 33.7        |
| M0313  | 43.3     | 3.4      | 0.079       | 39.9       | 50.7      | 5.6       | 0.11         | 45.1        |
| M0314  | 39       | 9.5      | 0.244       | 29.5       | 42        | 18.4      | 0.438        | 23.6        |
| M0318  | 44.3     | 3.9      | 0.088       | 40.4       | 56.9      | 6.2       | 0.109        | 50.7        |
| M0321  | 59.3     | 3.4      | 0.057       | 55.9       | 55.1      | 4.6       | 0.083        | 50.5        |
| M0322  | 41.7     | 8.2      | 0.197       | 33.5       | 38.9      | 18.5      | 0.476        | 20.4        |
| M0325  | 44.8     | 7.2      | 0.161       | 37.6       | 58        | 19        | 0.328        | 39          |
| M0326  | 58.5     | 4.1      | 0.07        | 54.4       | 56.1      | 8.5       | 0.152        | 47.6        |
| M0328  | 45.4     | 3        | 0.066       | 42.4       | 48.7      | 4.5       | 0.092        | 44.2        |
| M0331  | 44.4     | 6.2      | 0.14        | 38.2       | 49.3      | 11.2      | 0.227        | 38.1        |
| M0334  | 50.7     | 8.8      | 0.174       | 41.9       | 60.3      | 18.5      | 0.307        | 41.8        |
| M0335  | 36.2     | 6.5      | 0.18        | 29.7       | 44.4      | 11.5      | 0.259        | 32.9        |
| M0337  | 46.7     | 10.7     | 0.229       | 36         | 48.4      | 25.2      | 0.521        | 23.2        |
| M0340  | 49       | 10       | 0.204       | 39         | 54.6      | 22.4      | 0.41         | 32.2        |
| M0341  | 45.3     | 3.2      | 0.071       | 42.1       | 48.6      | 4.1       | 0.084        | 44.5        |
| M0344  | 51.7     | 3.8      | 0.074       | 47.9       | 45.6      | 5.8       | 0.127        | 39.8        |
| M0345  | 42.7     | 9.3      | 0.218       | 33.4       | 49        | 16.2      | 0.331        | 32.8        |
| M0346  | 46.2     | 10.1     | 0.219       | 36.1       | 48.4      | 19.8      | 0.409        | 28.6        |
| M0347  | 53.5     | 4.2      | 0.079       | 49.3       | 60.1      | 8.8       | 0.146        | 51.3        |
| M0349  | 52.8     | 4.3      | 0.081       | 48.5       | 59.2      | 6.9       | 0.117        | 52.3        |
| M0351  | 34.4     | 7.3      | 0.212       | 27.1       | 59.8      | 25.5      | 0.426        | 34.3        |

| IBM ID | WT_CCM I | MT_CCM I | Ratio_CCM I | Diff_CCM I | WT_CCM II | MT_CCM II | Ratio_CCM II | Diff_CCM II |
|--------|----------|----------|-------------|------------|-----------|-----------|--------------|-------------|
| M0352  | 40.9     | 11.5     | 0.281       | 29.4       | 52.3      | 24.1      | 0.461        | 28.2        |
| M0353  | 52.9     | 10.1     | 0.191       | 42.8       | 60.1      | 23.4      | 0.389        | 36.7        |
| M0354  | 45.4     | 3.4      | 0.075       | 42         | 56.2      | 5.6       | 0.1          | 50.6        |
| M0355  | 48.4     | 9.5      | 0.196       | 38.9       | 58.5      | 20.1      | 0.344        | 38.4        |
| M0356  | 49.7     | 4.5      | 0.091       | 45.2       | 59.7      | 7         | 0.117        | 52.7        |
| M0357  | 53.4     | 10.6     | 0.199       | 42.8       | 46.2      | 18        | 0.39         | 28.2        |
| M0358  | 44.5     | 7.2      | 0.162       | 37.3       | 50.4      | 17.2      | 0.341        | 33.2        |
| M0360  | 39.1     | 11.4     | 0.292       | 27.7       | 52.3      | 18.9      | 0.361        | 33.4        |
| M0361  | 29.7     | 3.5      | 0.118       | 26.2       | 41.8      | 4.9       | 0.117        | 36.9        |
| M0362  | 36.8     | 8.9      | 0.242       | 27.9       | 56.4      | 15.1      | 0.268        | 41.3        |
| M0364  | 46.2     | 11.4     | 0.247       | 34.8       | 60.2      | 17.8      | 0.296        | 42.4        |
| M0368  | 51.1     | 6.9      | 0.135       | 44.2       | 55.3      | 19.8      | 0.358        | 35.5        |
| M0369  | 48.7     | 10.2     | 0.209       | 38.5       | 49.4      | 17.3      | 0.35         | 32.1        |
| M0372  | 44.3     | 3.7      | 0.084       | 40.6       | 42.7      | 6.3       | 0.148        | 36.4        |
| M0373  | 49.4     | 3.6      | 0.073       | 45.8       | 59.2      | 4.9       | 0.083        | 54.3        |
| M0378  | 53.4     | 7.4      | 0.139       | 46         | 64.5      | 16.2      | 0.251        | 48.3        |
| M0379  | 42.6     | 3        | 0.07        | 39.6       | 52.7      | 3.8       | 0.072        | 48.9        |
| M0380  | 49.7     | 12.2     | 0.245       | 37.5       | 70.3      | 30.4      | 0.432        | 39.9        |
| M0381  | 40       | 9.5      | 0.238       | 30.5       | 43.6      | 28.9      | 0.663        | 14.7        |
| M0382  | 48.7     | 8.6      | 0.177       | 40.1       | 57.2      | 20.6      | 0.36         | 36.6        |
| M0383  | 55.7     | 2.7      | 0.048       | 53         | 50.1      | 4.9       | 0.098        | 45.2        |
| M0384  | 27.3     | 2.5      | 0.092       | 24.8       | 46.8      | 4.2       | 0.09         | 42.6        |

Table S2. The trait mean values of the CCM traits for the wild-type (WT) and mutant (MT) siblings of F<sub>1</sub> hybrids of *OyI-N1989/oyI:B73* (pollen-parent) with respective Syn10 line.

| Syn10_ID | Liu et.al-ID | WT_CCM I | MT_CCM I | Ratio_CCM I | Diff_CCM I | WT_CCM II | MT_CCM II | Ratio_CCM II | Diff_CCM II |
|----------|--------------|----------|----------|-------------|------------|-----------|-----------|--------------|-------------|
| M0001    | IBM_1        | 61.60    | 2.48     | 0.04        | 59.12      | 88.70     | 6.48      | 0.07         | 82.22       |
| M0002    | IBM_2        | 63.63    | 6.95     | 0.11        | 56.68      | 63.52     | 31.85     | 0.50         | 31.67       |
| M0009    | IBM_5        | 43.13    | 7.93     | 0.19        | 35.20      | 77.85     | 28.33     | 0.38         | 49.52       |
| M0010    | IBM_6        | 62.70    | 3.02     | 0.05        | 59.68      | 78.75     | 8.97      | 0.11         | 69.78       |
| M0011    | IBM_7        | 41.67    | 6.12     | 0.15        | 35.55      | 70.70     | 25.72     | 0.37         | 44.98       |
| M0012    | IBM_8        | 51.43    | 7.13     | 0.14        | 44.30      | 67.83     | 30.13     | 0.45         | 37.70       |
| M0015    | IBM_9        | 43.57    | 6.50     | 0.15        | 37.07      | 64.53     | 25.20     | 0.39         | 39.33       |
| M0019    | IBM_11       | 53.63    | 1.87     | 0.04        | 51.77      | 77.97     | 5.27      | 0.07         | 72.70       |
| M0020    | IBM_12       | 56.82    | 2.03     | 0.04        | 54.78      | 73.58     | 6.05      | 0.08         | 67.53       |
| M0023    | IBM_13       | 55.87    | 7.20     | 0.13        | 48.67      | 75.42     | 27.42     | 0.36         | 48.00       |
| M0024    | IBM_14       | 47.42    | 8.05     | 0.17        | 39.37      | 63.79     | 29.90     | 0.47         | 33.89       |
| M0025    | IBM_15       | 51.28    | 9.50     | 0.19        | 41.78      | 69.18     | 25.88     | 0.37         | 43.30       |
| M0027    | IBM_16       | 42.02    | 2.10     | 0.05        | 39.92      | 70.55     | 6.00      | 0.09         | 64.55       |
| M0029    | IBM_17       | 55.58    | 6.52     | 0.12        | 49.07      | 63.40     | 25.62     | 0.40         | 37.78       |
| M0030    | IBM_18       | 54.60    | 5.95     | 0.11        | 48.65      | 69.72     | 22.88     | 0.33         | 46.83       |
| M0032    | IBM_19       | 54.28    | 7.90     | 0.15        | 46.38      | 68.08     | 33.97     | 0.51         | 34.12       |
| M0034    | IBM_20       | 58.70    | 6.80     | 0.12        | 51.90      | 78.75     | 33.10     | 0.42         | 45.65       |
| M0036    | IBM_21       | 56.42    | 2.27     | 0.04        | 54.15      | 89.33     | 8.30      | 0.09         | 81.03       |
| M0038    | IBM_22       | 51.83    | 10.80    | 0.23        | 41.03      | 64.40     | 34.07     | 0.53         | 30.33       |
| M0041    | IBM_23       | 50.20    | 4.72     | 0.10        | 45.48      | 57.35     | 25.40     | 0.44         | 31.95       |
| M0042    | IBM_24       | 47.48    | 6.48     | 0.14        | 41.00      | 73.33     | 34.02     | 0.47         | 39.32       |
| M0043    | IBM_25       | 46.65    | 7.57     | 0.16        | 39.08      | 67.40     | 30.68     | 0.46         | 36.72       |
| M0047    | IBM_26       | 53.45    | 2.75     | 0.05        | 50.70      | 59.08     | 6.85      | 0.12         | 52.23       |
| M0049    | IBM_27       | 41.42    | 2.40     | 0.06        | 39.02      | 72.32     | 7.62      | 0.11         | 64.70       |
| M0050    | IBM_28       | 56.25    | 8.95     | 0.16        | 47.30      | 75.12     | 33.12     | 0.44         | 42.00       |
| M0053    | IBM_30       | 47.47    | 7.65     | 0.16        | 39.82      | 76.62     | 30.73     | 0.40         | 45.88       |

| Syn10_ID | Liu et.al-ID | WT_CCM1 | MT_CCM1 | Ratio_CCM1 | Diff_CCM1 | WT_CCM2 | MT_CCM2 | Ratio_CCM2 | Diff_CCM2 |
|----------|--------------|---------|---------|------------|-----------|---------|---------|------------|-----------|
| M0054    | IBM_31       | 52.93   | 6.98    | 0.13       | 45.95     | 72.35   | 33.18   | 0.46       | 39.17     |
| M0055    | IBM_32       | 57.95   | 2.75    | 0.05       | 55.20     | 74.55   | 6.08    | 0.08       | 68.47     |
| M0056    | IBM_33       | 54.38   | 5.38    | 0.10       | 49.00     | 73.98   | 26.03   | 0.36       | 47.95     |
| M0057    | IBM_34       | 43.82   | 6.00    | 0.14       | 37.82     | 70.92   | 26.43   | 0.37       | 44.48     |
| M0061    | IBM_35       | 45.27   | 1.57    | 0.03       | 43.70     | 64.03   | 4.67    | 0.07       | 59.37     |
| M0062    | IBM_36       | 56.05   | 5.82    | 0.10       | 50.23     | 73.72   | 21.98   | 0.30       | 51.73     |
| M0068    | IBM_39       | 56.32   | 1.72    | 0.03       | 54.60     | 70.68   | 5.55    | 0.08       | 65.13     |
| M0069    | IBM_40       | 48.58   | 13.27   | 0.27       | 35.32     | 74.30   | 32.48   | 0.44       | 41.82     |
| M0070    | IBM_41       | 48.43   | 2.30    | 0.05       | 46.13     | 73.15   | 6.97    | 0.10       | 66.18     |
| M0074    | IBM_42       | 53.02   | 1.82    | 0.04       | 51.20     | 76.63   | 6.42    | 0.08       | 70.22     |
| M0076    | IBM_43       | 46.47   | 2.58    | 0.06       | 43.88     | 74.67   | 7.85    | 0.11       | 66.82     |
| M0078    | IBM_44       | 57.53   | 6.85    | 0.12       | 50.68     | 74.27   | 27.07   | 0.36       | 47.20     |
| M0084    | IBM_48       | 52.07   | 1.75    | 0.03       | 50.32     | 80.42   | 4.33    | 0.05       | 76.08     |
| M0090    | IBM_49       | 49.07   | 7.13    | 0.15       | 41.93     | 67.05   | 30.32   | 0.45       | 36.73     |
| M0091    | IBM_50       | 38.28   | 7.72    | 0.20       | 30.57     | 72.65   | 31.47   | 0.44       | 41.18     |
| M0092    | IBM_51       | 48.08   | 8.28    | 0.18       | 39.80     | 66.43   | 45.65   | 0.69       | 20.78     |
| M0093    | IBM_52       | 55.40   | 7.07    | 0.13       | 48.33     | 68.63   | 32.85   | 0.48       | 35.78     |
| M0095    | IBM_53       | 53.27   | 6.13    | 0.11       | 47.13     | 70.05   | 27.83   | 0.40       | 42.22     |
| M0105    | IBM_55       | 60.37   | 6.47    | 0.11       | 53.90     | 61.80   | 33.78   | 0.55       | 28.02     |
| M0108    | IBM_56       | 40.58   | 7.47    | 0.19       | 33.12     | 64.13   | 29.22   | 0.47       | 34.92     |
| M0109    | IBM_57       | 50.32   | 5.77    | 0.12       | 44.55     | 62.47   | 25.20   | 0.40       | 37.27     |
| M0111    | IBM_59       | 45.63   | 7.33    | 0.16       | 38.30     | 82.28   | 31.27   | 0.38       | 51.02     |
| M0116    | IBM_62       | 48.72   | 6.35    | 0.13       | 42.37     | 72.90   | 25.85   | 0.35       | 47.05     |
| M0118    | IBM_63       | 52.32   | 7.85    | 0.15       | 44.47     | 63.05   | 31.90   | 0.51       | 31.15     |
| M0119    | IBM_64       | 50.62   | 6.68    | 0.13       | 43.93     | 70.95   | 30.12   | 0.43       | 40.83     |
| M0120    | IBM_65       | 49.90   | 6.75    | 0.14       | 43.15     | 69.55   | 33.57   | 0.49       | 35.98     |
| M0126    | IBM_67       | 47.63   | 5.70    | 0.12       | 41.93     | 70.72   | 32.02   | 0.45       | 38.70     |
| M0130    | IBM_69       | 51.00   |         |            |           | 71.08   |         |            |           |



| Syn10_ID | Liu et.al-ID | WT_CCM1 | MT_CCM1 | Ratio_CCM1 | Diff_CCM1 | WT_CCM2 | MT_CCM2 | Ratio_CCM2 | Diff_CCM2 |
|----------|--------------|---------|---------|------------|-----------|---------|---------|------------|-----------|
| M0136    | IBM_70       | 49.98   | 6.73    | 0.14       | 43.25     | 74.30   | 28.55   | 0.38       | 45.75     |
| M0317    | IBM_151      | 52.90   | 8.10    | 0.16       | 44.80     | 79.77   | 28.58   | 0.36       | 51.18     |
| M0316    | IBM_150      | 47.23   | 5.35    | 0.11       | 41.88     | 71.78   | 25.22   | 0.35       | 46.57     |
| M0315    | IBM_149      | 60.88   | 1.65    | 0.03       | 59.23     | 65.95   | 5.67    | 0.09       | 60.28     |
| M0312    | IBM_147      | 48.80   | 7.48    | 0.15       | 41.32     | 70.07   | 23.83   | 0.34       | 46.23     |
| M0305    | IBM_144      | 50.60   | 1.68    | 0.03       | 48.92     | 76.28   | 5.60    | 0.07       | 70.68     |
| M0298    | IBM_142      | 44.60   | 6.25    | 0.14       | 38.35     | 70.28   | 28.63   | 0.41       | 41.65     |
| M0296    | IBM_141      | 47.62   | 7.18    | 0.15       | 40.43     | 69.92   | 25.70   | 0.37       | 44.22     |
| M0295    | IBM_140      | 57.23   | 9.92    | 0.17       | 47.32     | 75.47   | 31.70   | 0.42       | 43.77     |
| M0293    | IBM_139      | 50.68   | 2.38    | 0.05       | 48.30     | 69.17   | 7.75    | 0.11       | 61.42     |
| M0290    | IBM_138      | 46.50   | 8.70    | 0.19       | 37.80     | 64.85   | 28.65   | 0.44       | 36.20     |
| M0285    | IBM_136      | 47.28   | 5.52    | 0.12       | 41.77     | 70.60   | 26.97   | 0.38       | 43.63     |
| M0272    | IBM_134      | 53.27   | 6.82    | 0.13       | 46.45     | 63.68   | 29.03   | 0.45       | 34.65     |
| M0267    | IBM_133      | 45.87   | 8.60    | 0.19       | 37.27     | 71.52   | 31.93   | 0.44       | 39.58     |
| M0266    | IBM_132      | 55.32   | 2.10    | 0.04       | 53.22     | 73.52   | 4.48    | 0.06       | 69.03     |
| M0264    | IBM_131      | 56.15   | 6.17    | 0.11       | 49.98     | 75.85   | 29.72   | 0.40       | 46.13     |
| M0262    | IBM_130      | 47.27   | 6.37    | 0.13       | 40.90     | 69.78   | 35.73   | 0.52       | 34.05     |
| M0258    | IBM_127      | 47.32   | 6.10    | 0.13       | 41.22     | 63.32   | 22.58   | 0.36       | 40.73     |
| M0256    | IBM_126      | 44.07   | 5.60    | 0.13       | 38.47     | 68.58   | 23.98   | 0.35       | 44.60     |
| M0253    | IBM_125      | 48.80   | 6.07    | 0.12       | 42.73     | 71.77   | 21.50   | 0.30       | 50.27     |
| M0252    | IBM_124      | 36.88   | 6.03    | 0.16       | 30.85     | 70.33   | 33.90   | 0.48       | 36.43     |
| M0250    | IBM_123      | 51.53   | 2.27    | 0.04       | 49.27     | 75.92   | 6.67    | 0.09       | 69.25     |
| M0249    | IBM_122      | 44.30   | 1.87    | 0.04       | 42.43     | 60.27   | 4.72    | 0.08       | 55.55     |
| M0245    | IBM_121      | 51.08   | 8.55    | 0.17       | 42.53     | 70.38   | 32.10   | 0.46       | 38.28     |
| M0243    | IBM_119      | 44.28   | 7.90    | 0.18       | 36.38     | 73.25   | 33.73   | 0.46       | 39.52     |
| M0240    | IBM_117      | 36.15   | 2.02    | 0.06       | 34.13     | 76.32   | 6.57    | 0.09       | 69.75     |
| M0237    | IBM_115      | 44.67   | 6.83    | 0.16       | 37.83     | 67.78   | 28.33   | 0.42       | 39.45     |
| M0234    | IBM_114      | 48.87   | 8.12    | 0.17       | 40.75     | 75.62   | 24.95   | 0.33       | 50.67     |

| Syn10_ID | Liu et.al-ID | WT_CCM1 | MT_CCM1 | Ratio_CCM1 | Diff_CCM1 | WT_CCM2 | MT_CCM2 | Ratio_CCM2 | Diff_CCM2 |
|----------|--------------|---------|---------|------------|-----------|---------|---------|------------|-----------|
| M0231    | IBM_113      | 54.68   | 2.88    | 0.05       | 51.80     | 83.48   | 6.00    | 0.07       | 77.48     |
| M0230    | IBM_112      | 52.75   | 6.33    | 0.12       | 46.42     | 74.83   | 28.87   | 0.39       | 45.97     |
| M0227    | IBM_111      | 43.10   | 1.85    | 0.04       | 41.25     | 70.48   | 5.58    | 0.08       | 64.90     |
| M0223    | IBM_110      | 41.03   | 2.33    | 0.06       | 38.70     | 68.05   | 7.30    | 0.11       | 60.75     |
| M0221    | IBM_109      | 49.03   | 7.90    | 0.16       | 41.13     | 66.18   | 26.78   | 0.40       | 39.40     |
| M0218    | IBM_108      | 43.58   | 7.63    | 0.18       | 35.95     | 64.90   | 35.08   | 0.54       | 29.82     |
| M0217    | IBM_107      | 48.13   | 9.65    | 0.20       | 38.48     | 71.27   | 30.12   | 0.42       | 41.15     |
| M0215    | IBM_106      | 47.88   | 9.38    | 0.20       | 38.50     | 60.53   | 35.68   | 0.60       | 24.85     |
| M0212    | IBM_104      | 54.03   | 8.73    | 0.16       | 45.30     | 78.37   | 33.65   | 0.43       | 44.72     |
| M0210    | IBM_103      | 43.23   | 5.53    | 0.13       | 37.70     | 68.23   | 26.13   | 0.38       | 42.10     |
| M0209    | IBM_102      | 57.28   | 7.55    | 0.13       | 49.73     | 73.48   | 37.03   | 0.50       | 36.45     |
| M0208    | IBM_101      | 56.32   | 7.42    | 0.13       | 48.90     | 66.25   | 28.10   | 0.42       | 38.15     |
| M0206    | IBM_100      | 47.27   | 6.17    | 0.13       | 41.10     | 70.88   | 26.03   | 0.37       | 44.85     |
| M0202    | IBM_98       | 51.02   | 2.15    | 0.04       | 48.87     | 72.88   | 7.50    | 0.10       | 65.38     |
| M0198    | IBM_97       | 51.87   | 5.98    | 0.12       | 45.88     | 77.87   | 35.22   | 0.45       | 42.65     |
| M0196    | IBM_96       | 50.05   | 10.48   | 0.23       | 39.57     | 67.02   | 39.60   | 0.59       | 27.42     |
| M0195    | IBM_95       | 70.67   | 8.12    | 0.12       | 62.55     | 85.57   | 26.82   | 0.31       | 58.75     |
| M0193    | IBM_94       | 44.08   | 6.98    | 0.16       | 37.09     | 66.80   | 31.60   | 0.47       | 35.20     |
| M0189    | IBM_93       | 64.22   | 8.82    | 0.14       | 55.40     | 75.55   | 29.77   | 0.39       | 45.78     |
| M0188    | IBM_92       | 45.37   | 8.08    | 0.19       | 37.28     | 69.07   | 22.22   | 0.32       | 46.85     |
| M0184    | IBM_91       | 57.68   | 7.43    | 0.13       | 50.25     | 69.73   | 36.22   | 0.52       | 33.52     |
| M0179    | IBM_90       | 51.85   | 9.25    | 0.18       | 42.60     | 80.60   | 34.78   | 0.43       | 45.82     |
| M0178    | IBM_89       | 46.08   | 6.40    | 0.14       | 39.68     | 78.50   | 36.05   | 0.46       | 42.45     |
| M0175    | IBM_87       | 53.80   | 7.90    | 0.15       | 45.90     | 79.70   | 40.65   | 0.51       | 39.05     |
| M0173    | IBM_86       | 50.12   | 5.15    | 0.10       | 44.97     | 64.60   | 28.38   | 0.44       | 36.22     |
| M0172    | IBM_85       | 40.22   | 3.00    | 0.08       | 37.22     | 68.17   | 6.92    | 0.10       | 61.25     |
| M0171    | IBM_84       | 53.13   | 2.63    | 0.05       | 50.50     | 72.98   | 7.03    | 0.10       | 65.95     |
| M0169    | IBM_83       | 49.82   | 2.08    | 0.04       | 47.73     | 67.88   | 7.08    | 0.10       | 60.80     |

| Syn10_ID | Liu et.al-ID | WT_CCM1 | MT_CCM1 | Ratio_CCM1 | Diff_CCM1 | WT_CCM2 | MT_CCM2 | Ratio_CCM2 | Diff_CCM2 |
|----------|--------------|---------|---------|------------|-----------|---------|---------|------------|-----------|
| M0166    | IBM_81       | 53.28   | 5.27    | 0.10       | 48.02     | 82.12   | 24.98   | 0.30       | 57.13     |
| M0162    | IBM_79       | 46.07   | 8.60    | 0.19       | 37.47     | 57.95   | 26.57   | 0.46       | 31.38     |
| M0159    | IBM_78       | 41.42   | 2.03    | 0.05       | 39.38     | 67.48   | 5.05    | 0.07       | 62.43     |
| M0156    | IBM_76       | 35.48   | 2.27    | 0.06       | 33.22     | 59.70   | 7.23    | 0.12       | 52.48     |
| M0155    | IBM_75       | 52.38   | 6.88    | 0.13       | 45.50     | 71.03   | 34.25   | 0.49       | 36.78     |
| M0152    | IBM_74       | 39.67   | 2.00    | 0.05       | 37.67     | 69.10   | 4.42    | 0.06       | 64.68     |
| M0145    | IBM_72       | 52.87   | 2.17    | 0.04       | 50.70     | 67.30   | 7.12    | 0.11       | 60.18     |
| M0138    | IBM_71       | 60.95   | 8.98    | 0.15       | 51.97     | 72.48   | 37.67   | 0.52       | 34.82     |
| M0319    | IBM_152      | 47.40   | 7.65    | 0.16       | 39.75     | 71.78   | 31.78   | 0.45       | 40.00     |
| M0324    | IBM_154      | 44.90   | 7.67    | 0.18       | 37.23     | 76.93   | 30.53   | 0.40       | 46.40     |
| M0328    | IBM_155      | 40.57   | 2.50    | 0.06       | 38.07     | 68.15   | 6.97    | 0.10       | 61.18     |
| M0330    | IBM_156      | 51.43   | 2.80    | 0.06       | 48.63     | 66.87   | 9.32    | 0.14       | 57.55     |
| M0332    | IBM_157      | 55.77   | 7.72    | 0.14       | 48.05     | 74.23   | 34.78   | 0.47       | 39.45     |
| M0335    | IBM_158      | 45.13   | 6.30    | 0.14       | 38.83     | 66.22   | 29.42   | 0.44       | 36.80     |
| M0336    | IBM_159      | 54.95   | 5.62    | 0.10       | 49.33     | 66.20   | 24.33   | 0.36       | 41.87     |
| M0340    | IBM_160      | 50.07   | 6.42    | 0.13       | 43.65     | 70.92   | 32.45   | 0.46       | 38.47     |
| M0341    | IBM_161      | 45.77   | 5.88    | 0.13       | 39.88     | 66.17   | 29.02   | 0.44       | 37.15     |
| M0345    | IBM_163      | 39.53   | 2.00    | 0.05       | 37.53     | 66.82   | 5.43    | 0.08       | 61.38     |
| M0347    | IBM_165      | 47.03   | 6.58    | 0.14       | 40.45     | 78.90   | 26.65   | 0.34       | 52.25     |
| M0349    | IBM_166      | 48.20   | 7.65    | 0.16       | 40.55     | 80.10   | 33.42   | 0.42       | 46.68     |
| M0356    | IBM_167      | 51.57   | 1.57    | 0.03       | 50.00     | 75.72   | 5.28    | 0.07       | 70.43     |
| M0357    | IBM_168      | 44.47   | 5.68    | 0.13       | 38.78     | 69.68   | 23.17   | 0.33       | 46.52     |
| M0358    | IBM_169      | 67.85   | 5.88    | 0.09       | 61.97     | 82.13   | 34.42   | 0.42       | 47.72     |
| M0366    | IBM_170      | 55.93   | 2.47    | 0.04       | 53.47     | 73.63   | 6.35    | 0.09       | 67.28     |
| M0372    | IBM_171      | 51.37   | 9.13    | 0.18       | 42.23     | 77.35   | 34.88   | 0.45       | 42.47     |
| M0373    | IBM_172      | 37.92   | 1.78    | 0.05       | 36.13     | 72.35   | 4.80    | 0.07       | 67.55     |
| M0374    | IBM_173      | 41.17   | 1.80    | 0.05       | 39.37     | 66.05   | 5.58    | 0.09       | 60.47     |
| M0375    | IBM_174      | 46.17   | 6.23    | 0.14       | 39.93     | 67.58   | 29.42   | 0.44       | 38.16     |

| Syn10_ID | Liu et.al-ID | WT_CCM1 | MT_CCM1 | Ratio_CCM1 | Diff_CCM1 | WT_CCM2 | MT_CCM2 | Ratio_CCM2 | Diff_CCM2 |
|----------|--------------|---------|---------|------------|-----------|---------|---------|------------|-----------|
| M0376    | IBM_175      | 58.53   | 2.32    | 0.04       | 56.22     | 74.37   | 8.18    | 0.11       | 66.18     |
| M0381    | IBM_178      | 50.28   | 2.27    | 0.04       | 48.02     | 57.35   | 6.95    | 0.12       | 50.40     |
| M0382    | IBM_179      | 52.32   | 4.85    | 0.09       | 47.47     | 77.27   | 21.68   | 0.29       | 55.58     |
| M0385    | IBM_180      | 34.77   | 5.25    | 0.15       | 29.52     | 71.38   | 24.52   | 0.34       | 46.87     |
| M0388    | IBM_181      | 60.67   | 6.83    | 0.11       | 53.83     | 71.70   | 26.62   | 0.37       | 45.08     |
| M0389    | IBM_182      | 48.78   | 7.87    | 0.16       | 40.92     | 70.38   | 29.97   | 0.43       | 40.42     |
| M0390    | IBM_183      | 39.53   | 1.70    | 0.04       | 37.83     | 72.97   | 5.02    | 0.07       | 67.95     |
| M0391    | IBM_184      | 52.42   | 2.32    | 0.05       | 50.10     | 79.38   | 6.62    | 0.08       | 72.77     |
| M0396    | IBM_185      | 51.53   | 6.05    | 0.12       | 45.48     | 79.13   | 33.27   | 0.42       | 45.87     |
| M0401    | IBM_187      | 60.02   | 7.20    | 0.12       | 52.82     | 71.75   | 32.05   | 0.45       | 39.70     |
| M0404    | IBM_188      | 53.32   | 1.77    | 0.03       | 51.55     | 75.68   | 5.95    | 0.08       | 69.73     |
| M0405    | IBM_189      | 53.60   | 1.93    | 0.04       | 51.67     | 70.52   | 6.07    | 0.09       | 64.45     |
| M0407    | IBM_190      | 47.50   | 7.75    | 0.17       | 39.75     | 77.98   | 30.65   | 0.39       | 47.33     |
| M0412    | IBM_191      | 37.87   | 7.05    | 0.19       | 30.82     | 74.98   | 30.13   | 0.40       | 44.85     |
| M0414    | IBM_192      | 42.75   | 6.57    | 0.16       | 36.18     | 68.87   | 27.23   | 0.39       | 41.63     |
| M0422    | IBM_194      | 47.47   | 1.82    | 0.04       | 45.65     | 77.98   | 7.70    | 0.10       | 70.28     |
| M0424    | IBM_195      | 45.82   | 4.88    | 0.11       | 40.93     | 67.33   | 23.18   | 0.35       | 44.15     |
| M0427    | IBM_196      | 47.42   | 8.50    | 0.18       | 38.92     | 77.37   | 39.40   | 0.51       | 37.97     |
| M0428    | IBM_197      | 49.53   | 8.77    | 0.18       | 40.77     | 74.85   | 30.78   | 0.41       | 44.07     |
| M0429    | IBM_198      | 51.37   | 6.95    | 0.14       | 44.42     | 74.28   | 29.80   | 0.40       | 44.48     |
| M0430    | IBM_199      | 42.72   | 8.85    | 0.20       | 33.87     | 74.15   | 30.12   | 0.41       | 44.03     |
| M0431    | IBM_200      | 46.80   | 1.98    | 0.04       | 44.82     | 77.30   | 6.02    | 0.08       | 71.28     |
| M0433    | IBM_201      | 57.42   | 8.47    | 0.15       | 48.95     | 79.95   | 32.02   | 0.40       | 47.93     |
| M0434    | IBM_202      | 48.87   | 6.88    | 0.14       | 41.98     | 68.75   | 28.70   | 0.42       | 40.05     |
| M0436    | IBM_203      | 39.53   | 5.48    | 0.14       | 34.05     | 68.33   | 25.87   | 0.38       | 42.47     |
| M0438    | IBM_204      | 52.88   | 9.07    | 0.17       | 43.82     | 69.20   | 33.87   | 0.49       | 35.33     |
| M0443    | IBM_206      | 58.77   | 1.98    | 0.03       | 56.78     | 72.68   | 5.62    | 0.08       | 67.07     |
| M0444    | IBM_207      | 44.07   | 5.62    | 0.13       | 38.45     | 68.47   | 26.90   | 0.40       | 41.57     |

| Syn10_ID | Liu et.al-ID | WT_CCM1 | MT_CCM1 | Ratio_CCM1 | Diff_CCM1 | WT_CCM2 | MT_CCM2 | Ratio_CCM2 | Diff_CCM2 |
|----------|--------------|---------|---------|------------|-----------|---------|---------|------------|-----------|
| M0448    | IBM_209      | 59.33   | 8.03    | 0.14       | 51.30     | 67.35   | 26.55   | 0.39       | 40.80     |
| M0450    | IBM_211      | 47.35   | 1.60    | 0.03       | 45.75     | 71.05   | 5.78    | 0.08       | 65.27     |
| M0453    | IBM_212      | 55.88   | 7.80    | 0.14       | 48.08     | 70.57   | 32.80   | 0.46       | 37.77     |
| M0454    | IBM_213      | 50.42   | 6.72    | 0.13       | 43.70     | 79.88   | 28.43   | 0.36       | 51.45     |
| M0457    | IBM_214      | 53.98   | 1.77    | 0.03       | 52.22     | 73.25   | 5.48    | 0.07       | 67.77     |
| M0461    | IBM_215      | 43.08   | 6.00    | 0.14       | 37.08     | 61.73   | 31.33   | 0.51       | 30.40     |
| M0463    | IBM_216      | 63.50   | 8.72    | 0.14       | 54.78     | 75.70   | 43.48   | 0.57       | 32.22     |
| M0465    | IBM_217      | 56.58   | 2.38    | 0.04       | 54.20     | 71.60   | 7.30    | 0.10       | 64.30     |
| M0466    | IBM_218      | 49.73   | 7.50    | 0.15       | 42.23     | 74.17   | 35.80   | 0.49       | 38.37     |
| M0469    | IBM_219      | 55.50   | 7.00    | 0.13       | 48.50     | 76.85   | 38.10   | 0.50       | 38.75     |
| M0471    | IBM_220      | 48.37   | 1.82    | 0.04       | 46.55     | 68.92   | 4.25    | 0.06       | 64.67     |
| M0472    | IBM_221      | 58.10   | 7.40    | 0.13       | 50.70     | 86.20   | 29.22   | 0.34       | 56.98     |
| M0474    | IBM_222      | 52.17   | 7.60    | 0.15       | 44.57     | 80.38   | 32.75   | 0.42       | 47.63     |
| M0476    | IBM_223      | 50.08   | 2.15    | 0.04       | 47.93     | 73.85   | 7.72    | 0.10       | 66.13     |
| M0477    | IBM_224      | 44.30   | 1.88    | 0.04       | 42.42     | 74.03   | 6.10    | 0.08       | 67.93     |
| M0479    | IBM_225      | 46.82   | 2.08    | 0.04       | 44.73     | 67.73   | 6.63    | 0.10       | 61.10     |
| M0481    | IBM_226      | 57.62   | 6.23    | 0.11       | 51.38     | 78.85   | 34.83   | 0.46       | 44.02     |
| M0487    | IBM_229      | 58.18   | 9.67    | 0.17       | 48.52     | 70.98   | 34.77   | 0.49       | 36.22     |
| M0489    | IBM_231      | 51.77   | 2.52    | 0.05       | 49.25     | 79.43   | 7.58    | 0.10       | 71.85     |
| M0491    | IBM_233      | 50.05   | 5.70    | 0.11       | 44.35     | 77.30   | 27.10   | 0.37       | 50.20     |
| M0492    | IBM_234      | 59.90   | 6.88    | 0.11       | 53.02     | 78.62   | 24.15   | 0.30       | 54.47     |
| M0494    | IBM_236      | 54.70   | 7.95    | 0.15       | 46.75     | 66.37   | 26.23   | 0.40       | 40.13     |
| M0630    | IBM_321      | 46.58   | 2.05    | 0.04       | 44.53     | 63.67   | 6.13    | 0.10       | 57.53     |
| M0624    | IBM_318      | 52.67   | 7.05    | 0.15       | 45.62     | 73.20   | 37.15   | 0.51       | 36.05     |
| M0623    | IBM_317      | 49.22   | 6.38    | 0.13       | 42.83     | 72.95   | 22.20   | 0.30       | 50.75     |
| M0619    | IBM_316      | 55.02   | 2.72    | 0.05       | 52.30     | 67.22   | 7.10    | 0.11       | 60.12     |
| M0618    | IBM_315      | 49.95   | 5.50    | 0.11       | 44.45     | 73.27   | 24.63   | 0.33       | 48.63     |
| M0617    | IBM_314      | 51.43   | 8.30    | 0.16       | 43.13     | 76.12   | 37.12   | 0.49       | 39.00     |

| Syn10_ID | Liu et.al-ID | WT_CCM1 | MT_CCM1 | Ratio_CCM1 | Diff_CCM1 | WT_CCM2 | MT_CCM2 | Ratio_CCM2 | Diff_CCM2 |
|----------|--------------|---------|---------|------------|-----------|---------|---------|------------|-----------|
| M0614    | IBM_313      | 53.55   | 7.52    | 0.14       | 46.03     | 78.38   | 30.65   | 0.39       | 47.73     |
| M0613    | IBM_312      | 43.05   | 5.87    | 0.14       | 37.18     | 72.65   | 28.18   | 0.39       | 44.47     |
| M0611    | IBM_311      | 52.82   | 7.92    | 0.15       | 44.90     | 67.73   | 23.88   | 0.35       | 43.85     |
| M0609    | IBM_310      | 49.28   | 1.78    | 0.04       | 47.50     | 76.05   | 5.13    | 0.07       | 70.92     |
| M0597    | IBM_306      | 59.10   | 7.60    | 0.13       | 51.50     | 72.33   | 39.93   | 0.56       | 32.40     |
| M0594    | IBM_305      | 50.00   | 9.05    | 0.18       | 40.95     | 74.63   | 35.20   | 0.47       | 39.43     |
| M0590    | IBM_304      | 53.37   | 8.20    | 0.15       | 45.17     | 73.02   | 25.10   | 0.34       | 47.92     |
| M0589    | IBM_303      | 64.10   | 6.27    | 0.10       | 57.83     | 83.17   | 35.68   | 0.43       | 47.48     |
| M0588    | IBM_302      | 49.58   | 2.07    | 0.04       | 47.52     | 74.22   | 5.52    | 0.07       | 68.70     |
| M0587    | IBM_301      | 43.30   | 1.85    | 0.04       | 41.45     | 71.37   | 4.98    | 0.07       | 66.38     |
| M0583    | IBM_298      | 48.10   | 7.30    | 0.15       | 40.80     | 67.75   | 30.25   | 0.45       | 37.50     |
| M0581    | IBM_297      | 55.30   | 6.40    | 0.12       | 48.90     | 66.83   | 23.52   | 0.35       | 43.32     |
| M0580    | IBM_296      | 60.83   | 7.73    | 0.13       | 53.10     | 82.37   | 29.42   | 0.36       | 52.95     |
| M0577    | IBM_295      | 47.55   | 6.43    | 0.13       | 41.12     | 72.72   | 29.13   | 0.41       | 43.58     |
| M0566    | IBM_285      | 39.68   | 5.47    | 0.14       | 34.22     | 68.43   | 30.62   | 0.45       | 37.82     |
| M0565    | IBM_284      | 51.77   | 7.87    | 0.15       | 43.90     | 74.60   | 27.38   | 0.37       | 47.22     |
| M0564    | IBM_283      | 48.85   | 8.68    | 0.18       | 40.17     | 70.23   | 28.65   | 0.41       | 41.58     |
| M0563    | IBM_282      | 47.48   | 2.15    | 0.05       | 45.33     | 61.13   | 6.87    | 0.11       | 54.27     |
| M0562    | IBM_281      | 53.05   | 2.32    | 0.04       | 50.73     | 81.25   | 6.98    | 0.09       | 74.27     |
| M0575    | IBM_294      | 50.62   | 1.97    | 0.04       | 48.65     | 73.17   | 7.50    | 0.10       | 65.67     |
| M0574    | IBM_293      | 63.78   | 7.15    | 0.11       | 56.63     | 64.95   | 33.68   | 0.52       | 31.27     |
| M0573    | IBM_292      | 47.10   | 4.35    | 0.09       | 42.75     | 61.40   | 31.70   | 0.52       | 29.70     |
| M0571    | IBM_290      | 62.95   | 2.28    | 0.04       | 60.67     | 78.53   | 7.73    | 0.10       | 70.80     |
| M0561    | IBM_280      | 46.85   | 7.95    | 0.18       | 38.90     | 67.33   | 25.65   | 0.39       | 41.68     |
| M0560    | IBM_279      | 53.15   | 8.60    | 0.17       | 44.55     | 75.43   | 26.17   | 0.35       | 49.27     |
| M0559    | IBM_278      | 53.45   | 7.05    | 0.13       | 46.40     | 70.15   | 29.92   | 0.43       | 40.23     |
| M0558    | IBM_277      | 47.20   | 1.73    | 0.04       | 45.47     | 76.55   | 5.62    | 0.07       | 70.93     |
| M0557    | IBM_276      | 43.90   | 5.43    | 0.12       | 38.47     | 73.72   | 23.43   | 0.32       | 50.28     |

| Syn10_ID | Liu et.al-ID | WT_CCM1 | MT_CCM1 | Ratio_CCM1 | Diff_CCM1 | WT_CCM2 | MT_CCM2 | Ratio_CCM2 | Diff_CCM2 |
|----------|--------------|---------|---------|------------|-----------|---------|---------|------------|-----------|
| M0556    | IBM_275      | 52.18   | 2.37    | 0.05       | 49.82     | 75.47   | 6.35    | 0.08       | 69.12     |
| M0553    | IBM_274      | 55.60   | 6.78    | 0.12       | 48.82     | 67.70   | 28.51   | 0.42       | 39.19     |
| M0551    | IBM_272      | 48.08   | 1.97    | 0.04       | 46.12     | 69.63   | 5.35    | 0.08       | 64.28     |
| M0550    | IBM_271      | 56.22   | 7.97    | 0.14       | 48.25     | 63.90   | 27.78   | 0.43       | 36.12     |
| M0549    | IBM_270      | 52.95   | 6.65    | 0.13       | 46.30     | 69.82   | 34.95   | 0.50       | 34.87     |
| M0548    | IBM_269      | 45.02   | 1.85    | 0.04       | 43.17     | 66.40   | 6.27    | 0.09       | 60.13     |
| M0546    | IBM_267      | 51.12   | 7.28    | 0.15       | 43.83     | 71.68   | 29.15   | 0.41       | 42.53     |
| M0545    | IBM_266      | 56.37   | 5.18    | 0.10       | 51.18     | 71.33   | 27.17   | 0.38       | 44.17     |
| M0543    | IBM_264      | 33.47   | 5.27    | 0.16       | 28.20     | 69.93   | 24.73   | 0.35       | 45.20     |
| M0544    | IBM_265      | 50.23   | 1.90    | 0.04       | 48.33     | 71.18   | 5.58    | 0.08       | 65.60     |
| M0540    | IBM_261      | 51.05   | 7.93    | 0.16       | 43.12     | 68.37   | 36.37   | 0.54       | 32.00     |
| M0538    | IBM_260      | 51.43   | 5.37    | 0.11       | 46.07     | 74.03   | 28.32   | 0.38       | 45.72     |
| M0537    | IBM_259      | 47.58   | 7.05    | 0.15       | 40.53     | 77.18   | 25.87   | 0.34       | 51.32     |
| M0535    | IBM_257      | 43.63   | 8.45    | 0.20       | 35.18     | 75.20   | 35.52   | 0.47       | 39.68     |
| M0534    | IBM_256      | 39.33   | 7.48    | 0.19       | 31.85     | 73.89   | 32.98   | 0.45       | 40.91     |
| M0533    | IBM_255      | 50.97   | 6.48    | 0.13       | 44.48     | 76.43   | 23.78   | 0.31       | 52.65     |
| M0532    | IBM_254      | 47.42   | 5.43    | 0.12       | 41.98     | 68.35   | 25.87   | 0.38       | 42.48     |
| M0527    | IBM_253      | 53.48   | 6.47    | 0.12       | 47.02     | 70.17   | 27.63   | 0.39       | 42.53     |
| M0525    | IBM_252      | 45.15   | 6.68    | 0.15       | 38.47     | 64.40   | 28.92   | 0.45       | 35.48     |
| M0519    | IBM_251      | 48.28   | 7.33    | 0.15       | 40.95     | 68.20   | 25.50   | 0.37       | 42.70     |
| M0517    | IBM_250      | 40.85   | 5.85    | 0.14       | 35.00     | 70.12   | 25.77   | 0.37       | 44.35     |
| M0513    | IBM_249      | 45.65   | 6.35    | 0.14       | 39.30     | 73.33   | 31.82   | 0.44       | 41.52     |
| M0512    | IBM_248      | 50.07   | 6.50    | 0.13       | 43.57     | 87.50   | 22.70   | 0.26       | 64.80     |
| M0510    | IBM_247      | 45.90   | 7.77    | 0.17       | 38.13     | 75.77   | 24.77   | 0.33       | 51.00     |
| M0509    | IBM_246      | 56.47   | 1.92    | 0.03       | 54.55     | 76.90   | 6.35    | 0.08       | 70.55     |
| M0506    | IBM_244      | 53.73   | 2.00    | 0.04       | 51.73     | 68.63   | 6.23    | 0.09       | 62.40     |
| M0502    | IBM_241      | 43.95   | 5.27    | 0.12       | 38.68     | 67.95   | 24.40   | 0.36       | 43.55     |
| M0500    | IBM_239      | 42.13   | 7.27    | 0.18       | 34.87     | 76.82   | 28.00   | 0.37       | 48.82     |



---

| Syn10_ID | Liu et.al-ID | WT_CCM1 | MT_CCM1 | Ratio_CCM1 | Diff_CCM1 | WT_CCM2 | MT_CCM2 | Ratio_CCM2 | Diff_CCM2 |
|----------|--------------|---------|---------|------------|-----------|---------|---------|------------|-----------|
| M0498    | IBM_237      | 44.35   | 1.82    | 0.04       | 42.53     | 71.73   | 4.98    | 0.07       | 66.75     |

---

Table S3. The average values of the CCM traits in wild-type (WT) and mutant (MT) siblings of the F<sub>1</sub> hybrids between *OyI-N1989/oyI*:B73 (as a pollen-parent) with respective BM-NILs. Data is derived from the field-grown plants with five replications planted in a RCBD. Parental (B73 and Mo17) F<sub>1</sub> crosses were planted as checks in each replication. Multiple plants (2-3) were measured for each genotype (wild-type or mutant) in each replication.

| Ear-parent  | NIL background | <i>veyI</i> status | MT_CCMI     | WT_CCMI      | Ratio_CCMI  | MT_CCMII     | WT_CCMII     | Ratio_CCMII |
|-------------|----------------|--------------------|-------------|--------------|-------------|--------------|--------------|-------------|
| <b>B73</b>  | .              | <b>B73</b>         | <b>4.75</b> | <b>27.49</b> | <b>0.17</b> | <b>22.15</b> | <b>64.55</b> | <b>0.34</b> |
| <b>Mo17</b> | .              | <b>Mo17</b>        | <b>2.05</b> | <b>31.17</b> | <b>0.07</b> | <b>5.69</b>  | <b>78.18</b> | <b>0.07</b> |
| b142        | B73            | B73                | 6.07        | 30.21        | 0.20        | 25.26        | 63.34        | 0.40        |
| b139        | B73            | B73                | 6.26        | 34.61        | 0.18        | 25.25        | 67.75        | 0.37        |
| b135        | B73            | B73                | 5.73        | 30.79        | 0.19        | 27.88        | 70.03        | 0.40        |
| b132        | B73            | B73                | 4.95        | 31.06        | 0.17        | 24.91        | 63.42        | 0.40        |
| b125        | B73            | B73                | 7.17        | 37.01        | 0.19        | 27.15        | 65.83        | 0.41        |
| b185        | B73            | B73                | 5.89        | 33.60        | 0.18        | 26.88        | 66.63        | 0.41        |
| b155        | B73            | B73                | 6.17        | 30.34        | 0.21        | 25.64        | 58.59        | 0.45        |
| b121        | B73            | B73                | 5.51        | 32.37        | 0.18        | 27.26        | 70.14        | 0.39        |
| b120        | B73            | B73                | 6.75        | 34.16        | 0.20        | 30.36        | 65.58        | 0.48        |
| b092        | B73            | B73                | 5.03        | 30.71        | 0.17        | 24.97        | 63.72        | 0.40        |
| b087        | B73            | B73                | 5.03        | 28.70        | 0.18        | 24.13        | 66.23        | 0.37        |
| b055        | B73            | B73                | 6.79        | 29.30        | 0.24        | 29.99        | 65.63        | 0.46        |
| b035        | B73            | B73                | 5.55        | 34.25        | 0.17        | 26.87        | 71.57        | 0.38        |
| b030        | B73            | B73                | 6.15        | 32.85        | 0.19        | 32.26        | 73.97        | 0.44        |
| b123        | B73            | Mo17               | 2.18        | 31.38        | 0.07        | 5.63         | 71.50        | 0.08        |
| b189        | B73            | Mo17               | 2.67        | 29.97        | 0.09        | 6.01         | 68.55        | 0.09        |
| b182        | B73            | Mo17               | 2.24        | 28.76        | 0.08        | 5.39         | 63.71        | 0.09        |
| b107        | B73            | Mo17               | 1.97        | 33.01        | 0.06        | 5.91         | 75.01        | 0.08        |
| b094        | B73            | Mo17               | 1.71        | 32.26        | 0.05        | 5.34         | 73.49        | 0.07        |
| b049        | B73            | Mo17               | 2.32        | 30.75        | 0.08        | 6.41         | 68.29        | 0.09        |
| b047        | B73            | Mo17               | 1.85        | 31.44        | 0.06        | 6.29         | 71.44        | 0.09        |
| b001        | B73            | Mo17               | 2.03        | 33.29        | 0.06        | 5.32         | 71.58        | 0.07        |

| Ear-parent | NIL background | <i>vey1</i> status | MT_CCMI | WT_CCMI | Ratio_CCMI | MT_CCMII | WT_CCMII | Ratio_CCMII |
|------------|----------------|--------------------|---------|---------|------------|----------|----------|-------------|
| mo24       | Mo17           | B73                | 5.73    | 29.76   | 0.20       | 30.65    | 68.89    | 0.45        |
| m097       | Mo17           | B73                | 5.53    | 35.29   | 0.16       | 29.03    | 72.02    | 0.41        |
| mo27       | Mo17           | Mo17               | 2.31    | 28.50   | 0.08       | 7.04     | 71.96    | 0.10        |
| m022       | Mo17           | Mo17               | 2.13    | 30.65   | 0.07       | 6.57     | 71.69    | 0.09        |
| m008       | Mo17           | Mo17               | 2.37    | 29.75   | 0.08       | 7.20     | 76.88    | 0.09        |
| m002       | Mo17           | Mo17               | 2.39    | 31.98   | 0.08       | 6.49     | 66.28    | 0.10        |
| m093       | Mo17           | Mo17               | 1.91    | 30.85   | 0.06       | 7.26     | 68.09    | 0.11        |
| m079       | Mo17           | Mo17               | 2.31    | 29.71   | 0.08       | 8.50     | 68.21    | 0.13        |
| m051       | Mo17           | Mo17               | 2.23    | 30.47   | 0.07       | 6.04     | 69.15    | 0.09        |
| m048       | Mo17           | Mo17               | 2.53    | 34.06   | 0.08       | 7.22     | 74.83    | 0.10        |
| m043       | Mo17           | Mo17               | 1.85    | 26.98   | 0.07       | 6.76     | 81.51    | 0.08        |
| m038       | Mo17           | Mo17               | 2.25    | 29.24   | 0.08       | 6.98     | 75.18    | 0.09        |
| m035       | Mo17           | Mo17               | 2.03    | 31.19   | 0.07       | 7.15     | 73.66    | 0.10        |

Table S4. The BLUP values of the wild-type (WT) and mutant (MT) siblings of the F<sub>1</sub> hybrids of *Oy1-N1989/oy1*:B73 with respective maize diversity lines (MDL). Information on the inbred lines from maize association panel (referred to as 302) was adapted from Flint-Garcia *et al.* 2005.

| Inbred  | State/Country       | Panel Type | Pedigree                              | WT_CCMI | MT_CCMI | Ratio_CCMI | Diff_CCMI | WT_CCMII | MT_CCMII | Ratio_CCMII | Diff_CCMII |
|---------|---------------------|------------|---------------------------------------|---------|---------|------------|-----------|----------|----------|-------------|------------|
| F10     | Puy-de-Dome, France | Ames       | Etoile de Normandie variety           | 54.91   | 10.67   | 0.21       | 44.34     | 76.84    | 32.81    | 0.37        | 49.65      |
| F431    | .                   | Ames       | .                                     | 66.77   | 9.09    | 0.12       | 57.56     | 78.97    | 38.01    | 0.46        | 44.49      |
| GE440   | North Carolina      | Ames       | Hastings Prolific                     | 60.34   | 9.42    | 0.16       | 51.15     | 68.42    | 22.56    | 0.34        | 44.04      |
| Hi33    | Hawaii              | Ames       | (M14 x C1187-2)O45)BC1                | 62.22   | 8.56    | 0.14       | 53.79     | 68.15    | 28.31    | 0.43        | 38.44      |
| HY2     | .                   | Ames       | .                                     | 57.83   | 2.74    | 0.05       | 52.95     | 67.11    | 9.63     | 0.15        | 54.00      |
| IA5125B | Iowa                | Ames       | Unknown                               | 54.52   | 5.67    | 0.11       | 47.32     | 71.69    | 14.98    | 0.21        | 55.44      |
| LH1     | USA                 | Ames       | <a href="#">Check PVP certificate</a> | 66.76   | 7.96    | 0.11       | 59.17     | 78.59    | 21.81    | 0.27        | 58.71      |
| LH119   | USA                 | Ames       | <a href="#">Check PVP certificate</a> | 58.75   | 8.70    | 0.15       | 49.89     | 69.25    | 29.71    | 0.44        | 38.67      |
| LH123HT | USA                 | Ames       | <a href="#">Check PVP certificate</a> | 59.51   | 11.22   | 0.19       | 49.01     | 73.16    | 30.15    | 0.41        | 43.64      |
| LH127   | USA                 | Ames       | <a href="#">Check PVP certificate</a> | 65.34   | 11.91   | 0.17       | 54.93     | 68.43    | 24.35    | 0.37        | 42.41      |
| LH128   | USA                 | Ames       | <a href="#">Check PVP certificate</a> | 58.63   | 10.02   | 0.17       | 48.86     | 72.83    | 44.43    | 0.60        | 30.21      |
| LH132   | USA                 | Ames       | <a href="#">Check PVP certificate</a> | 56.58   | 9.53    | 0.18       | 46.94     | 70.95    | 37.39    | 0.54        | 34.02      |
| LH145   | USA                 | Ames       | <a href="#">Check PVP certificate</a> | 55.76   | 8.90    | 0.17       | 46.48     | 72.41    | 21.03    | 0.29        | 50.92      |
| LH146Ht | USA                 | Ames       | <a href="#">Check PVP certificate</a> | 54.14   | 7.62    | 0.15       | 46.22     | 67.33    | 22.08    | 0.33        | 44.86      |
| LH149   | USA                 | Ames       | <a href="#">Check PVP certificate</a> | 60.00   | 7.94    | 0.14       | 51.78     | 71.48    | 26.35    | 0.37        | 44.79      |
| LH150   | USA                 | Ames       | <a href="#">Check PVP certificate</a> | 66.99   | 7.06    | 0.10       | 60.05     | 75.47    | 17.30    | 0.23        | 58.52      |
| LH160   | USA                 | Ames       | <a href="#">Check PVP certificate</a> | 61.48   | 8.89    | 0.15       | 52.75     | 78.30    | 29.55    | 0.36        | 51.27      |
| LH193   | USA                 | Ames       | <a href="#">Check PVP certificate</a> | 61.83   | 9.03    | 0.14       | 53.04     | 64.83    | 29.83    | 0.51        | 32.48      |
| LH194   | USA                 | Ames       | <a href="#">Check PVP certificate</a> | 60.00   | 8.04    | 0.14       | 51.71     | 74.28    | 22.98    | 0.31        | 51.71      |
| LH195   | USA                 | Ames       | <a href="#">Check PVP certificate</a> | 63.47   | 10.07   | 0.15       | 54.12     | 71.50    | 40.72    | 0.57        | 31.75      |
| LH196   | USA                 | Ames       | <a href="#">Check PVP certificate</a> | 53.16   | 6.81    | 0.14       | 45.06     | 70.76    | 32.44    | 0.46        | 38.26      |
| LH202   | USA                 | Ames       | <a href="#">Check PVP certificate</a> | 56.62   | 5.03    | 0.09       | 50.06     | 66.06    | 25.99    | 0.41        | 37.67      |
| LH205   | USA                 | Ames       | <a href="#">Check PVP certificate</a> | 55.33   | .       | .          | .         | 69.58    | .        | .           | .          |
| LH208   | USA                 | Ames       | <a href="#">Check PVP certificate</a> | 61.71   | 10.84   | 0.17       | 51.68     | 76.11    | 24.58    | 0.32        | 52.78      |
| LH220Ht | USA                 | Ames       | <a href="#">Check PVP certificate</a> | 56.60   | 5.98    | 0.10       | 53.00     | 71.61    | 23.18    | 0.34        | 45.29      |

| Inbred | State/Country | Panel Type | Pedigree                              | WT_CCMI | MT_CCMI | Ratio_CCMI | Diff_CCMI | WT_CCMII | MT_CCMII | Ratio_CCMII | Diff_CCMII |
|--------|---------------|------------|---------------------------------------|---------|---------|------------|-----------|----------|----------|-------------|------------|
| LH38   | USA           | Ames       | <a href="#">Check PVP certificate</a> | 65.04   | .       | .          | .         | 69.64    | .        | .           | .          |
| LH39   | USA           | Ames       | <a href="#">Check PVP certificate</a> | 54.78   | 6.99    | 0.14       | 46.71     | 62.94    | 16.94    | 0.29        | 41.60      |
| LH51   | USA           | Ames       | <a href="#">Check PVP certificate</a> | 64.66   | 2.98    | 0.05       | 60.28     | 73.93    | 13.26    | 0.18        | 60.08      |
| LH52   | USA           | Ames       | <a href="#">Check PVP certificate</a> | 56.92   | 2.56    | 0.05       | 52.07     | 70.89    | 9.10     | 0.13        | 59.68      |
| LH54   | USA           | Ames       | <a href="#">Check PVP certificate</a> | 49.70   | 3.10    | 0.07       | 43.80     | 75.02    | 10.90    | 0.15        | 63.73      |
| LH57   | USA           | Ames       | <a href="#">Check PVP certificate</a> | 58.93   | 3.17    | 0.06       | 53.86     | 75.36    | 10.82    | 0.15        | 64.27      |
| LH59   | USA           | Ames       | <a href="#">Check PVP certificate</a> | 60.65   | 3.68    | 0.06       | 53.68     | 69.38    | 13.59    | 0.21        | 52.55      |
| LH61   | USA           | Ames       | <a href="#">Check PVP certificate</a> | 59.40   | 2.53    | 0.05       | 54.82     | 77.87    | 10.60    | 0.14        | 67.91      |
| LH65   | USA           | Ames       | <a href="#">Check PVP certificate</a> | 64.17   | 2.56    | 0.04       | 60.03     | 75.25    | 11.05    | 0.15        | 63.91      |
| LH74   | USA           | Ames       | <a href="#">Check PVP certificate</a> | 56.16   | 6.97    | 0.13       | 48.24     | 70.42    | 32.74    | 0.47        | 37.52      |
| LH82   | USA           | Ames       | <a href="#">Check PVP certificate</a> | 53.95   | 8.39    | 0.17       | 44.83     | 69.38    | 26.02    | 0.38        | 42.21      |
| LH85   | USA           | Ames       | <a href="#">Check PVP certificate</a> | 61.12   | 7.77    | 0.13       | 53.12     | 76.72    | 18.38    | 0.24        | 59.26      |
| Mo16W  | Missouri      | Ames       | Pipe Corn                             | 58.03   | 13.77   | 0.24       | 45.64     | 71.67    | 46.03    | 0.64        | 27.15      |
| Mo20W  | Missouri      | Ames       | N6/Mo22                               | 68.39   | 8.23    | 0.12       | 60.79     | 70.64    | 24.42    | 0.35        | 45.40      |
| Mo48   | Missouri      | Ames       | (NC33/B52) S6                         | 56.85   | 12.54   | 0.24       | 45.19     | 74.12    | 41.86    | 0.56        | 34.32      |
| PH9    | .             | Ames       | .                                     | 58.96   | 7.83    | 0.13       | 50.72     | 67.32    | 19.26    | 0.30        | 45.52      |
| PHG29  | USA           | Ames       | <a href="#">Check PVP certificate</a> | 59.27   | 8.80    | 0.15       | 50.39     | 77.11    | 26.16    | 0.33        | 52.71      |
| PHG35  | USA           | Ames       | <a href="#">Check PVP certificate</a> | 61.89   | 7.96    | 0.13       | 53.84     | 75.05    | 22.92    | 0.30        | 52.84      |
| PHG39  | USA           | Ames       | <a href="#">Check PVP certificate</a> | 59.66   | 11.79   | 0.20       | 48.78     | 73.06    | 39.07    | 0.53        | 35.39      |
| PHG47  | USA           | Ames       | <a href="#">Check PVP certificate</a> | 61.17   | 8.55    | 0.14       | 52.65     | 72.70    | 25.62    | 0.35        | 47.14      |
| PHG50  | USA           | Ames       | <a href="#">Check PVP certificate</a> | 56.31   | 8.83    | 0.16       | 47.13     | 72.97    | 32.05    | 0.44        | 41.66      |
| PHG71  | USA           | Ames       | <a href="#">Check PVP certificate</a> | 59.68   | 11.54   | 0.20       | 48.97     | 72.62    | 25.19    | 0.35        | 47.42      |
| PHG72  | USA           | Ames       | <a href="#">Check PVP certificate</a> | 63.76   | 10.24   | 0.15       | 54.33     | 73.25    | 28.22    | 0.39        | 45.52      |
| PHG83  | USA           | Ames       | <a href="#">Check PVP certificate</a> | 61.61   | 2.77    | 0.05       | 57.07     | 72.02    | 10.75    | 0.16        | 59.73      |
| PHG86  | USA           | Ames       | <a href="#">Check PVP certificate</a> | 59.73   | 5.70    | 0.10       | 53.01     | 68.41    | 15.39    | 0.23        | 50.53      |
| PHH93  | USA           | Ames       | <a href="#">Check PVP certificate</a> | 61.40   | 10.16   | 0.16       | 51.81     | 70.23    | 29.12    | 0.42        | 40.54      |
| PHJ31  | USA           | Ames       | <a href="#">Check PVP certificate</a> | 64.20   | 21.74   | 0.33       | 46.96     | 74.87    | 43.57    | 0.57        | 33.79      |
| PHJ33  | USA           | Ames       | <a href="#">Check PVP certificate</a> | 59.09   | 2.49    | 0.04       | 54.50     | 73.34    | 9.10     | 0.13        | 63.05      |

| Inbred | State/Country | Panel Type | Pedigree                              | WT_CCMI | MT_CCMI | Ratio_CCMI | Diff_CCMI | WT_CCMII | MT_CCMII | Ratio_CCMII | Diff_CCMII |
|--------|---------------|------------|---------------------------------------|---------|---------|------------|-----------|----------|----------|-------------|------------|
| PHJ40  | USA           | Ames       | <a href="#">Check PVP certificate</a> | 56.78   | 20.14   | 0.42       | 40.57     | 71.19    | 41.25    | 0.55        | 35.80      |
| PHJ70  | USA           | Ames       | <a href="#">Check PVP certificate</a> | 67.27   | 9.39    | 0.13       | 58.76     | 74.11    | 37.60    | 0.50        | 38.18      |
| PHJ75  | USA           | Ames       | <a href="#">Check PVP certificate</a> | 58.96   | 9.06    | 0.16       | 49.88     | 73.04    | 24.75    | 0.34        | 48.41      |
| PHK05  | USA           | Ames       | <a href="#">Check PVP certificate</a> | 52.00   | 11.01   | 0.23       | 40.91     | 71.58    | 28.09    | 0.39        | 43.34      |
| PHK29  | USA           | Ames       | <a href="#">Check PVP certificate</a> | 56.69   | 2.89    | 0.05       | 51.60     | 67.55    | 8.04     | 0.13        | 56.06      |
| PHK35  | USA           | Ames       | <a href="#">Check PVP certificate</a> | 63.40   | 10.87   | 0.17       | 53.51     | 72.36    | 44.11    | 0.60        | 29.85      |
| PHK42  | USA           | Ames       | <a href="#">Check PVP certificate</a> | 62.88   | 12.08   | 0.19       | 52.11     | 71.26    | 28.36    | 0.41        | 42.66      |
| PHK76  | USA           | Ames       | <a href="#">Check PVP certificate</a> | 68.64   | 4.02    | 0.06       | 63.92     | 74.93    | 13.00    | 0.17        | 61.69      |
| PHM49  | USA           | Ames       | <a href="#">Check PVP certificate</a> | 59.58   | 6.41    | 0.11       | 52.37     | 77.91    | 25.16    | 0.32        | 54.73      |
| PHM57  | USA           | Ames       | <a href="#">Check PVP certificate</a> | 65.84   | 22.90   | 0.33       | 47.97     | 76.98    | 47.74    | 0.60        | 32.90      |
| PHN11  | USA           | Ames       | <a href="#">Check PVP certificate</a> | 59.10   | 9.53    | 0.17       | 49.71     | 69.96    | 26.29    | 0.38        | 42.76      |
| PHN29  | USA           | Ames       | <a href="#">Check PVP certificate</a> | 62.41   | 7.60    | 0.12       | 54.66     | 75.93    | 25.19    | 0.32        | 51.97      |
| PHN37  | USA           | Ames       | <a href="#">Check PVP certificate</a> | 61.86   | 8.41    | 0.14       | 53.50     | 75.80    | 27.21    | 0.35        | 49.95      |
| PHN73  | USA           | Ames       | <a href="#">Check PVP certificate</a> | 56.93   | 9.69    | 0.17       | 49.87     | 62.67    | .        | .           | .          |
| PHN82  | USA           | Ames       | <a href="#">Check PVP certificate</a> | 65.23   | 11.59   | 0.17       | 55.03     | 74.08    | 32.56    | 0.43        | 42.72      |
| PHP02  | USA           | Ames       | <a href="#">Check PVP certificate</a> | 63.62   | 9.50    | 0.15       | 54.68     | 75.68    | 30.14    | 0.39        | 47.12      |
| PHP55  | USA           | Ames       | <a href="#">Check PVP certificate</a> | 61.07   | 10.85   | 0.18       | 50.97     | 75.52    | 27.85    | 0.36        | 48.99      |
| PHP60  | USA           | Ames       | <a href="#">Check PVP certificate</a> | 63.94   | 9.97    | 0.15       | 54.72     | 74.06    | 36.72    | 0.49        | 38.90      |
| PHR25  | USA           | Ames       | <a href="#">Check PVP certificate</a> | 54.72   | 8.39    | 0.16       | 45.68     | 72.50    | 28.40    | 0.39        | 44.34      |
| PHR32  | USA           | Ames       | <a href="#">Check PVP certificate</a> | 62.30   | 9.21    | 0.15       | 53.43     | 77.68    | 33.19    | 0.41        | 47.10      |
| PHR36  | USA           | Ames       | <a href="#">Check PVP certificate</a> | 62.41   | 8.73    | 0.14       | 53.88     | 71.79    | 27.43    | 0.38        | 44.23      |
| PHR47  | USA           | Ames       | <a href="#">Check PVP certificate</a> | 55.99   | 8.86    | 0.17       | 46.76     | 70.19    | 33.25    | 0.48        | 36.74      |
| PHR62  | USA           | Ames       | <a href="#">Check PVP certificate</a> | 63.80   | 8.39    | 0.13       | 55.64     | 67.50    | 22.80    | 0.35        | 42.55      |
| PHT10  | USA           | Ames       | <a href="#">Check PVP certificate</a> | 63.58   | 9.54    | 0.15       | 54.62     | 72.95    | 31.09    | 0.42        | 42.50      |
| PHT22  | USA           | Ames       | <a href="#">Check PVP certificate</a> | 58.87   | 9.01    | 0.16       | 49.81     | 77.02    | 35.29    | 0.44        | 44.28      |
| PHT55  | USA           | Ames       | <a href="#">Check PVP certificate</a> | 66.95   | 9.71    | 0.14       | 58.20     | 75.85    | 37.16    | 0.47        | 40.97      |
| PHT60  | USA           | Ames       | <a href="#">Check PVP certificate</a> | 57.74   | 7.82    | 0.14       | 49.39     | 70.04    | 23.09    | 0.34        | 45.78      |
| PHT77  | USA           | Ames       | <a href="#">Check PVP certificate</a> | 59.59   | 15.64   | 0.26       | 46.07     | 72.39    | 42.53    | 0.58        | 31.33      |

| Inbred | State/Country  | Panel Type | Pedigree                              | WT_CCMI | MT_CCMI | Ratio_CCMI | Diff_CCMI | WT_CCMII | MT_CCMII | Ratio_CCMII | Diff_CCMII |
|--------|----------------|------------|---------------------------------------|---------|---------|------------|-----------|----------|----------|-------------|------------|
| PHV37  | USA            | Ames       | <a href="#">Check PVP certificate</a> | 56.88   | 2.34    | 0.05       | 52.19     | 68.31    | 8.61     | 0.13        | 56.57      |
| PHV63  | USA            | Ames       | <a href="#">Check PVP certificate</a> | 58.98   | 2.46    | 0.04       | 54.41     | 72.33    | 8.35     | 0.12        | 62.35      |
| PHV78  | USA            | Ames       | <a href="#">Check PVP certificate</a> | 59.66   | 10.15   | 0.17       | 49.91     | 74.08    | 30.85    | 0.41        | 44.29      |
| PHW03  | USA            | Ames       | <a href="#">Check PVP certificate</a> | 56.41   | 10.50   | 0.19       | 46.10     | 71.84    | 41.70    | 0.58        | 31.32      |
| PHW17  | USA            | Ames       | <a href="#">Check PVP certificate</a> | 64.98   | 8.29    | 0.12       | 57.01     | 68.71    | 31.87    | 0.47        | 35.96      |
| PHW20  | USA            | Ames       | <a href="#">Check PVP certificate</a> | 62.60   | 10.81   | 0.17       | 52.67     | 71.14    | 19.40    | 0.28        | 50.65      |
| PHW43  | USA            | Ames       | <a href="#">Check PVP certificate</a> | 52.32   | 6.19    | 0.13       | 44.56     | 69.27    | 18.80    | 0.28        | 48.62      |
| PHW52  | USA            | Ames       | <a href="#">Check PVP certificate</a> | 61.06   | 11.59   | 0.19       | 50.46     | 70.70    | 35.32    | 0.50        | 35.56      |
| PHW65  | USA            | Ames       | <a href="#">Check PVP certificate</a> | 58.45   | 11.37   | 0.20       | 47.74     | 77.79    | 32.06    | 0.40        | 48.28      |
| PHW79  | USA            | Ames       | <a href="#">Check PVP certificate</a> | 61.33   | 9.75    | 0.16       | 52.00     | 73.38    | 34.47    | 0.46        | 40.02      |
| PHZ51  | USA            | Ames       | <a href="#">Check PVP certificate</a> | 58.98   | 9.08    | 0.16       | 49.88     | 75.11    | 31.88    | 0.42        | 44.76      |
| W32    | Wisconsin      | Ames       | Unknown                               | 56.78   | 9.15    | 0.18       | 47.42     | 69.73    | 29.23    | 0.43        | 39.77      |
| Yu796  | North Carolina | Ames       | Unknown                               | 61.29   | 10.62   | 0.17       | 51.36     | 76.65    | 20.03    | 0.26        | 57.66      |
| 33-16  | Indiana        | 302        | Lux Johnson Country white             | 61.98   | 9.77    | 0.15       | 52.70     | 74.69    | 31.92    | 0.42        | 44.14      |
| 38-11  | Indiana        | 302        | Outcross in line from 176A            | 56.79   | 9.11    | 0.17       | 47.47     | 69.26    | 21.05    | 0.31        | 46.57      |
| 81-1   | USDA           | 302        | Iowa 60*Edisto                        | 56.71   | 8.35    | 0.15       | 47.90     | 70.84    | 24.61    | 0.35        | 45.50      |
| A188   | Minnesota      | 302        | [(4-29*64)4-29(4)]                    | 61.37   | 6.30    | 0.10       | 54.40     | 79.69    | 20.40    | 0.25        | 61.51      |
| A214N  | South Africa   | 302        | (B68*HtN)B68(3)                       | 64.40   | 10.37   | 0.15       | 54.94     | 71.92    | 30.15    | 0.42        | 41.94      |
| A239   | Minnesota      | 302        | A73*A347                              | 57.08   | 8.70    | 0.16       | 48.06     | 67.52    | 19.54    | 0.30        | 45.54      |
| A441-5 | South Africa   | 302        | Robyn*Leamming yellow dent            | 58.32   | 8.72    | 0.15       | 49.40     | 66.67    | 23.86    | 0.38        | 40.44      |
| A554   | Minnesota      | 302        | [(WD*W9)WD(2)]                        | 53.57   | 7.06    | 0.14       | 45.34     | 72.85    | 20.96    | 0.29        | 51.59      |
| A619   | Minnesota      | 302        | [(A171*Oh43)Oh43]                     | 53.91   | 6.28    | 0.13       | 46.24     | 65.60    | 17.91    | 0.29        | 44.38      |
| A632   | Minnesota      | 302        | [(Mt42*B14)B14(3)]                    | 60.64   | 11.52   | 0.19       | 50.03     | 72.47    | 29.32    | 0.40        | 43.47      |
| A634   | Minnesota      | 302        | [(Mt42*B14)B14(2)]                    | 57.20   | 9.93    | 0.18       | 47.35     | 73.72    | 26.91    | 0.36        | 47.36      |
| A635   | Minnesota      | 302        | ND203xB14(3)                          | 53.68   | 10.07   | 0.20       | 43.40     | 76.54    | 33.52    | 0.43        | 45.23      |
| A641   | Minnesota      | 302        | ND203*B14                             | 57.75   | 8.20    | 0.15       | 49.13     | 75.71    | 22.08    | 0.29        | 54.50      |
| A654   | Minnesota      | 302        | A116*W9                               | 54.13   | 6.93    | 0.14       | 46.04     | 66.82    | 16.01    | 0.25        | 47.80      |
| A659   | Minnesota      | 302        | Minnesota Synthetic 3                 | 61.39   | 8.13    | 0.13       | 53.18     | 69.12    | 34.13    | 0.50        | 34.47      |

| Inbred    | State/Country   | Panel Type | Pedigree                                              | WT_CCMI | MT_CCMI | Ratio_CCMI | Diff_CCMI | WT_CCMII | MT_CCMII | Ratio_CCMII | Diff_CCMII |
|-----------|-----------------|------------|-------------------------------------------------------|---------|---------|------------|-----------|----------|----------|-------------|------------|
| A661      | Minnesota       | 302        | Minnesota Synthetic AS-A                              | 51.08   | 6.47    | 0.15       | 43.00     | 70.80    | 21.78    | 0.31        | 48.02      |
| A679      | Minnesota       | 302        | [(A662*B73) B73(3)]                                   | 55.61   | 8.82    | 0.17       | 46.37     | 70.01    | 28.38    | 0.41        | 40.92      |
| A680      | Minnesota       | 302        | [(A662*B73) B73(3)]                                   | 59.44   | 6.07    | 0.11       | 52.44     | 69.20    | 27.73    | 0.41        | 40.40      |
| A682      | Minnesota       | 302        | [(AS-D*Mo17) Mo17 (2)]                                | 59.04   | 2.26    | 0.04       | 54.61     | 68.78    | 10.21    | 0.16        | 55.78      |
| Ab28A     | Alabama         | 302        | GT152*38-11                                           | 62.70   | 17.19   | 0.26       | 48.42     | 77.43    | 51.23    | 0.64        | 30.34      |
| B10       | Iowa            | 302        | Iowa Stiff Stalk Synthetic                            | 55.86   | 8.49    | 0.16       | 46.86     | 72.58    | 32.63    | 0.45        | 40.59      |
| B103      | Iowa            | 302        | CIMMYT Pool 41 [Northern Temperate Ranges -1 (NTR-1)] | 57.27   | 8.78    | 0.16       | 48.21     | 70.16    | 25.35    | 0.37        | 43.89      |
| B104      | Iowa            | 302        | BS13(S)C5                                             | 60.10   | 7.31    | 0.12       | 52.32     | 68.92    | 37.17    | 0.55        | 31.43      |
| B105      | Iowa            | 302        | BSSS@C9                                               | 60.84   | 5.94    | 0.10       | 54.07     | 73.65    | 22.51    | 0.30        | 51.27      |
| B109      | Iowa            | 302        | [B73 * BS20(S)C1]B73                                  | 62.81   | 9.53    | 0.15       | 53.78     | 70.99    | 29.01    | 0.41        | 41.71      |
| B14A      | Iowa            | 302        | Cuzco*B14(8)                                          | 60.95   | 16.62   | 0.27       | 46.89     | 71.32    | 42.63    | 0.59        | 29.76      |
| B164      | Minnesota       | 302        | Indiana Reid (Pioneer)                                | 56.08   | 4.99    | 0.09       | 49.50     | 72.85    | 15.52    | 0.22        | 56.53      |
| B2        | Missouri        | 302        | Reid Yellow Dent                                      | 61.22   | 3.39    | 0.06       | 56.22     | 75.90    | 15.20    | 0.20        | 61.02      |
| B37       | Iowa            | 302        | Iowa Stiff Stalk Synthetic                            | 68.69   | 7.75    | 0.11       | 61.43     | 76.37    | 31.11    | 0.40        | 47.19      |
| B46       | Iowa            | 302        | W22*B10                                               | 61.09   | 3.99    | 0.07       | 55.67     | 71.68    | 16.66    | 0.24        | 53.89      |
| B57       | Iowa            | 302        | Midland                                               | 53.59   | 9.85    | 0.20       | 43.45     | 69.66    | 30.06    | 0.44        | 38.91      |
| B64       | Iowa            | 302        | 41.2504B*B14(3)                                       | 61.87   | 5.02    | 0.08       | 55.82     | 71.07    | 15.63    | 0.23        | 53.99      |
| B68       | Iowa            | 302        | 41.2504B*B14(3)                                       | 59.76   | 8.66    | 0.14       | 51.03     | 74.93    | 26.42    | 0.35        | 49.47      |
| B73       | Iowa            | 302        | Iowa Stiff Stalk Synthetic C5                         | 57.43   | 6.84    | 0.12       | 50.49     | 67.19    | 27.67    | 0.42        | 39.36      |
| B73 Htrhm | Iowa            | 302        | Ht1 and rhm1 conversion of B73                        | 63.03   | 7.77    | 0.12       | 55.22     | 68.45    | 30.75    | 0.46        | 36.63      |
| B76       | Iowa            | 302        | [(CL31A*B37)B37]                                      | 57.09   | 7.35    | 0.13       | 48.99     | 72.53    | 24.07    | 0.33        | 48.32      |
| B77       | Iowa            | 302        | Pioneer Two-Ear composite(BS11)                       | 59.36   | 8.40    | 0.14       | 50.76     | 71.02    | 23.29    | 0.34        | 46.95      |
| B79       | Iowa            | 302        | Iowa Two-Ear Synthetic No.1(BSTE)                     | 54.85   | 7.94    | 0.15       | 46.13     | 67.24    | 21.75    | 0.34        | 43.15      |
| B84       | Iowa            | 302        | BS13(S2)C0                                            | 62.57   | 10.22   | 0.16       | 53.04     | 74.93    | 40.73    | 0.54        | 36.45      |
| B97       | Iowa            | 302        | BSCB1@C9                                              | 59.83   | 9.83    | 0.17       | 50.31     | 75.17    | 31.34    | 0.41        | 45.33      |
| C103      | Connecticut     | 302        | Lancaster Surecrop (from Noah Hershey)                | 66.54   | 2.45    | 0.04       | 62.70     | 70.16    | 12.69    | 0.19        | 55.40      |
| C49A      | Minnesota       | 302        | Minn 13                                               | 59.91   | 10.26   | 0.17       | 50.10     | 68.52    | 34.57    | 0.51        | 33.25      |
| CH701-30  | Canada - Harrow | 302        | unknown                                               | 63.79   | 3.74    | 0.06       | 58.81     | 75.33    | 12.19    | 0.16        | 62.97      |



| Inbred  | State/Country   | Panel Type | Pedigree                            | WT_CCMI | MT_CCMI | Ratio_CCMI | Diff_CCMI | WT_CCMII | MT_CCMII | Ratio_CCMII | Diff_CCMII |
|---------|-----------------|------------|-------------------------------------|---------|---------|------------|-----------|----------|----------|-------------|------------|
| CH9     | Canada - Harrow | 302        | Funk's G176                         | 63.08   | 7.22    | 0.11       | 55.65     | 78.91    | 19.47    | 0.24        | 61.27      |
| CI187-2 | USDA            | 302        | Krug                                | 63.56   | 13.71   | 0.21       | 51.74     | 75.76    | 44.70    | 0.58        | 33.99      |
| CI21E   | USDA            | 302        | Hy*C.L21                            | 60.84   | 16.08   | 0.26       | 47.14     | 69.99    | 36.02    | 0.53        | 33.95      |
| CI28A   | USDA            | 302        | Recovered Blight Resistance B2      | 58.17   | 4.11    | 0.07       | 52.39     | 75.88    | 16.30    | 0.22        | 59.99      |
| CI31A   | USDA            | 302        | Midland OP                          | 60.45   | 7.91    | 0.13       | 52.29     | 64.94    | 24.96    | 0.41        | 37.06      |
| CIBA    | USDA            | 302        | [(C.I.3*related inbred) C.I.3 (2)]  | 49.55   | 7.67    | 0.21       | 40.52     | 70.63    | 25.01    | 0.36        | 44.85      |
| CI44    | USDA            | 302        | L97*Oh07(2)                         | 56.54   | 5.27    | 0.10       | 49.81     | 70.45    | 21.40    | 0.31        | 47.88      |
| CI64    | USDA            | 302        | K64*Mo21A                           | 54.98   | 5.48    | 0.11       | 47.95     | 69.49    | 19.94    | 0.29        | 47.88      |
| CI66    | USDA            | 302        | L97*K55 (2)                         | 59.06   | 7.29    | 0.13       | 51.20     | 73.93    | 19.74    | 0.27        | 54.18      |
| CI7     | USDA            | 302        | [(L317*33-16)33-16(2)]              | 58.49   | 6.56    | 0.11       | 51.07     | 70.70    | 18.74    | 0.27        | 50.64      |
| CI90C   | USDA            | 302        | CI90A = L97*M14                     | 62.79   | 7.88    | 0.12       | 54.88     | 76.14    | 24.17    | 0.31        | 53.19      |
| CI91B   | USDA            | 302        | L97*A71                             | 58.21   | 13.98   | 0.25       | 45.69     | 77.83    | 40.98    | 0.51        | 40.22      |
| CM105   | Canada-Morden   | 302        | CMV3xB14(2)                         | 63.47   | 2.56    | 0.04       | 59.25     | 72.23    | 5.87     | 0.09        | 64.46      |
| CM174   | Canada-Morden   | 302        | CMV3xB14(2)                         | 57.27   | 6.95    | 0.13       | 49.46     | 73.59    | 18.45    | 0.25        | 54.88      |
| CM37    | Canada-Morden   | 302        | KE3                                 | 59.22   | 9.31    | 0.16       | 49.99     | 80.90    | 22.51    | 0.27        | 61.25      |
| CM7     | Canada-Morden   | 302        | W85*CMV3                            | 66.55   | 8.75    | 0.13       | 58.41     | 79.58    | 21.20    | 0.26        | 60.63      |
| CML10   | Mexico          | 302        | Pop.21 = Tuxpeño                    | 62.06   | 11.89   | 0.19       | 51.34     | 64.26    | 38.38    | 0.64        | 23.91      |
| CML103  | Mexico          | 302        | Pop. 44                             | 57.10   | 6.43    | 0.12       | 49.63     | 74.36    | 18.01    | 0.24        | 56.35      |
| CML108  | Mexico          | 302        | Pop. 44                             | 55.48   | 3.00    | 0.06       | 50.20     | 61.44    | 10.96    | 0.20        | 44.98      |
| CML154Q | Mexico          | 302        | Pop. 62                             | 65.55   | 20.31   | 0.29       | 49.41     | 75.77    | 47.79    | 0.61        | 31.19      |
| CML157Q | Mexico          | 302        | Pop. 62                             | 61.28   | 4.63    | 0.08       | 55.44     | 72.21    | 13.10    | 0.18        | 57.86      |
| CML158Q | Mexico          | 302        | Pop. 62                             | 66.27   | 4.47    | 0.07       | 61.03     | 75.18    | 18.79    | 0.25        | 56.76      |
| CML218  | Mexico          | 302        | EV = Streak resist. source          | 59.32   | 16.62   | 0.28       | 45.11     | 75.69    | 44.61    | 0.58        | 33.98      |
| CML228  | Mexico          | 302        | Suwan-1/SR                          | 62.14   | 6.65    | 0.11       | 55.01     | 70.61    | 28.45    | 0.41        | 41.68      |
| CML247  | Mexico          | 302        | Pool 24 (Tuxpeño)                   | 66.25   | 3.37    | 0.05       | 61.75     | 76.57    | 14.70    | 0.19        | 62.39      |
| CML254  | Mexico          | 302        | Pop. 21 = Tuxpeño Sequia            | 59.30   | 4.41    | 0.08       | 53.43     | 73.09    | 14.61    | 0.20        | 57.69      |
| CML277  | Mexico          | 302        | Pop. 43 = La Posta (Tux.)           | 63.36   | 6.02    | 0.09       | 56.78     | 69.61    | 16.30    | 0.24        | 51.38      |
| CML311  | Mexico          | 302        | Pop. 500 = Inter. Mat. Wh. Dent Mix | 61.10   | 8.25    | 0.13       | 52.77     | 79.29    | 32.21    | 0.39        | 50.22      |

| Inbred | State/Country       | Panel Type | Pedigree                                           | WT_CCMI | MT_CCMI | Ratio_CCMI | Diff_CCMI | WT_CCMII | MT_CCMII | Ratio_CCMII | Diff_CCMII |
|--------|---------------------|------------|----------------------------------------------------|---------|---------|------------|-----------|----------|----------|-------------|------------|
| CML314 | Mexico              | 302        | Pop. 600 = Late Mat. Wh. Dent Mix                  | 60.27   | 16.98   | 0.28       | 45.90     | 73.43    | 34.86    | 0.47        | 39.73      |
| CML321 | Mexico              | 302        | Pop. 502 = Mex. DK + US                            | 59.25   | 4.36    | 0.08       | 53.40     | 70.57    | 11.21    | 0.17        | 57.32      |
| CML322 | Mexico              | 302        | Recyc. US + Mex                                    | 61.10   | 4.83    | 0.08       | 55.11     | 72.34    | 21.38    | 0.30        | 50.51      |
| CML323 | Mexico              | 302        | Pop. 33 Amar. Subtrop. Mix                         | 57.09   | 7.48    | 0.15       | 48.91     | 71.55    | 24.61    | 0.35        | 46.48      |
| CML331 | Mexico              | 302        | Suwan/Pop.47 * Mp78:518                            | 58.16   | 8.07    | 0.14       | 49.68     | 69.91    | 21.71    | 0.32        | 46.86      |
| CML332 | Mexico              | 302        | Suwan/Pop.47 * Mp78:518                            | 62.01   | 8.76    | 0.14       | 53.42     | 66.04    | 19.03    | 0.31        | 43.98      |
| CML333 | Mexico              | 302        | Pop. 590                                           | 57.37   | 2.84    | 0.05       | 52.39     | 71.12    | 12.82    | 0.19        | 56.61      |
| CML341 | Mexico              | 302        | Pop. 43 = La Posta (Tux.)                          | 60.23   | 3.19    | 0.06       | 55.27     | 75.88    | 9.37     | 0.13        | 66.30      |
| CML38  | Mexico              | 302        | Pop. 32                                            | 61.54   | 17.38   | 0.28       | 47.01     | 70.83    | 45.41    | 0.66        | 26.56      |
| CML45  | Mexico              | 302        | Pop. 43 = La Posta (Tux.)                          | 56.35   | 2.91    | 0.06       | 51.22     | 79.84    | 9.89     | 0.12        | 71.28      |
| CML52  | Mexico              | 302        | Pop. 79 = STA ROSA                                 | 61.78   | 7.28    | 0.12       | 54.18     | 69.73    | 19.12    | 0.28        | 48.97      |
| CML69  | Mexico              | 302        | Pop. 36 = Cogollero (Caribbean)                    | 66.51   | 9.85    | 0.14       | 57.61     | 70.75    | 27.43    | 0.39        | 42.80      |
| CML91  | Mexico              | 302        | Pop. 42 Northern Temp./German Mix                  | 61.61   | 13.54   | 0.22       | 49.73     | 72.14    | 36.41    | 0.51        | 36.55      |
| CML92  | Mexico              | 302        | Pop. 42 Northern Temp./German Mix                  | 60.28   | 10.45   | 0.17       | 50.37     | 71.72    | 31.62    | 0.45        | 40.32      |
| CMV3   | Minnesota           | 302        | A21*W185                                           | 55.23   | 6.42    | 0.13       | 47.60     | 68.41    | 20.90    | 0.32        | 45.52      |
| Co106  | Canada-Ottawa       | 302        | University of Wisconsin CR11                       | 51.81   | 7.90    | 0.17       | 42.83     | 74.51    | 22.44    | 0.30        | 52.53      |
| Co125  | Canada-Ontario      | 302        | unknown                                            | 57.04   | 5.44    | 0.10       | 50.24     | 74.53    | 14.53    | 0.20        | 59.75      |
| Co255  | Canada-Ottawa       | 302        | INRA 258                                           | 60.58   | 12.23   | 0.20       | 49.49     | 80.68    | 37.28    | 0.44        | 47.51      |
| D940Y  | South Africa        | 302        | BO60W(A166NxB566Y-B560Y)B557Y                      | 61.40   | 12.91   | 0.21       | 49.92     | 68.22    | 28.54    | 0.43        | 38.31      |
| DE1    | Delaware B          | 302        | P3140*P3751                                        | 56.48   | 6.84    | 0.13       | 48.67     | 70.30    | 22.49    | 0.33        | 46.69      |
| DE2    | Delaware B          | 302        | P3140*P3751                                        | 56.78   | 7.30    | 0.13       | 48.69     | 68.88    | 23.87    | 0.36        | 43.47      |
| DE811  | Delaware            | 302        | [B68*[B37Ht*(C103*Mp3204 double cross) Selection]] | 66.41   | 2.42    | 0.04       | 62.58     | 72.05    | 9.14     | 0.13        | 61.24      |
| E2558W | South Africa        | 302        | N6*M162W^3                                         | 53.53   | 11.82   | 0.24       | 42.04     | 71.70    | 34.47    | 0.48        | 37.71      |
| EP1    | Spain               | 302        | Spanish population 'Lizargarate'                   | 53.66   | 10.60   | 0.21       | 43.02     | 82.44    | 49.75    | 0.56        | 38.58      |
| F2     | Puy-de-Dome, France | 302        | OP Lacaune                                         | 59.08   | 18.41   | 0.31       | 43.63     | 69.57    | 50.25    | 0.74        | 20.42      |
| F2834T | South Africa        | 302        | Teko Yellow                                        | 60.56   | 5.35    | 0.09       | 54.17     | 72.68    | 21.35    | 0.29        | 50.99      |
| F44    | Florida             | 302        | Smith (Old Florida variety)                        | 59.76   | 9.07    | 0.15       | 50.75     | 69.99    | 32.62    | 0.47        | 37.03      |
| F7     | France-Peronne      | 302        | OP Lacaune                                         | 56.66   | 8.48    | 0.16       | 47.75     | 77.82    | 26.52    | 0.33        | 53.36      |

| Inbred  | State/Country | Panel Type | Pedigree                                                                 | WT_CCMI | MT_CCMI | Ratio_CCMI | Diff_CCMI | WT_CCMII | MT_CCMII | Ratio_CCMII | Diff_CCMII |
|---------|---------------|------------|--------------------------------------------------------------------------|---------|---------|------------|-----------|----------|----------|-------------|------------|
| GA209   | Georgia       | 302        | T61*NC37                                                                 | 61.35   | 5.80    | 0.09       | 54.73     | 72.56    | 13.78    | 0.19        | 57.72      |
| GT112   | Georgia       | 302        | Multiple cross (includes Whatley, Cuban, Garrick, Creole, and 12% other) | 59.51   | 11.22   | 0.19       | 49.01     | 67.22    | 32.41    | 0.50        | 33.42      |
| H100    | Indiana       | 302        | N28*H91                                                                  | 61.42   | 9.92    | 0.16       | 51.99     | 78.21    | 28.77    | 0.35        | 51.85      |
| H105W   | Indiana       | 302        | 33-16*A632(3)                                                            | 62.39   | 8.77    | 0.14       | 53.83     | 73.13    | 21.87    | 0.30        | 51.14      |
| H84     | Indiana       | 302        | [B37*GE440]Ht Ht                                                         | 63.78   | 14.29   | 0.22       | 51.59     | 75.77    | 41.42    | 0.53        | 36.99      |
| H91     | Indiana       | 302        | [B37*GE440]B14(4)]Ht Ht                                                  | 53.67   | 9.80    | 0.20       | 43.57     | 74.45    | 24.65    | 0.33        | 50.43      |
| H95     | Indiana       | 302        | Oh43*C.I.90A                                                             | 62.32   | 8.09    | 0.13       | 54.22     | 67.40    | 22.83    | 0.35        | 42.38      |
| H99     | Indiana       | 302        | Illinois Synthetic 60C                                                   | 60.75   | 8.25    | 0.13       | 52.39     | 71.45    | 32.16    | 0.46        | 39.46      |
| Hi27    | Hawaii        | 302        | [CM104(India)*MV source]BC6                                              | 63.64   | 9.73    | 0.15       | 54.55     | 69.52    | 25.36    | 0.38        | 42.99      |
| Hp301   | Indiana       | 302        | Supergold                                                                | 52.11   | 6.64    | 0.14       | 44.02     | 70.13    | 18.87    | 0.27        | 49.75      |
| I205    | Iowa          | 302        | Iodent                                                                   | 60.77   | 10.94   | 0.18       | 50.58     | 75.36    | 50.89    | 0.66        | 27.81      |
| IA2132  | Iowa          | 302        | [(TSR * 45 ) * 4329 ]                                                    | 53.74   | 8.58    | 0.18       | 44.48     | 66.72    | 36.81    | 0.57        | 28.73      |
| IA5125  | Iowa          | 302        | [(IP39*Tendermost)*IP39]                                                 | 53.59   | 5.19    | 0.11       | 46.63     | 72.79    | 16.42    | 0.23        | 55.63      |
| IDS28   | Iowa          | 302        | Yellow Pearl                                                             | 60.93   | 10.08   | 0.16       | 51.34     | 68.59    | 30.26    | 0.45        | 37.27      |
| IDS69   | Iowa          | 302        | South American Popcorn                                                   | 58.35   | 7.13    | 0.13       | 50.52     | 72.43    | 22.91    | 0.32        | 49.24      |
| IL677A  | Illinois      | 302        | [(Bolivia 1035*IL44b)*IL422a]                                            | 54.95   | 5.33    | 0.10       | 48.03     | 74.06    | 23.98    | 0.32        | 50.51      |
| Ill.Hy  | Illinois      | 302        | Illinois High Yield                                                      | 53.59   | 2.84    | 0.06       | 48.24     | 66.28    | 9.17     | 0.15        | 53.27      |
| K148    | Kansas        | 302        | Yellow selection No. 1 (Pride of Saline, yellow strain)                  | 57.56   | 11.22   | 0.20       | 46.87     | 73.47    | 37.51    | 0.50        | 37.37      |
| K4      | Kansas        | 302        | Kansas Sunflower                                                         | 54.30   | 8.04    | 0.16       | 45.47     | 71.01    | 25.19    | 0.36        | 45.21      |
| K55     | Kansas        | 302        | Pride of Saline                                                          | 54.84   | 6.59    | 0.13       | 47.04     | 72.91    | 22.32    | 0.30        | 50.43      |
| K64     | Kansas        | 302        | Pride of Saline                                                          | 55.14   | 5.40    | 0.11       | 48.18     | 70.63    | 21.34    | 0.31        | 48.17      |
| Ki11    | Thailand      | 302        | Suwan 1(S)C4-S8-18-7                                                     | 68.56   | 7.91    | 0.11       | 61.18     | 76.33    | 20.46    | 0.26        | 56.83      |
| Ki14    | Thailand      | 302        | Suwan 1(S)C4-S8-19-5                                                     | 58.54   | 6.76    | 0.12       | 50.99     | 70.13    | 23.45    | 0.34        | 45.58      |
| Ki21    | Thailand      | 302        | Pacific 9-S8-45                                                          | 57.53   | 9.20    | 0.16       | 48.21     | 70.90    | 28.99    | 0.42        | 41.60      |
| Ki3     | Thailand      | 302        | Suwan 1(S)C4-S8-5-3                                                      | 59.69   | 4.25    | 0.07       | 53.97     | 70.94    | 20.18    | 0.29        | 49.67      |
| Ki43    | Thailand      | 302        | Suwan 3(S)C3-S7-138                                                      | 64.98   | 9.56    | 0.14       | 56.13     | 75.48    | 26.71    | 0.35        | 49.96      |
| KUI2007 | Thailand      | 302        | DK version of Ki3; Suwan 1(S)C4-S8-5-3                                   | 58.67   | 10.46   | 0.18       | 48.60     | 74.66    | 39.38    | 0.52        | 37.31      |
| KUI2021 | Thailand      | 302        | DK version of Ki9; Suwan 1(S)C4-S8-16-7                                  | 59.28   | 14.00   | 0.24       | 46.85     | 72.12    | 44.86    | 0.62        | 28.82      |

| Inbred | State/Country  | Panel Type | Pedigree                                   | WT_CCMI | MT_CCMI | Ratio_CCMI | Diff_CCMI | WT_CCMII | MT_CCMII | Ratio_CCMII | Diff_CCMII |
|--------|----------------|------------|--------------------------------------------|---------|---------|------------|-----------|----------|----------|-------------|------------|
| KUI44  | Thailand       | 302        | KS 6(S)C2-S7-366                           | 61.64   | 14.62   | 0.23       | 49.02     | 73.98    | 44.33    | 0.59        | 31.87      |
| Ky21   | Kentucky       | 302        | Boone County White                         | 60.72   | 13.49   | 0.22       | 48.78     | 71.43    | 38.98    | 0.55        | 33.24      |
| Ky226  | Kentucky       | 302        | NCLauDA*Coahuila 8                         | 64.84   | 11.52   | 0.17       | 54.64     | 71.08    | 39.18    | 0.55        | 32.57      |
| Ky228  | Kentucky       | 302        | Pride of Saline                            | 65.59   | 12.30   | 0.18       | 54.93     | 76.97    | 34.62    | 0.44        | 44.83      |
| L317   | Iowa           | 302        | Lancaster surecrop (from Noah Hershey)     | 64.05   | 20.82   | 0.31       | 47.42     | 75.80    | 44.90    | 0.58        | 33.86      |
| L578   | Louisiana      | 302        | Unknown                                    | 56.89   | 8.05    | 0.15       | 48.30     | 69.63    | 27.87    | 0.41        | 40.86      |
| M162W  | South Africa   | 302        | K64R**2 x B1138T                           | 56.04   | 6.47    | 0.12       | 48.44     | 68.50    | 18.32    | 0.28        | 48.00      |
| M37W   | South Africa   | 302        | 21A**2 x Jellicorse                        | 59.58   | 8.32    | 0.14       | 51.06     | 71.41    | 17.06    | 0.24        | 53.16      |
| Mo.G   | Missouri       | 302        | Mastadon variety from Pennsylvania         | 63.13   | 15.29   | 0.23       | 50.19     | 69.25    | 39.54    | 0.59        | 29.72      |
| Mo17   | Missouri       | 302        | C.1187-2*C103                              | 57.94   | 2.30    | 0.04       | 55.39     | 76.23    | 9.82     | 0.13        | 66.40      |
| Mo18W  | Missouri       | 302        | Wf9*Mo22(2)                                | 64.81   | 9.07    | 0.13       | 56.28     | 74.11    | 24.47    | 0.33        | 50.12      |
| Mo1W   | Missouri       | 302        | [Mo22*Wf9(2)]                              | 61.75   | 8.03    | 0.13       | 53.64     | 76.45    | 22.68    | 0.29        | 54.96      |
| Mo24W  | Missouri       | 302        | (K10*K49/Ziler Hi-cob) (pipe com)          | 51.29   | 6.52    | 0.14       | 43.20     | 66.78    | 17.10    | 0.27        | 46.74      |
| Mo44   | Missouri       | 302        | Mo22*Pioneer Mexican Synthetic 17          | 63.21   | 3.25    | 0.05       | 58.51     | 71.11    | 11.41    | 0.17        | 57.88      |
| Mo45   | Missouri       | 302        | Race Negro de Tierra Caliente (Guatemala)  | 65.70   | 12.95   | 0.19       | 54.61     | 77.98    | 44.41    | 0.55        | 37.30      |
| Mo46   | Missouri       | 302        | Race Cravo Paulista (Brazil)               | 63.52   | 3.03    | 0.05       | 58.99     | 76.08    | 8.55     | 0.12        | 67.32      |
| Mo47   | Missouri       | 302        | Race Candela (Ecuador)                     | 64.09   | 12.78   | 0.19       | 52.95     | 76.83    | 32.07    | 0.40        | 46.96      |
| Mp339  | Mississippi    | 302        | T61*Hill Yellow Dent                       | 59.85   | 12.69   | 0.21       | 48.38     | 80.20    | 30.14    | 0.36        | 53.34      |
| MS1334 | Michigan       | 302        | [(Golden glow * Maize Amargo)*Golden Glow] | 60.06   | 6.37    | 0.11       | 52.92     | 77.16    | 14.04    | 0.18        | 63.81      |
| MS153  | Michigan       | 302        | Iowa stiff stalk synthetic                 | 56.63   | 12.36   | 0.23       | 45.07     | 72.57    | 37.49    | 0.52        | 36.16      |
| MS71   | Michigan       | 302        | A619*R168                                  | 60.19   | 6.97    | 0.12       | 52.65     | 71.53    | 13.47    | 0.19        | 56.58      |
| Mt42   | Minnesota      | 302        | Minnesota No.13 (Owen's)                   | 56.32   | 10.40   | 0.19       | 46.07     | 77.29    | 29.75    | 0.38        | 49.69      |
| N192   | Nebraska       | 302        | CM105*B73                                  | 56.42   | 7.84    | 0.14       | 47.93     | 71.46    | 33.15    | 0.47        | 38.57      |
| N28Ht  | Nebraska       | 302        | N28= BSSS                                  | 60.50   | 8.91    | 0.15       | 51.66     | 77.25    | 31.74    | 0.40        | 47.84      |
| N6     | Nebraska       | 302        | Hays Golden                                | 61.95   | 6.97    | 0.11       | 54.58     | 68.05    | 23.57    | 0.36        | 42.61      |
| N7A    | Nebraska       | 302        | Oh07*Stiff stalk Synthetic                 | 58.32   | 8.29    | 0.15       | 49.70     | 70.41    | 27.93    | 0.40        | 41.88      |
| NC222  | North Carolina | 302        | Jarvis Golden Prolific                     | 60.77   | 13.75   | 0.22       | 48.66     | 71.34    | 34.26    | 0.48        | 37.41      |
| NC230  | North Carolina | 302        | K55*Yellow line or inbred                  | 54.70   | 7.27    | 0.14       | 46.43     | 74.31    | 21.31    | 0.29        | 53.27      |

| Inbred | State/Country  | Panel Type | Pedigree                                                                 | WT_CCMI | MT_CCMI | Ratio_CCMI | Diff_CCMI | WT_CCMII | MT_CCMII | Ratio_CCMII | Diff_CCMII |
|--------|----------------|------------|--------------------------------------------------------------------------|---------|---------|------------|-----------|----------|----------|-------------|------------|
| NC232  | North Carolina | 302        | [(T204*Low Ear outercross) T204 (2)]                                     | 59.98   | 6.19    | 0.11       | 52.96     | 68.03    | 20.89    | 0.32        | 45.02      |
| NC250  | North Carolina | 302        | [(Nigeria Composite ARb*B37)B37)                                         | 68.20   | 7.90    | 0.11       | 60.80     | 72.88    | 25.18    | 0.35        | 47.79      |
| NC258  | North Carolina | 302        | TZ(2)*[(NC248*246)*C103]                                                 | 61.20   | 16.51   | 0.27       | 47.24     | 73.03    | 47.65    | 0.65        | 27.55      |
| NC260  | North Carolina | 302        | [(Mo44*Mo17)Mo44(3)]                                                     | 57.49   | 4.78    | 0.09       | 51.18     | 74.29    | 12.88    | 0.18        | 60.91      |
| NC262  | North Carolina | 302        | TZ (TZ=McNair 14*18)                                                     | 60.53   | 11.92   | 0.20       | 49.64     | 74.36    | 39.19    | 0.52        | 37.07      |
| NC264  | North Carolina | 302        | [(SC76*Gaspe)Gaspe]SC76(3)                                               | 61.33   | 10.71   | 0.17       | 51.34     | 70.65    | 29.13    | 0.42        | 41.12      |
| NC268  | North Carolina | 302        | (B73*NC250) B73                                                          | 53.70   | 5.96    | 0.12       | 46.23     | 70.88    | 18.16    | 0.27        | 51.42      |
| NC290A | North Carolina | 302        | McNair inbred lines 14*18 (largely of C103 origin); sister line of NC290 | 65.40   | 7.56    | 0.11       | 57.95     | 68.90    | 27.40    | 0.41        | 40.29      |
| NC292  | North Carolina | 302        | [(B73*NC250) B73 (3)]                                                    | 63.51   | 8.02    | 0.12       | 55.57     | 68.87    | 27.12    | 0.41        | 40.51      |
| NC294  | North Carolina | 302        | [(B73*NC250) B73]                                                        | 60.97   | 6.72    | 0.11       | 53.67     | 72.05    | 23.46    | 0.33        | 48.20      |
| NC298  | North Carolina | 302        | PioneerX105A * H-5 * Agroceres I55                                       | 69.17   | 4.77    | 0.07       | 63.99     | 75.13    | 19.84    | 0.26        | 55.75      |
| NC304  | North Carolina | 302        | (H5*PioneerX105A)*H101                                                   | 67.07   | 4.32    | 0.06       | 62.00     | 73.12    | 16.72    | 0.23        | 55.81      |
| NC306  | North Carolina | 302        | (B73*NC250)*B73                                                          | 63.65   | 6.53    | 0.10       | 56.74     | 73.78    | 21.67    | 0.30        | 52.21      |
| NC308  | North Carolina | 302        | (B73*NC250)*B73                                                          | 64.38   | 8.88    | 0.13       | 55.94     | 68.33    | 27.60    | 0.42        | 39.32      |
| NC310  | North Carolina | 302        | improved B73-type derived from NC250*B73^3                               | 61.34   | 7.39    | 0.12       | 53.63     | 69.16    | 24.38    | 0.36        | 43.40      |
| NC312  | North Carolina | 302        | (B73*NC250)*B73                                                          | 67.22   | 9.15    | 0.13       | 58.87     | 72.25    | 20.87    | 0.29        | 50.84      |
| NC314  | North Carolina | 302        | B73*NC250                                                                | 61.96   | 4.91    | 0.08       | 56.00     | 71.31    | 19.30    | 0.27        | 50.97      |
| NC316  | North Carolina | 302        | (B73Ht1rhm1*NC250)B73Ht1rhm1^3                                           | 62.63   | 7.14    | 0.11       | 55.21     | 69.65    | 25.95    | 0.38        | 42.64      |
| NC318  | North Carolina | 302        | [(SC76*B52)SC76(3)]                                                      | 63.30   | 11.22   | 0.17       | 53.16     | 77.57    | 33.46    | 0.42        | 46.70      |
| NC320  | North Carolina | 302        | [(SC76*B52)SC76(3)]                                                      | 64.47   | 10.25   | 0.15       | 55.11     | 74.84    | 28.38    | 0.37        | 47.57      |
| NC322  | North Carolina | 302        | [(SC76*B52)SC76(3)]; sister line to NC318                                | 65.82   | 10.38   | 0.15       | 56.50     | 73.39    | 39.53    | 0.53        | 35.43      |
| NC324  | North Carolina | 302        | B73*NC250                                                                | 50.52   | 3.43    | 0.08       | 44.48     | 63.88    | 13.55    | 0.23        | 45.98      |
| NC326  | North Carolina | 302        | [(B73*NC250)*B73(3)]                                                     | 59.72   | 7.92    | 0.13       | 51.48     | 73.83    | 31.30    | 0.42        | 43.52      |
| NC328  | North Carolina | 302        | [(B73*NC250)*B73(3)]                                                     | 62.25   | 10.04   | 0.16       | 52.81     | 73.60    | 33.84    | 0.45        | 40.90      |
| NC33   | North Carolina | 302        | Weekley's Improved                                                       | 62.66   | 7.90    | 0.12       | 54.73     | 73.19    | 23.84    | 0.33        | 49.43      |
| NC330  | North Carolina | 302        | [(B73*NC250)*B73(4)]                                                     | 57.41   | 8.51    | 0.15       | 48.55     | 65.65    | 28.62    | 0.46        | 34.70      |
| NC332  | North Carolina | 302        | (SC76*B52); sister line of NC334                                         | 61.60   | 11.57   | 0.19       | 51.06     | 71.41    | 32.63    | 0.46        | 38.99      |
| NC334  | North Carolina | 302        | (SC76*B52); sister line of NC332                                         | 62.67   | 10.45   | 0.16       | 52.99     | 77.66    | 31.32    | 0.39        | 48.77      |

| Inbred | State/Country  | Panel Type | Pedigree                                             | WT_CCMI | MT_CCMI | Ratio_CCMI | Diff_CCMI | WT_CCMII | MT_CCMII | Ratio_CCMII | Diff_CCMII |
|--------|----------------|------------|------------------------------------------------------|---------|---------|------------|-----------|----------|----------|-------------|------------|
| NC338  | North Carolina | 302        | [PioneerX105A*H5] * [Pioneer304B*Agrocere504]        | 58.84   | 4.86    | 0.09       | 52.61     | 73.27    | 22.05    | 0.30        | 51.17      |
| NC342  | North Carolina | 302        | McNair inbreds 14*18(of Coker 811A x C103 origin)    | 60.80   | 19.84   | 0.33       | 44.53     | 74.63    | 39.86    | 0.53        | 36.83      |
| NC344  | North Carolina | 302        | TZ(2)*[(NC248*246)*C103]; Sister line of NC258       | 58.79   | 11.66   | 0.20       | 47.91     | 69.82    | 38.01    | 0.56        | 31.91      |
| NC348  | North Carolina | 302        | PioneerX105A * H-5 * Agrocere155                     | 70.55   | 4.17    | 0.06       | 65.92     | 75.26    | 18.40    | 0.24        | 57.23      |
| NC350  | North Carolina | 302        | (H5*PioneerX105A)*H101                               | 64.79   | 12.52   | 0.18       | 53.91     | 75.01    | 35.80    | 0.47        | 41.05      |
| NC356  | North Carolina | 302        | TROPHY SYN                                           | 56.74   | 6.38    | 0.12       | 49.27     | 70.27    | 22.63    | 0.33        | 46.51      |
| NC358  | North Carolina | 302        | TROPHY SYN                                           | 56.07   | 12.42   | 0.23       | 44.42     | 71.03    | 36.50    | 0.53        | 34.95      |
| NC360  | North Carolina | 302        | Agrocere155*PioneerX105A/NC262                       | 60.59   | 10.04   | 0.16       | 50.99     | 70.06    | 26.07    | 0.38        | 43.10      |
| NC362  | North Carolina | 302        | Agrocere155*PioneerX105A/NC262                       | 57.20   | 11.25   | 0.20       | 46.46     | 72.53    | 33.78    | 0.47        | 39.48      |
| NC364  | North Carolina | 302        | Agrocere155*PioneerX105A/NC262                       | 56.88   | 6.85    | 0.13       | 49.10     | 69.40    | 22.23    | 0.34        | 45.68      |
| NC366  | North Carolina | 302        | FLA Syn                                              | 64.51   | 14.47   | 0.21       | 52.26     | 75.73    | 46.23    | 0.60        | 32.55      |
| NC368  | North Carolina | 302        | [B73*NC250]/[(B73*NC250)*B73]                        | 62.83   | 7.25    | 0.11       | 55.36     | 66.27    | 24.75    | 0.40        | 39.08      |
| NC370  | North Carolina | 302        | [(SC76*B52)SC76(3)]                                  | 61.06   | 7.88    | 0.13       | 52.99     | 72.96    | 30.66    | 0.42        | 42.90      |
| NC372  | North Carolina | 302        | [(B73*Pa91)*B73]                                     | 57.36   | 8.05    | 0.14       | 48.81     | 68.52    | 30.82    | 0.47        | 36.65      |
| ND246  | North Dakota   | 302        | W755*W771                                            | 65.04   | 7.89    | 0.12       | 57.34     | 80.30    | 19.88    | 0.24        | 62.82      |
| Oh40B  | Ohio           | 302        | Eight line composite of Lancaster Surecrop lines     | 60.81   | 6.77    | 0.11       | 53.47     | 72.40    | 17.38    | 0.24        | 54.22      |
| Oh43   | Ohio           | 302        | Oh40B*W8                                             | 59.08   | 8.67    | 0.15       | 50.27     | 63.18    | 24.46    | 0.42        | 35.10      |
| Oh43E  | Ohio           | 302        | ERF/Oh43; ERF=LeamingxReid + other Pioneer inbreds   | 61.59   | 7.04    | 0.11       | 54.14     | 70.23    | 27.88    | 0.40        | 41.68      |
| Oh603  | Ohio           | 302        | « Syn of Va58, OhS3267, H95, Va26, Coas. Trop. FL. » | 54.92   | 9.13    | 0.18       | 45.40     | 66.62    | 23.71    | 0.37        | 40.51      |
| Oh7b   | Ohio           | 302        | [(Oh07*38-11)Oh07]                                   | 56.58   | 6.63    | 0.12       | 48.92     | 71.07    | 24.73    | 0.35        | 45.70      |
| Os420  | Iowa           | 302        | Osterland yellow dent                                | 54.31   | 7.19    | 0.14       | 46.06     | 71.76    | 21.03    | 0.30        | 50.03      |
| P39    | Indiana        | 302        | Purdue Bantam                                        | 49.16   | 6.65    | 0.16       | 40.77     | 67.47    | 17.38    | 0.27        | 47.44      |
| Pa762  | Pennsylvania   | 302        | Oh43*Pa70L                                           | 59.10   | 10.38   | 0.18       | 49.12     | 62.68    | 23.58    | 0.42        | 35.21      |
| Pa875  | Pennsylvania   | 302        | Wf9 Synthetic (original)                             | 63.00   | 9.40    | 0.15       | 54.07     | 66.24    | 27.52    | 0.44        | 36.52      |
| Pa880  | Pennsylvania   | 302        | Wf9 Synthetic C3                                     | 59.52   | 7.94    | 0.14       | 51.25     | 66.68    | 20.01    | 0.31        | 43.97      |
| Pa91   | Pennsylvania   | 302        | (Wf9*Oh43)S4*[(38-11*L317)38-11]S4                   | 62.96   | 10.57   | 0.16       | 53.23     | 72.59    | 30.19    | 0.42        | 42.84      |
| R168   | Illinois       | 302        | Illinois Synthetic 60C                               | 63.65   | 12.39   | 0.19       | 52.74     | 72.66    | 30.44    | 0.42        | 42.69      |
| R177   | Illinois       | 302        | Germplasm 230B(Snelling Corn Borer Synthetic)        | 65.82   | 9.00    | 0.13       | 57.44     | 80.44    | 38.04    | 0.45        | 46.48      |

| Inbred | State/Country  | Panel Type | Pedigree                                                       | WT_CCMI | MT_CCMI | Ratio_CCMI | Diff_CCMI | WT_CCMII | MT_CCMII | Ratio_CCMII | Diff_CCMII |
|--------|----------------|------------|----------------------------------------------------------------|---------|---------|------------|-----------|----------|----------|-------------|------------|
| R229   | Illinois       | 302        | [(479*B73)B73(2)]S6; 479 is a Brazilian inbred of Tuxpeño type | 64.34   | 6.98    | 0.11       | 57.19     | 69.36    | 29.21    | 0.43        | 39.28      |
| R4     | Illinois       | 302        | Funk Yellow dent                                               | 54.72   | 7.36    | 0.16       | 46.38     | 69.69    | 18.43    | 0.27        | 49.54      |
| SC357  | South Carolina | 302        | [(Whately yellow * Tennessee Redcob) Young]                    | 61.48   | 15.03   | 0.24       | 48.56     | 67.97    | 38.66    | 0.59        | 28.77      |
| SC55   | South Carolina | 302        | [(L501*L503)*(L548*L569)]                                      | 61.76   | 11.67   | 0.19       | 51.16     | 73.04    | 36.15    | 0.49        | 38.03      |
| SD40   | South Dakota   | 302        | Pioneer hybrid 3709                                            | 64.00   | 9.58    | 0.15       | 55.04     | 71.69    | 21.67    | 0.31        | 49.34      |
| SD44   | South Dakota   | 302        | SDp309*SD30                                                    | 62.06   | 7.36    | 0.12       | 54.43     | 72.75    | 21.35    | 0.29        | 51.09      |
| Sg1533 | Indiana        | 302        | Super gold                                                     | 52.23   | 7.86    | 0.17       | 43.32     | 64.42    | 24.92    | 0.41        | 36.39      |
| SG18   | Indiana        | 302        | Super gold                                                     | 51.28   | 7.47    | 0.16       | 42.54     | 68.10    | 20.82    | 0.32        | 45.17      |
| T232   | Tennessee      | 302        | Jellicorse*Teko yellow                                         | 63.07   | 11.42   | 0.18       | 52.77     | 76.34    | 44.39    | 0.57        | 35.07      |
| T234   | Tennessee      | 302        | [T111*RB.L*III.A)]T111(4)                                      | 59.80   | 13.36   | 0.22       | 47.85     | 72.66    | 34.61    | 0.47        | 38.90      |
| T8     | Tennessee      | 302        | Jarvis Golden Prolific                                         | 61.60   | 24.32   | 0.38       | 42.35     | 69.86    | 46.28    | 0.67        | 24.43      |
| Tx303  | Texas          | 302        | Yellow Surecopper                                              | 65.09   | 6.58    | 0.10       | 58.29     | 75.85    | 19.23    | 0.25        | 57.28      |
| Tx601  | Texas          | 302        | Yellow Tuxpan                                                  | 61.01   | 17.53   | 0.28       | 46.34     | 71.22    | 45.18    | 0.64        | 27.31      |
| Tzi10  | Nigeria        | 302        | Tlaltizapan 7844 x TZSR                                        | 54.31   | 10.26   | 0.21       | 43.95     | 68.29    | 36.56    | 0.55        | 31.12      |
| Tzi11  | Nigeria        | 302        | Mo17 x RppSR                                                   | 64.40   | 6.22    | 0.09       | 57.78     | 72.17    | 28.76    | 0.40        | 43.54      |
| Tzi16  | Nigeria        | 302        | PI 540747 = N28/RPPTZSR-Y                                      | 59.69   | 7.18    | 0.12       | 51.96     | 70.55    | 27.47    | 0.39        | 42.50      |
| Tzi18  | Nigeria        | 302        | Sete Lagoas 7728 x TZSR                                        | 60.51   | 7.52    | 0.13       | 52.62     | 69.97    | 20.53    | 0.30        | 48.01      |
| Tzi25  | Nigeria        | 302        | [(B73*RPPSR-TZ)*B73(2)]                                        | 64.17   | 15.66   | 0.24       | 51.07     | 71.41    | 45.72    | 0.65        | 27.06      |
| Tzi8   | Nigeria        | 302        | TZB x TZSR                                                     | 65.70   | 2.39    | 0.04       | 63.11     | 74.74    | 5.76     | 0.08        | 68.88      |
| Tzi9   | Nigeria        | 302        | SIDS7734/TZSR                                                  | 65.49   | 14.04   | 0.20       | 53.64     | 73.21    | 33.80    | 0.46        | 40.39      |
| U267Y  | South Africa   | 302        | WF9r*Mex.155*3                                                 | 58.09   | 5.57    | 0.10       | 51.30     | 76.00    | 17.50    | 0.23        | 59.07      |
| Va102  | Virginia       | 302        | Va59*Va60                                                      | 57.44   | 7.03    | 0.13       | 49.60     | 72.08    | 26.04    | 0.37        | 45.90      |
| Va14   | Virginia       | 302        | [(VaCBS selection*Va17)Va17]                                   | 59.78   | 15.51   | 0.26       | 46.37     | 71.29    | 41.64    | 0.59        | 30.61      |
| Va17   | Virginia       | 302        | Wf9*T8                                                         | 67.27   | 16.42   | 0.23       | 53.97     | 82.24    | 49.53    | 0.56        | 38.51      |
| Va22   | Virginia       | 302        | Va17*C103 backcross                                            | 58.19   | 21.26   | 0.37       | 40.70     | 72.74    | 46.71    | 0.64        | 28.00      |
| Va26   | Virginia       | 302        | Ob43*K155                                                      | 55.62   | 7.27    | 0.14       | 47.44     | 75.55    | 20.61    | 0.27        | 55.61      |
| Va35   | Virginia       | 302        | [(C103*T8)T8]                                                  | 61.41   | 18.62   | 0.29       | 46.03     | 72.50    | 41.19    | 0.57        | 32.69      |
| Va59   | Virginia       | 302        | [(C103*T8(2))*(K4*C103(2))]                                    | 64.26   | 9.98    | 0.15       | 55.06     | 73.68    | 33.11    | 0.45        | 41.67      |

| Inbred | State/Country | Panel Type | Pedigree                                  | WT_CCMI | MT_CCMI | Ratio_CCMI | Diff_CCMI | WT_CCMII | MT_CCMII | Ratio_CCMII | Diff_CCMII |
|--------|---------------|------------|-------------------------------------------|---------|---------|------------|-----------|----------|----------|-------------|------------|
| Va85   | Virginia      | 302        | Virginia Long Ear Synthetic               | 54.30   | 7.97    | 0.16       | 45.51     | 67.81    | 23.53    | 0.36        | 42.31      |
| Va99   | Virginia      | 302        | Oh07B*Pa91                                | 63.49   | 8.10    | 0.13       | 55.49     | 76.12    | 31.44    | 0.40        | 46.55      |
| VaW6   | Virginia      | 302        | unknown                                   | 63.00   | 2.74    | 0.05       | 58.61     | 75.66    | 9.06     | 0.12        | 66.28      |
| W117HT | Wisconsin     | 302        | W117=643*Minnesota No.13                  | 57.68   | 8.94    | 0.16       | 48.55     | 77.54    | 32.83    | 0.41        | 47.23      |
| W153R  | Wisconsin     | 302        | [(Ia153*W8)Ia153]                         | 65.49   | 16.23   | 0.23       | 52.14     | 73.54    | 53.63    | 0.72        | 22.80      |
| W182B  | Wisconsin     | 302        | WD*W22                                    | 55.18   | 9.12    | 0.18       | 45.69     | 70.58    | 27.21    | 0.39        | 42.77      |
| W22    | Wisconsin     | 302        | III.B10*W25                               | 59.82   | 7.78    | 0.13       | 52.00     | 75.36    | 31.99    | 0.42        | 43.54      |
| W401   | Wisconsin     | 302        | [(33*Wisconsin No.25)*67C]                | 63.81   | 16.10   | 0.24       | 50.39     | 75.81    | 50.00    | 0.64        | 29.24      |
| W64A   | Wisconsin     | 302        | Wf9*Cl.187-2                              | 59.77   | 8.66    | 0.15       | 51.04     | 73.94    | 24.68    | 0.33        | 49.70      |
| Wf9    | Indiana       | 302        | Reid yellow dent (Indiana station strain) | 61.20   | 7.66    | 0.13       | 53.28     | 75.95    | 22.09    | 0.29        | 54.83      |



Table S5. The summary of the HapMap3 variants before and after filtering to remove SNPs with minor allele frequency < 0.05 (5%) and missing > 0.1 (10%).

| Chromosome   | Sites_before_filtering | Sites_after_filtering |
|--------------|------------------------|-----------------------|
| 1            | 12550106               | 2900472               |
| 2            | 9620462                | 2247603               |
| 3            | 9415581                | 2208140               |
| 4            | 9862608                | 2146099               |
| 5            | 8226794                | 1855240               |
| 6            | 6502278                | 1430027               |
| 7            | 6902443                | 1632102               |
| 8            | 6619311                | 1510768               |
| 9            | 6112165                | 1528972               |
| 10           | 5875644                | 1327869               |
| <b>Total</b> | <b>81687392</b>        | <b>18787292</b>       |

Table S6. The chlorophyll accumulation in the third fully-expanded leaf at the V3 stage of greenhouse-grown maize seedlings.

| Genotype                                    | CCM<br>(Index)           | Chlorophyll <i>a</i><br>(mg/g FW) | Chlorophyll <i>b</i><br>(mg/g FW) | Total Chlorophyll<br>(mg/g FW) | Chl <i>a/b</i> ratio   | Total Carotenoids<br>(mg/g FW) |
|---------------------------------------------|--------------------------|-----------------------------------|-----------------------------------|--------------------------------|------------------------|--------------------------------|
| Mo17/B73                                    | 27.04±2.11 <sup>a</sup>  | 1.48±0.10 <sup>a</sup>            | 0.42±0.026 <sup>a</sup>           | 1.90±0.12 <sup>a</sup>         | 3.50±0.05 <sup>d</sup> | 0.20±0.011 <sup>a</sup>        |
| <i>Oy1-NI989/oy1:Mo17/B73</i>               | 5.74±0.11 <sup>c</sup>   | 0.38±0.02 <sup>d</sup>            | 0.07±0.005 <sup>d</sup>           | 0.45±0.02 <sup>d</sup>         | 5.48±0.16 <sup>b</sup> | 0.04±0.002 <sup>e</sup>        |
| B73/Mo17                                    | 22.86±0.29 <sup>b</sup>  | 1.15±0.04 <sup>b</sup>            | 0.32±0.015 <sup>b</sup>           | 1.47±0.05 <sup>b</sup>         | 3.57±0.10 <sup>d</sup> | 0.16±0.004 <sup>b</sup>        |
| <i>Oy1-NI989/oy1:B73/Mo17</i>               | 4.35±0.22 <sup>c</sup>   | 0.36±0.03 <sup>d</sup>            | 0.06±0.008 <sup>d</sup>           | 0.42±0.04 <sup>d</sup>         | 6.03±0.25 <sup>a</sup> | 0.05±0.002 <sup>de</sup>       |
| B73                                         | 25.19±1.12 <sup>ab</sup> | 1.13±0.03 <sup>b</sup>            | 0.32±0.008 <sup>b</sup>           | 1.47±0.04 <sup>b</sup>         | 3.54±0.03 <sup>d</sup> | 0.16±0.003 <sup>bc</sup>       |
| Mo17                                        | 16.18±0.97 <sup>c</sup>  | 0.98±0.03 <sup>b</sup>            | 0.29±0.008 <sup>b</sup>           | 1.27±0.04 <sup>b</sup>         | 3.44±0.03 <sup>d</sup> | 0.14±0.001 <sup>c</sup>        |
| <i>Oy1-NI989/oy1:B73</i>                    | 10.18±0.42 <sup>d</sup>  | 0.57±0.03 <sup>c</sup>            | 0.13±0.008 <sup>c</sup>           | 0.70±0.03 <sup>c</sup>         | 4.40±0.07 <sup>c</sup> | 0.06±0.003 <sup>d</sup>        |
| <i>Oy1-NI989/Oy1-NI989</i> <sup>&amp;</sup> | 1.00±0.00 <sup>f</sup>   | n.d                               | n.d                               | -                              | -                      | 0.01±0.001 <sup>f</sup>        |

Data are presented as means ± standard deviation. Each values is a mean of three biological replicates except for Mo17 with two replications. The connecting letter report between data within each trait indicates statistical significance determined using ANOVA with post-hoc analysis to compare means between genotypes using Tukey's HSD at p<0.05. CCM meter reads a value of 1.00 for blank.

<sup>&</sup>Homozygote seedlings were obtained in B73 background and the measurements were performed on first leaf of 10 days old seedlings, n=5.

Table S7. Means and standard deviation of pigment absorbance (index) from mutant (*OyI-N1989/oyI*) and wild-type plants grown at the Purdue Agronomy Farm.

| Genotype                      | CCMI                  | CCMII                 |
|-------------------------------|-----------------------|-----------------------|
| B73                           | 57.3±8.0 <sup>a</sup> | 67.0±5.2 <sup>a</sup> |
| Mo17/B73                      | 57.8±7.3 <sup>a</sup> | 76.4±5.6 <sup>b</sup> |
| <i>OyI-1989/oyI</i> :B73      | 6.8±1.3 <sup>b</sup>  | 27.7±3.2 <sup>c</sup> |
| <i>OyI-1989/oyI</i> :Mo17/B73 | 2.3±0.5 <sup>c</sup>  | 9.8±1.7 <sup>d</sup>  |

The connecting letter report indicates statistical significance determined using ANOVA followed by mean comparisons between the genotypes using Tukey's HSD at  $p < 0.01$ . Check materials and methods for trait descriptions.

Table S8. The trait correlations among the CCM traits in IBM x *Oy1-N1989/oy1*:B73 F<sub>1</sub> hybrid populations.

|              | WT CCM I | MT CCM I | Ratio CCM I | Diff CCM I | WT CCM II | MT CCM II | Ratio CCM II | Diff CCM II |
|--------------|----------|----------|-------------|------------|-----------|-----------|--------------|-------------|
| WT_CCM I     |          | 0.069    | -0.222      | 0.901      | 0.368     | 0.062     | -0.045       | 0.235       |
| MT_CCM I     | 0.312    |          | 0.948       | -0.371     | 0.059     | 0.875     | 0.859        | -0.616      |
| Ratio_CCM I  | 0.001    | <.0001   |             | -0.619     | -0.062    | 0.829     | 0.855        | -0.673      |
| Diff_CCM I   | <.0001   | <.0001   | <.0001      |            | 0.317     | -0.323    | -0.416       | 0.487       |
| WT_CCM II    | <.0001   | 0.39     | 0.363       | <.0001     |           | 0.136     | -0.156       | 0.664       |
| MT_CCM II    | 0.361    | <.0001   | <.0001      | <.0001     | 0.046     |           | 0.947        | -0.651      |
| Ratio_CCM II | 0.513    | <.0001   | <.0001      | <.0001     | 0.021     | <.0001    |              | -0.835      |
| Diff_CCM II  | 0.001    | <.0001   | <.0001      | <.0001     | <.0001    | <.0001    | <.0001       |             |

The upper half contains Pearson's correlation coefficient and the lower half contains correlation p-values for each pairwise trait comparison. Self-comparisons (diagonal) are left blank.

Table S9. The trait Correlations among the CCM traits in Syn10 x *Oy1-NI989/oy1*:B73 F<sub>1</sub> hybrid populations.

|              | WT_CCM I | MT_CCM I | Ratio_CCM I | Diff_CCM I | WT_CCM II | MT_CCM II | Ratio_CCM II | Diff_CCM II |
|--------------|----------|----------|-------------|------------|-----------|-----------|--------------|-------------|
| WT_CCM I     |          | 0.107    | -0.118      | 0.899      | 0.367     | 0.156     | 0.077        | 0.032       |
| MT_CCM I     | 0.0926   |          | 0.965       | -0.340     | -0.035    | 0.889     | 0.910        | -0.852      |
| Ratio_CCM I  | 0.0628   | <.0001   |             | -0.537     | -0.084    | 0.858     | 0.887        | -0.846      |
| Diff_CCM I   | <.0001   | <.0001   | <.0001      |            | 0.365     | -0.244    | -0.329       | 0.406       |
| WT_CCM II    | <.0001   | 0.583    | 0.185       | <.0001     |           | 0.125     | -0.124       | 0.370       |
| MT_CCM II    | 0.014    | <.0001   | <.0001      | <.0001     | 0.049     |           | 0.960        | -0.876      |
| Ratio_CCM II | 0.228    | <.0001   | <.0001      | <.0001     | 0.05      | <.0001    |              | -0.960      |
| Diff_CCM II  | 0.613    | <.0001   | <.0001      | <.0001     | <.0001    | <.0001    | <.0001       |             |

The upper half contains Pearson's correlation coefficient and the lower half contains correlation p-values for each pairwise trait comparison. Self-comparisons (diagonal) are left blank.

Table S10. The summary of the QTL detected for CCM traits in IBM x *OyI-N1989/oyI*:B73 F<sub>1</sub> hybrid populations.

| Trait Identifier | QTL <sup>a</sup> | Chr <sup>b</sup> | LOD <sup>c</sup> | Position <sup>d</sup> | Left Marker | Right Marker | LOD-2 Interval <sup>e</sup> |       | PVE <sup>f</sup> | Mean±SE <sup>g</sup> |             | Greater Allele |
|------------------|------------------|------------------|------------------|-----------------------|-------------|--------------|-----------------------------|-------|------------------|----------------------|-------------|----------------|
|                  |                  |                  |                  |                       |             |              | Left                        | Right |                  | B73                  | Mo17        |                |
| MT_CCMI          | 1                | 10               | 46.9             | 139                   | AI795367    | AY109994     | 137                         | 141   | 53.68            | 8.81±0.188           | 4.16±0.226  | B73            |
| WT_CCMI          | 1                | 1                | 3.6              | 523                   | bnl5.59a    | php20654     | 519                         | 534   | 7.12             | 47.27±0.548          | 43.51±0.734 | B73            |
| MT_CCMII         | 1                | 10               | 45.0             | 139                   | AI795367    | AY109994     | 128                         | 141   | 51.48            | 18.27±0.448          | 7.38±0.585  | B73            |
| WT_CCMII         | 0                |                  |                  |                       |             |              |                             |       |                  |                      |             |                |
| Ratio_CCMI       | 1                | 10               | 39.7             | 139                   | AI795367    | AY109994     | 137                         | 145   | 50.19            | 0.19±0.004           | 0.09±0.005  | B73            |
| Ratio_CCMII      | 1                | 10               | 44.4             | 139                   | AI795367    | AY109994     | 137                         | 142   | 55.38            | 0.36±0.009           | 0.14±0.01   | B73            |
| Diff_CCMI        | 1                | 10               | 6.6              | 145                   | phi059      | isu85b       | 126                         | 153   | 13.18            | 36.89±0.576          | 42.24±0.724 | B73            |
| Diff_CCMII       | 1                | 10               | 22.4             | 138                   | AI795367    | AY109994     | 129                         | 142   | 36.80            | 32.95±0.687          | 44.77±0.912 | B73            |

<sup>a</sup>Number of QTL detected for a given trait

<sup>b</sup>Chromosome location of a QTL

<sup>c</sup>LOD score at the peak of a given QTL

<sup>d</sup>Peak position and <sup>e</sup>LOD-2 interval of the QTL in terms of genetic position in centiMorgan(cM)

<sup>f</sup>PVE is percent of variance explained by the QTL at this position as estimated by regression and reported as an R<sup>2</sup> value\*100

<sup>g</sup>Mean and standard error of the trait with B73 and Mo17 genotype at the peak marker of the detected QTL

Table S11. The summary of the QTL detected from CCM traits in Syn10 x *Oy1-N1989/oy1*:B73 F<sub>1</sub> hybrid populations.

| Trait        | QTL <sup>a</sup> | Chr <sup>b</sup> | LOD <sup>c</sup> | Position <sup>d</sup> | Left Marker | Right Marker | LOD-2 Interval <sup>e</sup> |       | PVE <sup>f</sup> | Mean±SE <sup>g</sup> |             | Greater allele |
|--------------|------------------|------------------|------------------|-----------------------|-------------|--------------|-----------------------------|-------|------------------|----------------------|-------------|----------------|
|              |                  |                  |                  |                       |             |              | Left                        | Right |                  | B73                  | Mo17        |                |
| MT_CCM I     | 1                | 10               | 59.9             | 189                   | chr10.90.5  | chr10.93     | 189                         | 193   | 65.2             | 7.00±0.117           | 2.65±0.174  | B73            |
| WT_CCM I     | 0                |                  |                  |                       |             |              |                             |       |                  |                      |             |                |
| Ratio_CCM I  | 1                | 10               | 54.0             | 189                   | chr10.90.5  | chr10.93     | 189                         | 192   | 62.1             | 0.14±0.002           | 0.05±0.003  | B73            |
| Diff_CCM I   | 0                |                  |                  |                       |             |              |                             |       |                  |                      |             |                |
| MT_CCM II    | 1                | 10               | 83.6             | 192                   | chr10.94.5  | chr10.95.5   | 190                         | 193   | 66.5             | 29.07±0.478          | 8.39±0.731  | B73            |
| WT_CCM II    | 0                |                  |                  |                       |             |              |                             |       |                  |                      |             |                |
| Ratio_CCM II | 1                | 10               | 78.1             | 192                   | chr10.94.5  | chr10.95.5   | 190                         | 193   | 66.9             | 0.40±0.006           | 0.11±0.010  | B73            |
| Diff_CCM II  | 1                | 10               | 52.1             | 189                   | chr10.90.5  | chr10.93     | 189                         | 191   | 60.3             | 42.46±0.623          | 63.39±0.926 | B73            |

<sup>a</sup>Number of QTL detected for a given trait

<sup>b</sup>Chromosome location of a QTL

<sup>c</sup>LOD score at the peak of a given QTL

<sup>d</sup>Peak position and <sup>e</sup>LOD-2 interval of the QTL in terms of genetic position in centiMorgan(cM)

<sup>f</sup>PVE is percent of variance explained by the QTL at this position as estimated by regression and reported as an R<sup>2</sup> value\*100

<sup>g</sup>Mean and standard error of the trait with B73 and Mo17 genotype at the peak marker of the detected QTL

Table S12. Recombinants within the *veyl* region derived from Syn10 x *Oy1-NI989/oy1*:B73 F<sub>1</sub> populations.

| Line ID | MT_CCMI | Ratio_CCMI | MT_CCMII | Ratio_CCMII | chr10.90.5 | chr10.93 | chr10.94.5 | chr10.95.5 | Category <sup>1</sup> |
|---------|---------|------------|----------|-------------|------------|----------|------------|------------|-----------------------|
| IBM_31  | 7.0     | 0.13       | 33.2     | 0.46        | B          | A        | A          | A          | Suppressed            |
| IBM_41  | 2.3     | 0.05       | 7.0      | 0.10        | B          | B        | A          | A          | Enhanced              |
| IBM_149 | 1.7     | 0.03       | 5.7      | 0.09        | B          | B        | B          | A          | Enhanced              |
| IBM_144 | 1.7     | 0.03       | 5.6      | 0.07        | B          | B        | B          | A          | Enhanced              |
| IBM_199 | 8.9     | 0.20       | 30.1     | 0.41        | A          | A        | A          | B          | Suppressed            |
| IBM_201 | 8.5     | 0.15       | 32.0     | 0.40        | A          | A        | A          | B          | Suppressed            |
| IBM_214 | 1.8     | 0.03       | 5.5      | 0.07        | B          | B        | B          | A          | Enhanced              |
| IBM_217 | 2.4     | 0.04       | 7.3      | 0.10        | B          | B        | B          | A          | Enhanced              |
| IBM_229 | 9.7     | 0.17       | 34.8     | 0.49        | B          | A        | A          | A          | Suppressed            |

The genotype code 'A' and 'B' for each marker denote B73 and Mo17 genotype, respectively.

<sup>1</sup>Severity of the mutation. Check the respective CCM trait value for quantitative assessment of severity.



Table S13. The trait correlations of various CCM traits using mean values of MDL x *Oy1-N1989/oy1:B73* F<sub>1</sub> hybrid populations.

|             | WT CCMI | MT CCMI | Ratio CCMI | Diff CCMI | WT CCMII | MT CCMII | Ratio CCMII | Diff CCMII |
|-------------|---------|---------|------------|-----------|----------|----------|-------------|------------|
| WT_CCMI     |         | 0.182   | -0.047     | 0.825     | 0.329    | 0.178    | 0.124       | 0.007      |
| MT_CCMI     | 0.001   |         | 0.964      | -0.405    | 0.135    | 0.861    | 0.846       | -0.750     |
| Ratio_CCMI  | 0.410   | <.0001  |            | -0.596    | 0.080    | 0.823    | 0.818       | -0.746     |
| Diff_CCMI   | <.0001  | <.0001  | <.0001     |           | 0.231    | -0.329   | -0.372      | 0.438      |
| WT_CCMII    | <.0001  | 0.012   | 0.142      | <.0001    |          | 0.171    | -0.028      | 0.351      |
| MT_CCMII    | 0.002   | <.0001  | <.0001     | <.0001    | 0.002    |          | 0.976       | -0.862     |
| Ratio_CCMII | 0.030   | <.0001  | <.0001     | <.0001    | 0.601    | <.0001   |             | -0.942     |
| Diff_CCMII  | 0.904   | <.0001  | <.0001     | <.0001    | <.0001   | <.0001   | <.0001      |            |

The upper half contains Pearson's correlation coefficient and the lower half contains correlation p-values for each pairwise trait comparison. Self-comparisons (diagonal) are left blank.

Table S14. The broad sense heritability and variance estimates of CCM traits measured in MDL x *Oy1-N1989/oy1:B73* F<sub>1</sub> hybrid populations.

| Trait        | Heritability | LSD   | Variance |
|--------------|--------------|-------|----------|
| WT_CCM I     | 0.59         | 14.56 | 80.64    |
| MT_CCM I     | 0.95         | 3.22  | 18.77    |
| Ratio_CCM I  | 0.92         | 0.06  | 0.01     |
| Diff_CCM I   | 0.65         | 14.53 | 88.81    |
| WT_CCM II    | 0.63         | 11.74 | 57.20    |
| MT_CCM II    | 0.96         | 7.36  | 126.66   |
| Ratio_CCM II | 0.94         | 0.12  | 0.02     |
| Diff_CCM II  | 0.87         | 13.37 | 169.53   |

Table S15. The summary of the top four statistically significant SNP markers associated with CCM traits by GWAS and top SNP following the addition of S10\_9161643 as a covariate for each trait.

| Trait                                           | SNP <sup>1</sup> | P-value  | MAF <sup>2</sup> | PVE <sup>3</sup> | FDR <sup>4</sup> |
|-------------------------------------------------|------------------|----------|------------------|------------------|------------------|
| MT_CCMI                                         | S10_9161643      | 2.12E-10 | 0.49             | 11.38            | 0.000281683      |
|                                                 | S10_8785697      | 1.70E-09 | 0.46             | 10.16            | 0.001131981      |
|                                                 | S10_8994665      | 1.29E-08 | 0.36             | 9.00             | 0.002713112      |
|                                                 | S10_8937688      | 1.41E-08 | 0.38             | 8.95             | 0.002713112      |
|                                                 | S10_9179932      | 2.04E-08 | 0.08             | 8.73             | 0.002713112      |
| MT_CCMI with S10_9161643 covariate              | S10_9179932      | 6.58E-08 | 0.08             | 6.82             | 0.063            |
| Ratio_CCMI                                      | S10_9161643      | 5.43E-09 | 0.49             | 9.93             | 0.003601250      |
|                                                 | S10_9326761      | 6.87E-09 | 0.10             | 9.79             | 0.003601250      |
|                                                 | S10_9327646      | 9.04E-09 | 0.11             | 9.62             | 0.003601250      |
|                                                 | S10_9179932      | 1.08E-08 | 0.08             | 9.51             | 0.003601250      |
| Ratio_CCMI covariate with S10_9161643 covariate | S10_9179932      | 5.16E-08 | 0.08             | 7.57             | 0.043            |
| MT_CCMII                                        | S10_9161643      | 1.61E-15 | 0.49             | 18.41            | 0.000000002      |
|                                                 | S10_8937688      | 6.76E-12 | 0.38             | 13.27            | 0.000004489      |
|                                                 | S10_9047937      | 1.33E-11 | 0.38             | 12.86            | 0.000004524      |
|                                                 | S10_9104770      | 1.36E-11 | 0.36             | 12.85            | 0.000004524      |
|                                                 | S10_9179932      | 2.16E-08 | 0.08             | 8.59             | 0.000073403      |
| MT_CCMII covariate with S10_9161643 covariate   | S10_9179932      | 3.60E-09 | 0.08             | 7.29             | 0.005            |
| Ratio_CCMII                                     | S10_9161643      | 1.98E-14 | 0.49             | 16.82            | 0.000000026      |
|                                                 | S10_8937688      | 1.42E-12 | 0.38             | 14.20            | 0.000000653      |
|                                                 | S10_9001249      | 1.63E-12 | 0.34             | 14.12            | 0.000000653      |
|                                                 | S10_8996692      | 3.78E-12 | 0.33             | 13.61            | 0.000000653      |
|                                                 | S10_9179932      | 1.24E-08 | 0.08             | 8.90             | 0.000034587      |

| Trait                                            | SNP <sup>1</sup> | P-value  | MAF <sup>2</sup> | PVE <sup>3</sup> | FDR <sup>4</sup> |
|--------------------------------------------------|------------------|----------|------------------|------------------|------------------|
| Ratio_CCMII covariate with S10_9161643 covariate | S10_9179932      | 2.39E-09 | 0.08             | 7.64             | 0.003            |

Except for Ratio\_CCMII trait, the S10\_9179932 marker was not among the top four SNP associations in no covariate model and is thus provided for comparison with the covariate model. <sup>1</sup>SNP markers associated with the respective traits. S10 denotes SNP markers on chromosome 10 followed by the physical position of the markers from the B73 v4 assembly; <sup>2</sup>Minor allele frequency (MAF) of the SNP marker; <sup>3</sup>Phenotypic variance explained (PVE) by the SNP marker; <sup>4</sup>Chromosome-wide FDR adjusted P-value.

Table S16. Haplotypes at two SNPs at *vey1* locus associated with *Oy1-N1989* suppression and its effect on CCM traits in MDL x *Oy1-N1989/oy1:B73* F<sub>1</sub> populations.

| Haplotype <sup>&amp;</sup> | Sample (n) | WT_CCMI                  | MT_CCMI                 | Ratio_CCMI             | WT_CCMII   | MT_CCMII                | Ratio_CCMII            |
|----------------------------|------------|--------------------------|-------------------------|------------------------|------------|-------------------------|------------------------|
| AG                         | 153        | 60.86±3.69 <sup>a</sup>  | 10.00±4.13 <sup>a</sup> | 0.16±0.06 <sup>a</sup> | 72.57±3.45 | 30.99±9.19 <sup>a</sup> | 0.43±0.12 <sup>a</sup> |
| CG                         | 121        | 59.00±4.21 <sup>b</sup>  | 7.65±2.42 <sup>b</sup>  | 0.13±0.04 <sup>b</sup> | 72.04±3.97 | 22.65±6.69 <sup>b</sup> | 0.32±0.09 <sup>b</sup> |
| AA                         | 8          | 58.56±2.43 <sup>ab</sup> | 3.93±1.17 <sup>c</sup>  | 0.07±0.02 <sup>c</sup> | 73.78±3.74 | 15.28±4.90 <sup>c</sup> | 0.21±0.07 <sup>c</sup> |
| CA                         | 23         | 60.53±4.45 <sup>ab</sup> | 2.78±0.99 <sup>c</sup>  | 0.05±0.02 <sup>c</sup> | 72.99±3.08 | 10.63±2.82 <sup>c</sup> | 0.15±0.03 <sup>c</sup> |

<sup>&</sup>The first nucleotide of the haplotype denotes variant (A/C) at SNP S10\_9161643 and the second nucleotide of the haplotype denotes variant (G/A) at SNP S10\_9179932. The physical positions of these SNPs are from the B73 v4 assembly.

Table S17. The chlorophyll quantification of plants segregating for the allelic interaction between *Oyl-N1989* and *oyl-yg* alleles at *oyl*.

| Cross                                                    | Days after planting | <i>Oyl-N1989/oyl-yg</i> | <i>Oyl-N1989/+</i>    | <i>oyl-yg/+</i>       | <i>oyl-yg/oyl-yg</i> |
|----------------------------------------------------------|---------------------|-------------------------|-----------------------|-----------------------|----------------------|
| (Mo17 x <i>oyl-yg/oyl-yg</i> ) x <i>Oyl-N1989/+</i> :B73 | 21                  | 1.7±0.4 <sup>a</sup>    | 3.0±0.6 <sup>a</sup>  | .                     | .                    |
| (B73 x <i>oyl-yg/oyl-yg</i> ) x <i>Oyl-N1989/+</i> :B73  | 21                  | 2.9±0.5 <sup>b</sup>    | 5.1±0.8 <sup>b</sup>  | .                     | .                    |
| (Mo17 x <i>oyl-yg/oyl-yg</i> ) x <i>Oyl-N1989/+</i> :B73 | 40                  | 3.7±0.6 <sup>c</sup>    | 7.0±0.3 <sup>c</sup>  | .                     | .                    |
| (B73 x <i>oyl-yg/oyl-yg</i> ) x <i>Oyl-N1989/+</i> :B73  | 40                  | 7.5±0.9 <sup>d</sup>    | 17.1±3.3 <sup>d</sup> | .                     | .                    |
| (Mo17 x <i>oyl-yg/oyl-yg</i> ) x <i>oyl-yg/oyl-yg</i>    | 21                  | .                       | .                     | 27.6±5.7 <sup>a</sup> | 7.6±2.8 <sup>a</sup> |
| (B73 x <i>oyl-yg/oyl-yg</i> ) x <i>oyl-yg/oyl-yg</i>     | 21                  | .                       | .                     | 27.8±6.8 <sup>a</sup> | 8.1±2.8 <sup>a</sup> |
| (Mo17 x <i>oyl-yg/oyl-yg</i> ) x <i>oyl-yg/oyl-yg</i>    | 40                  | .                       | .                     | 32.2±4.9 <sup>b</sup> | 16.7±5 <sup>b</sup>  |
| (B73 x <i>oyl-yg/oyl-yg</i> ) x <i>oyl-yg/oyl-yg</i>     | 40                  | .                       | .                     | 38.7±6.1 <sup>b</sup> | 21±6.2 <sup>b</sup>  |

Data are presented as means and standard deviations. The sample size in each category varies from 5-20 plants. Comparisons to declare statistical significance were done only between the crosses with B73 and Mo17 as a parent within each genotype class of the progenies quantified on the same day (i.e. within 21 or 40 days after planting). The connecting letter report between the two samples indicates the statistical significance at  $p < 0.05$  using student's t-test.

Table S18. The summary of the average CCM value of the F<sub>1</sub> hybrids of inbred lines crossed with *Oy1-N1989/oy1:B73*, and allelic state at the 6 bp (two amino acids) indel in the coding sequence of OY1 transcript in the respective parental inbred line.

| Inbred                                        | Insertion <sup>a</sup> | MT CCM I     | WT CCM I       | Ratio CCM I  | MT CCM II    | WT CCM II    | Ratio CCM II  | Category <sup>b</sup> |
|-----------------------------------------------|------------------------|--------------|----------------|--------------|--------------|--------------|---------------|-----------------------|
| NC350                                         | AT                     | 12.7         | 68.1           | 0.19         | 36.2         | 76.6         | 0.48          | sup                   |
| NC358                                         | AT                     | 12.6         | 53.3           | 0.24         | 36.9         | 70.3         | 0.54          | sup                   |
| CML69                                         | AT                     | 9.9          | 71.0           | 0.14         | 27.5         | 69.9         | 0.39          | sup                   |
| B97                                           | AS                     | 9.9          | 59.7           | 0.17         | 31.5         | 76.9         | 0.41          | sup                   |
| Mo18W                                         | AS                     | 9.1          | 68.1           | 0.13         | 24.4         | 75.2         | 0.33          | sup                   |
| Oh43                                          | AS                     | 8.7          | 58.4           | 0.15         | 24.3         | 57.9         | 0.42          | sup                   |
| W22                                           | AT                     | 8.5          | 64.4           | 0.13         | 37.8         | 74.6         | 0.51          | sup                   |
| IL14H                                         | AT                     | 7.7          | 50.3           | 0.15         | 22.5         | 68.8         | 0.33          | sup                   |
| B73                                           | -                      | 7.0          | 57.2           | 0.12         | 26.3         | 69.4         | 0.38          | sup                   |
| MS71                                          | AS                     | 6.9          | 60.3           | 0.11         | 12.9         | 71.1         | 0.18          | sup                   |
| P39                                           | AT                     | 6.5          | 41.6           | 0.16         | 16.9         | 64.7         | 0.26          | sup                   |
| Oh7b                                          | AS                     | 6.5          | 54.2           | 0.12         | 24.6         | 70.4         | 0.35          | sup                   |
| CML103                                        | -                      | 6.3          | 55.1           | 0.12         | 17.6         | 75.6         | 0.23          | sup                   |
| CML322                                        | -                      | 4.6          | 61.9           | 0.07         | 21.1         | 72.4         | 0.29          | enh                   |
| Ki3                                           | AT                     | 4.0          | 59.5           | 0.07         | 19.9         | 70.2         | 0.28          | enh                   |
| CML247                                        | AT                     | 3.1          | 70.6           | 0.04         | 14.1         | 79.1         | 0.18          | enh                   |
| Tzi8                                          | AT                     | 2.4          | 71.0           | 0.03         | 5.4          | 78.8         | 0.07          | enh                   |
| Mo17                                          | AS                     | 2.0          | 53.7           | 0.04         | 9.6          | 76.5         | 0.13          | enh                   |
| <b>Linear Fit (R<sup>2</sup>)<sup>c</sup></b> |                        | <b>0.009</b> | <b>0.00003</b> | <b>0.005</b> | <b>0.002</b> | <b>0.008</b> | <b>0.0009</b> |                       |
| <b>P-value<sup>d</sup></b>                    |                        | <b>0.49</b>  | <b>0.66</b>    | <b>0.56</b>  | <b>0.56</b>  | <b>0.87</b>  | <b>0.64</b>   |                       |

Data were derived from three replications planted in a RCBD.

<sup>a</sup>Coding sequence polymorphism in the third exon of OY1 protein with three alternate alleles. Abbreviated symbols are A:Alanine, T:Threonine, S:Serine, -:Deletion of both amino acids.

<sup>b</sup>Category of the genotypes in terms of the severity of *Oy1-N1989/oy1:B73*/inbred F<sub>1</sub> mutant individuals assigned based on CCM I and Ratio\_CCM I trait value. Abbreviated symbols are sup:suppressed mutants, enh:enhanced/severe mutants.

<sup>c</sup>R<sup>2</sup> of the linear regression model using Indel polymorphism as an explanatory variable onto a given trait as a response variable.

<sup>d</sup>P-value of the analysis of variance for effect of Indel polymorphism on the respective trait value.

Table S19. The linear regression of the top *vey1* linked marker (isu085b) and CCM traits from wild-type and mutant siblings of IBM x *Oy1-N1989/oy1*:B73 F<sub>1</sub> populations on to OY1 expression (RPKM values) of the respective IBM line (n=74).

| Trait/Marker | R <sup>2</sup> (%) | P-value |
|--------------|--------------------|---------|
| isu085b      | 19.2               | <0.0001 |
| MT_CCM I     | 25.2               | <0.0001 |
| WT_CCM I     | 4.8                | 0.06    |
| MT_CCM II    | 27.3               | <0.0001 |
| WT_CCM II    | 0.9                | 0.40    |
| Ratio_CCM I  | 31.3               | <0.0001 |
| Ratio_CCM II | 22.5               | <0.0001 |



Table S20. The allele expression bias at *oyl* in leaf tissue from the top fully-expanded leaf at the V3 stage.

| Genotype                             | SNP 252 <sup>1</sup> | SNP252 Ref <sup>2</sup> | SNP 252 Alt <sup>3</sup> | SNP 317 | SNP317 Ref    | SNP317 Alt | Ratio SNP252 <sup>ψ</sup> | Ratio SNP317 <sup>+</sup> | Average <sup>%</sup>   |
|--------------------------------------|----------------------|-------------------------|--------------------------|---------|---------------|------------|---------------------------|---------------------------|------------------------|
| <i>oyl/oyl</i> :B/M <sup>&amp;</sup> | .                    | .                       | .                        | .       | .             | .          | .                         | .                         | 1.19±0.07              |
| <i>oyl/oyl</i> :B/M                  | C/C                  | .                       | .                        | C/T     | 2635±51.60    | 2430±67.28 | .                         | 1.08±0.01 <sup>a</sup>    | 1.08±0.01 <sup>a</sup> |
| <i>Oy1-N1989/oyl</i> :M/B            | C/T                  | 2044±149.77             | 2291±152.87              | C/T     | 2782±120.79   | 2522±67.29 | 1.12±0.01 <sup>a</sup>    | 1.10±0.02 <sup>a</sup>    | 1.11±0.01 <sup>a</sup> |
| <i>Oy1-N1989/oyl</i> :B/M            | C/T                  | 2138±142.51             | 2456±122.46              | C/T     | 2677.33±99.71 | 2425±95.50 | 1.15±0.03 <sup>a</sup>    | 1.10±0.01 <sup>a</sup>    | 1.13±0.02 <sup>a</sup> |
| <i>Oy1-N1989/oyl</i> :B              | C/T                  | 2261±109.33             | 2290±76.62               | C/C     | .             | .          | 1.01±0.02 <sup>b</sup>    | .                         | 1.01±0.02 <sup>b</sup> |

The connecting letter report in all columns indicate statistical significance calculated using ANOVA with post-hoc analysis using Tukey's HSD with  $p < 0.01$ .

<sup>1</sup>SNP position 252 with two alternate alleles. C corresponds to the wild-type/reference allele and T corresponds to the mutant/alternate allele. Same applies to SNP\_317 column, except this SNP is polymorphic only between B73 and Mo17; *Oy1-N1989* allele is monomorphic with B73 at SNP\_317.

<sup>2</sup>Mean ± standard deviation of allele count for the reference allele using three biological replications. Same applies to SNP317\_Ref column. Same applies to SNP317\_Ref column.

<sup>3</sup>Mean ± standard deviation of allele count for the alternate allele using three biological replications. Same applies to SNP317\_Alt column. Same applies to SNP317\_Alt column.

<sup>&</sup>Data obtained from Waters *et al.* 2017. Allele bias at *oyl* locus for plants grown under control condition.

<sup>ψ</sup>Mean ± standard deviation of the ratios of the read count from reference allele to the alternate allele at SNP252.

<sup>+</sup>Mean ± standard deviation of the ratios of the read count from reference allele to the alternate allele at SNP317.

<sup>%</sup>Mean ± standard deviation of the average of the ratios at SNP position 252 and 317.

Table S21. The chlorophyll approximation (using CCM) from the middle of the third leaf at the V3 stage on greenhouse-grown maize seedlings from a cross of B73, Mo17, and PH207 inbred lines (ear-parents) with *Oy1-N1989/oy1*:B73 plants (pollen-parent).

| Pedigree  | Genotype  | Sample size | CCM (Index)             |
|-----------|-----------|-------------|-------------------------|
| B73       | wild-type | 8           | 21.16±2.65 <sup>a</sup> |
| B73       | mutant    | 5           | 7.95±0.45 <sup>b</sup>  |
| PH207/B73 | wild-type | 5           | 28.20±1.57 <sup>c</sup> |
| PH207/B73 | mutant    | 6           | 5.53±0.23 <sup>d</sup>  |
| Mo17/B73  | wild-type | 5           | 15.62±1.83 <sup>e</sup> |
| Mo17/B73  | mutant    | 5           | 3.90±0.12 <sup>d</sup>  |

Data are presented as mean ± standard deviation. The connecting letter report indicates statistical significance calculated using ANOVA with post-hoc analysis using Tukey's HSD with  $p < 0.05$ .

Table S22. The distribution of normalized OY1 expression in the emerging shoot tissue of maize diversity lines (Kremling *et al.* 2018) at two SNPs associated with suppression of *Oy1-N1989* phenotype in MDL x *Oy1-N1989/oy1*:B73 F<sub>1</sub> populations.

| Variant     | Allele/Haplotype | Sample Size | OY1 (count)               | R <sup>2</sup> (%) <sup>a</sup> |
|-------------|------------------|-------------|---------------------------|---------------------------------|
| S10_9161643 | A                | 138         | 3.94 ± 0.24*              | 7.14                            |
|             | C                | 119         | 3.79 ± 0.30               |                                 |
| S10_9179932 | A                | 15          | 3.62 ± 0.20*              | 4.80                            |
|             | G                | 242         | 3.89 ± 0.28               |                                 |
| Haplotypes  | AG               | 132         | 3.95 ± 0.24 <sup>a</sup>  | 11.24                           |
|             | CG               | 110         | 3.81 ± 0.30 <sup>b</sup>  |                                 |
|             | AA               | 6           | 3.68 ± 0.17 <sup>bc</sup> |                                 |
|             | CA               | 9           | 3.58 ± 0.23 <sup>c</sup>  |                                 |

Data are presented as mean ± standard error. An asterisk and the connecting letter report denotes the significant statistical difference between the means in each variant category determined using ANOVA, followed by mean comparisons using student's t-test at p<0.05.

<sup>a</sup>Variation explained by a given variant (first column) in OY1 expression. All the linear regression models were significant at p<0.001.

Table S23. The pairwise trait correlations between OY1 transcript abundance in the emerging shoots of maize inbred lines and the CCM traits of corresponding F<sub>1</sub> hybrids with *Oy1-N1989/oy1:B73* for the 198 inbred lines common between the current study and Kremling *et al.* 2018.

|              | OY1 (count) | WT_CCM I | MT_CCM I | Ratio_CCM I | WT_CCM II | MT_CCM II | Ratio_CCM II |
|--------------|-------------|----------|----------|-------------|-----------|-----------|--------------|
| OY1 (count)  |             | 0.110    | 0.219    | 0.196       | -0.075    | 0.169     | 0.191        |
| WT_CCM I     | 0.133       |          | 0.231    | 0.004       | 0.295     | 0.212     | 0.162        |
| MT_CCM I     | 0.003       | 0.001    |          | 0.967       | 0.154     | 0.865     | 0.853        |
| Ratio_CCM I  | 0.007       | 0.958    | <.0001   |             | 0.093     | 0.837     | 0.837        |
| WT_CCM II    | 0.303       | <.0001   | 0.030    | 0.194       |           | 0.209     | -0.007       |
| MT_CCM II    | 0.020       | 0.003    | <.0001   | <.0001      | 0.003     |           | 0.973        |
| Ratio_CCM II | 0.009       | 0.023    | <.0001   | <.0001      | 0.921     | <.0001    |              |

The upper half contains Pearson's correlation coefficient and the lower half contains correlation p-values for each pairwise trait comparison. Self-comparisons (diagonal) are left blank.

# Figures

*A Very Oil Yellow1* modifier of the *Oil Yellow1-N1989* allele uncovers a cryptic phenotypic impact of cis-regulatory variation in maize

Rajdeep S. Khangura, Sandeep Marla, Bala P. Venkata, Nicholas J. Heller, Gurmukh S. Johal, and Brian P. Dilkes

Figure 1. The chlorophyll pigment accumulation differs in severity for *Oy1-N1989/oy1* heterozygotes in the B73 and B73 x Mo17 hybrid backgrounds. The representative wild-type (*oy1/oy1*) and mutant (*Oy1-N1989/oy1*) sibling from (a) B73 x *Oy1-N1989/oy1*:B73 and (b) Mo17 x *Oy1-N1989/oy1*:B73 F<sub>1</sub> crosses in the field-grown plants. The measuring stick in panel a and b is 243 cm. (c) Non-destructive chlorophyll approximation in mutant and wild-type siblings at an ~3 weeks (CCMI) and ~6 weeks (CCMII) after planting; data for each class of genotype is derived from 39 replications planted in RCBD. The asterisk indicates statistical significance between the means in each genotype category at  $p < 0.01$  determined using student's t-test.

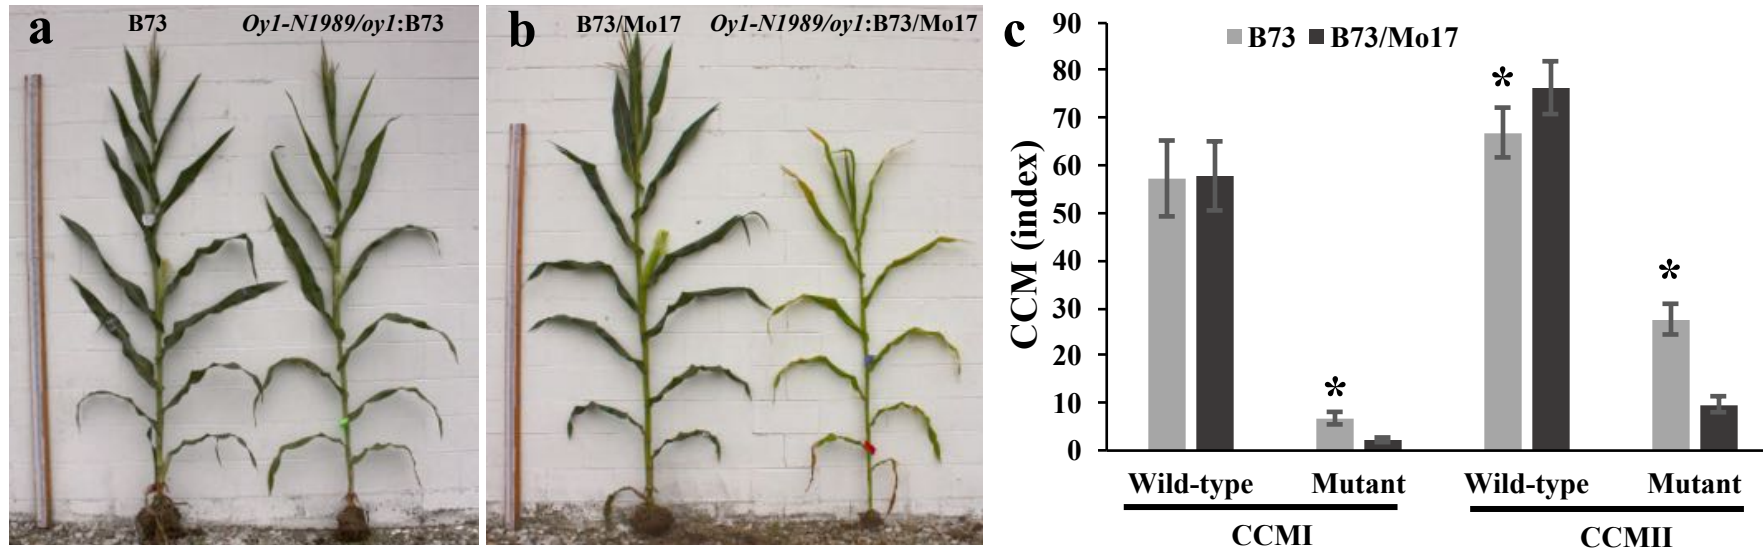

Figure 2. The crossing scheme used to map *Oy1-N1989* enhancer/suppressor loci in IBM and Syn10 populations. Red, blue and white colors indicate B73, Mo17, and missing genotypes. The heterozygous tester (*Oy1-N1989/oyl:B73*) shows chromosome 10 with a black dot indicating *Oy1-N1989* mutant allele. The F<sub>1</sub> progenies depicted here shows a hypothetical state of chromosome 10 for each F<sub>1</sub> progeny showing segregation of wild-type and mutant (with the black spot) siblings.

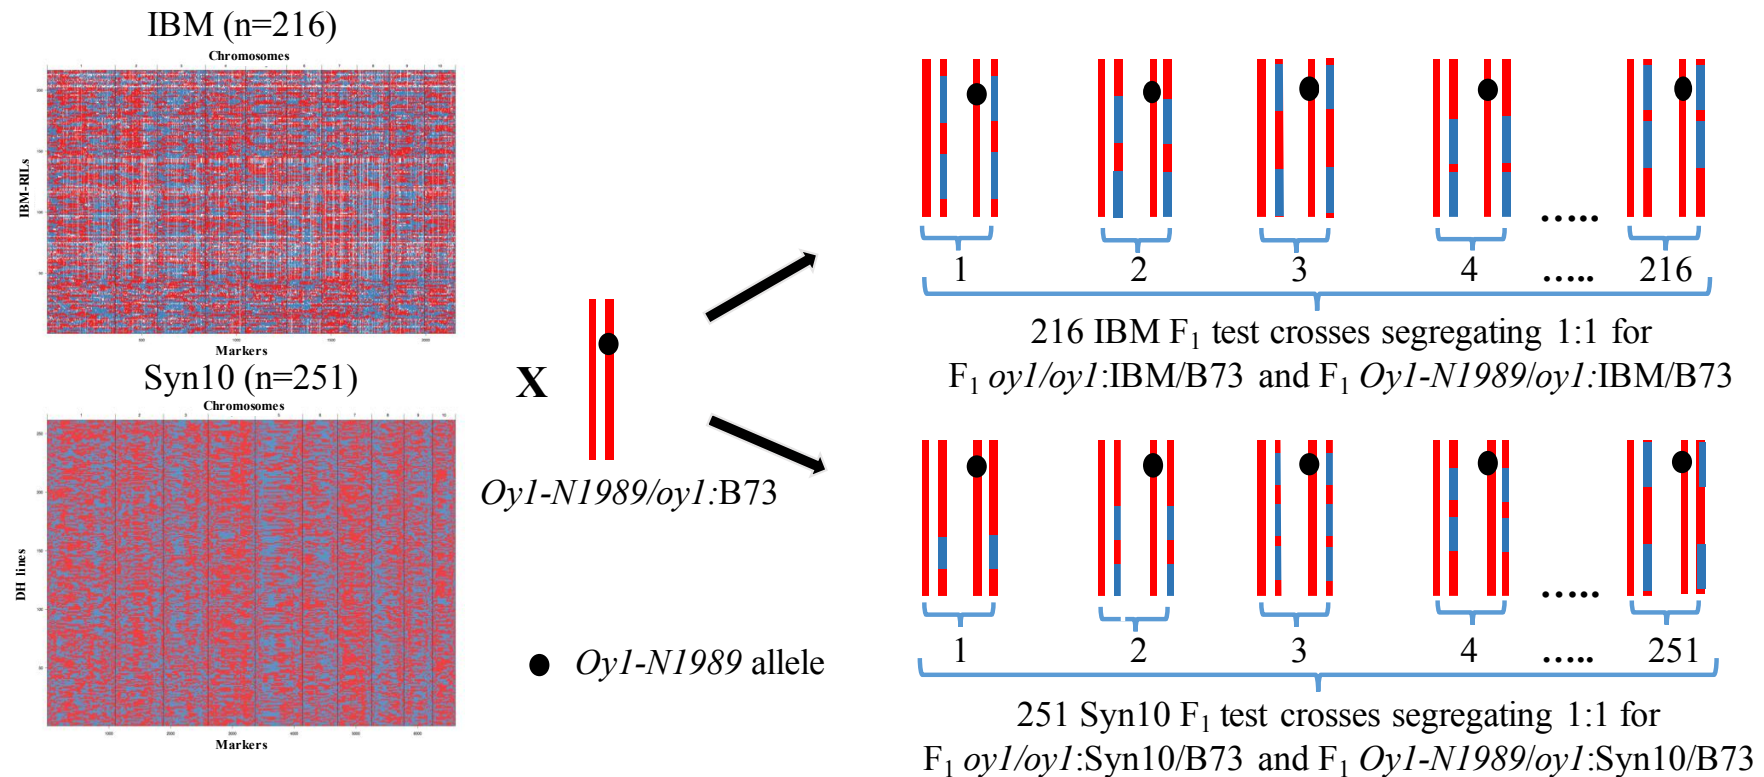

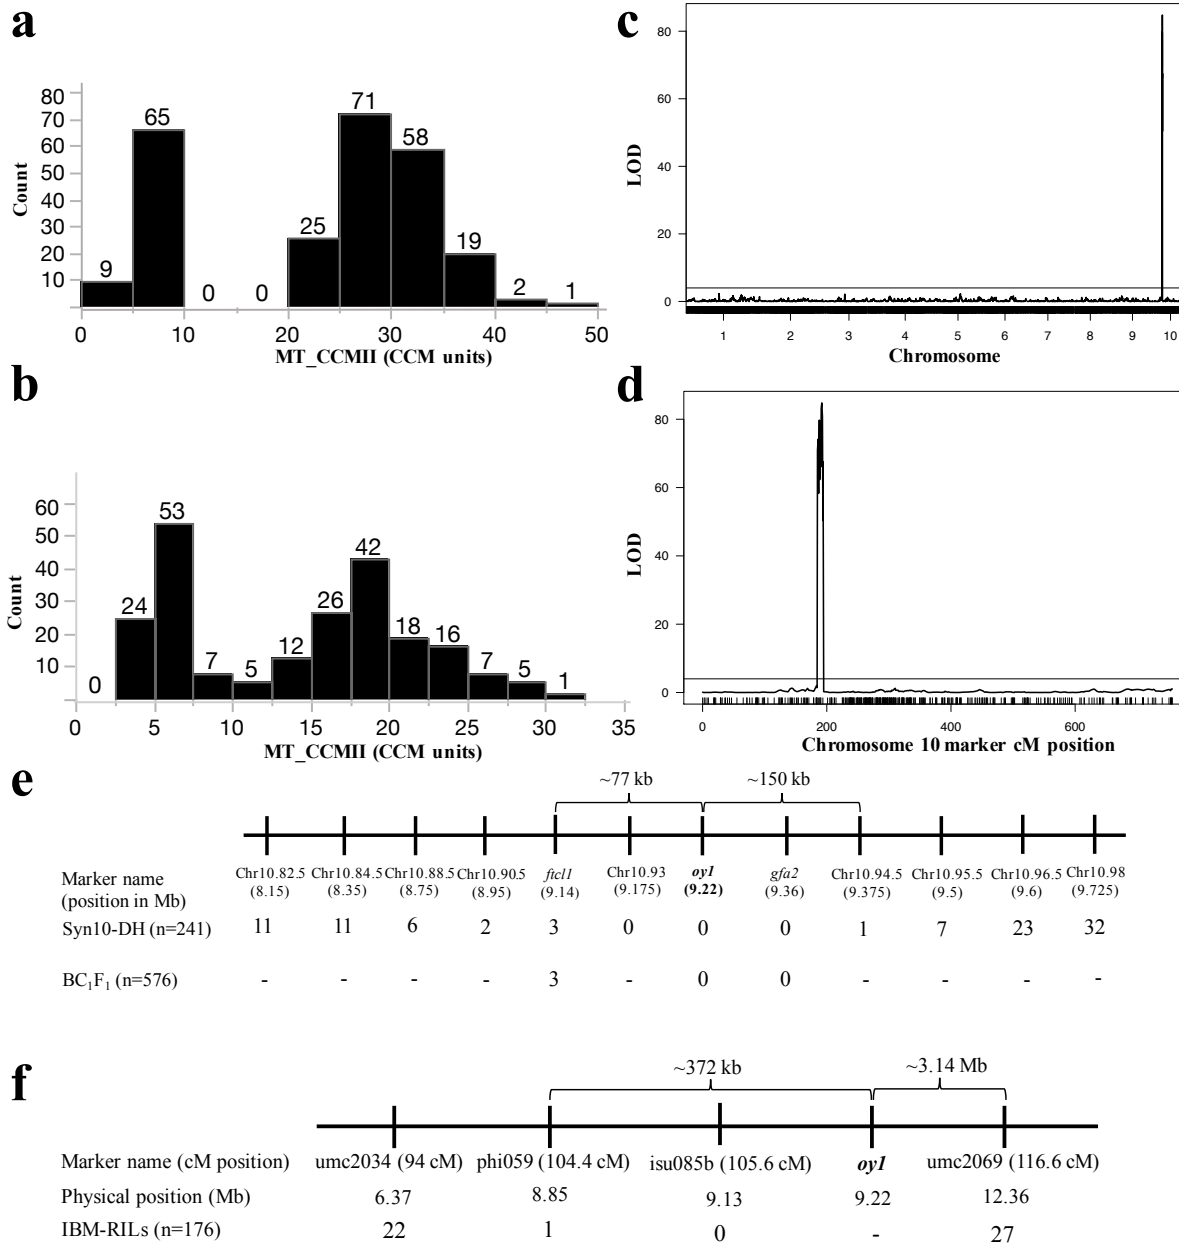

Figure 3. The phenotypic distribution, QTL analysis, and fine mapping results of MT\_CCMII trait. The distribution of MT\_CCMII in (a) Syn10 x *Oyl-N1989/oyl*:B73 F<sub>1</sub> population and (b) IBM x *Oyl-N1989/oyl*:B73 F<sub>1</sub> population. (c) Genome-wide QTL plot of MT\_CCMII in Syn10 x *Oyl-N1989/oyl*:B73 F<sub>1</sub> population. The x-axis indicates the chromosome number and Y-axis indicates the logarithm to the base 10 of odds (LOD) of tested markers. Black horizontal bar indicates the permutation testing-based threshold to declare statistical significance of the QTL. (d) Close-up view of the *vey1* locus on chromosome 10. The x-axis indicates the centiMorgan (cM) position of the molecular markers. Recombinants detected in F<sub>1</sub> crosses of *Oyl-N1989/oyl*:B73 as pollen-parent with (e) Syn10 lines and B73 x Mo17 F<sub>1</sub> (BC<sub>1</sub>F<sub>1</sub>), and (f) IBM. A number at a given marker and population intersection in (e) and (f) indicates the total number of recombinants between the respective marker genotype and phenotype; hyphen denotes no genotyping. dCAPS marker at *oyl* is highlighted in bold.



Figure 4. The Manhattan plots of SNPs associations with MT\_CCMII trait in MDL x *Oy1-N1989/oy1*:B73 F<sub>1</sub> populations. The genome-wide association of (a) MT\_CCMII, (b) MT\_CCMII using S10\_9161643 as a covariate. The close-up view of the region on chromosome 10 for (c) MT\_CCMII result shown in panel a, (d) MT\_CCMII results shown in panel b. Arrows in panels a-d identify the data point corresponding to SNPs S10\_9161643 and S10\_9179932. The horizontal red and hashed red lines in panels a-d indicates the genome-wide Bonferroni cut-off at  $p < 0.05$  and hashed golden line in panels c-d is the chromosome-wide FDR-adjusted threshold at  $p < 0.05$ . The linkage disequilibrium of all SNPs in a ~450 kb region around *oy1* with SNPs (e) S10\_9161643, and (f) S10\_9179932. Vertical lines in panels c-f from left to right represent the genomic position of *ftcl1*, *ereb28*, *oy1* (green), and *gfa2* loci.

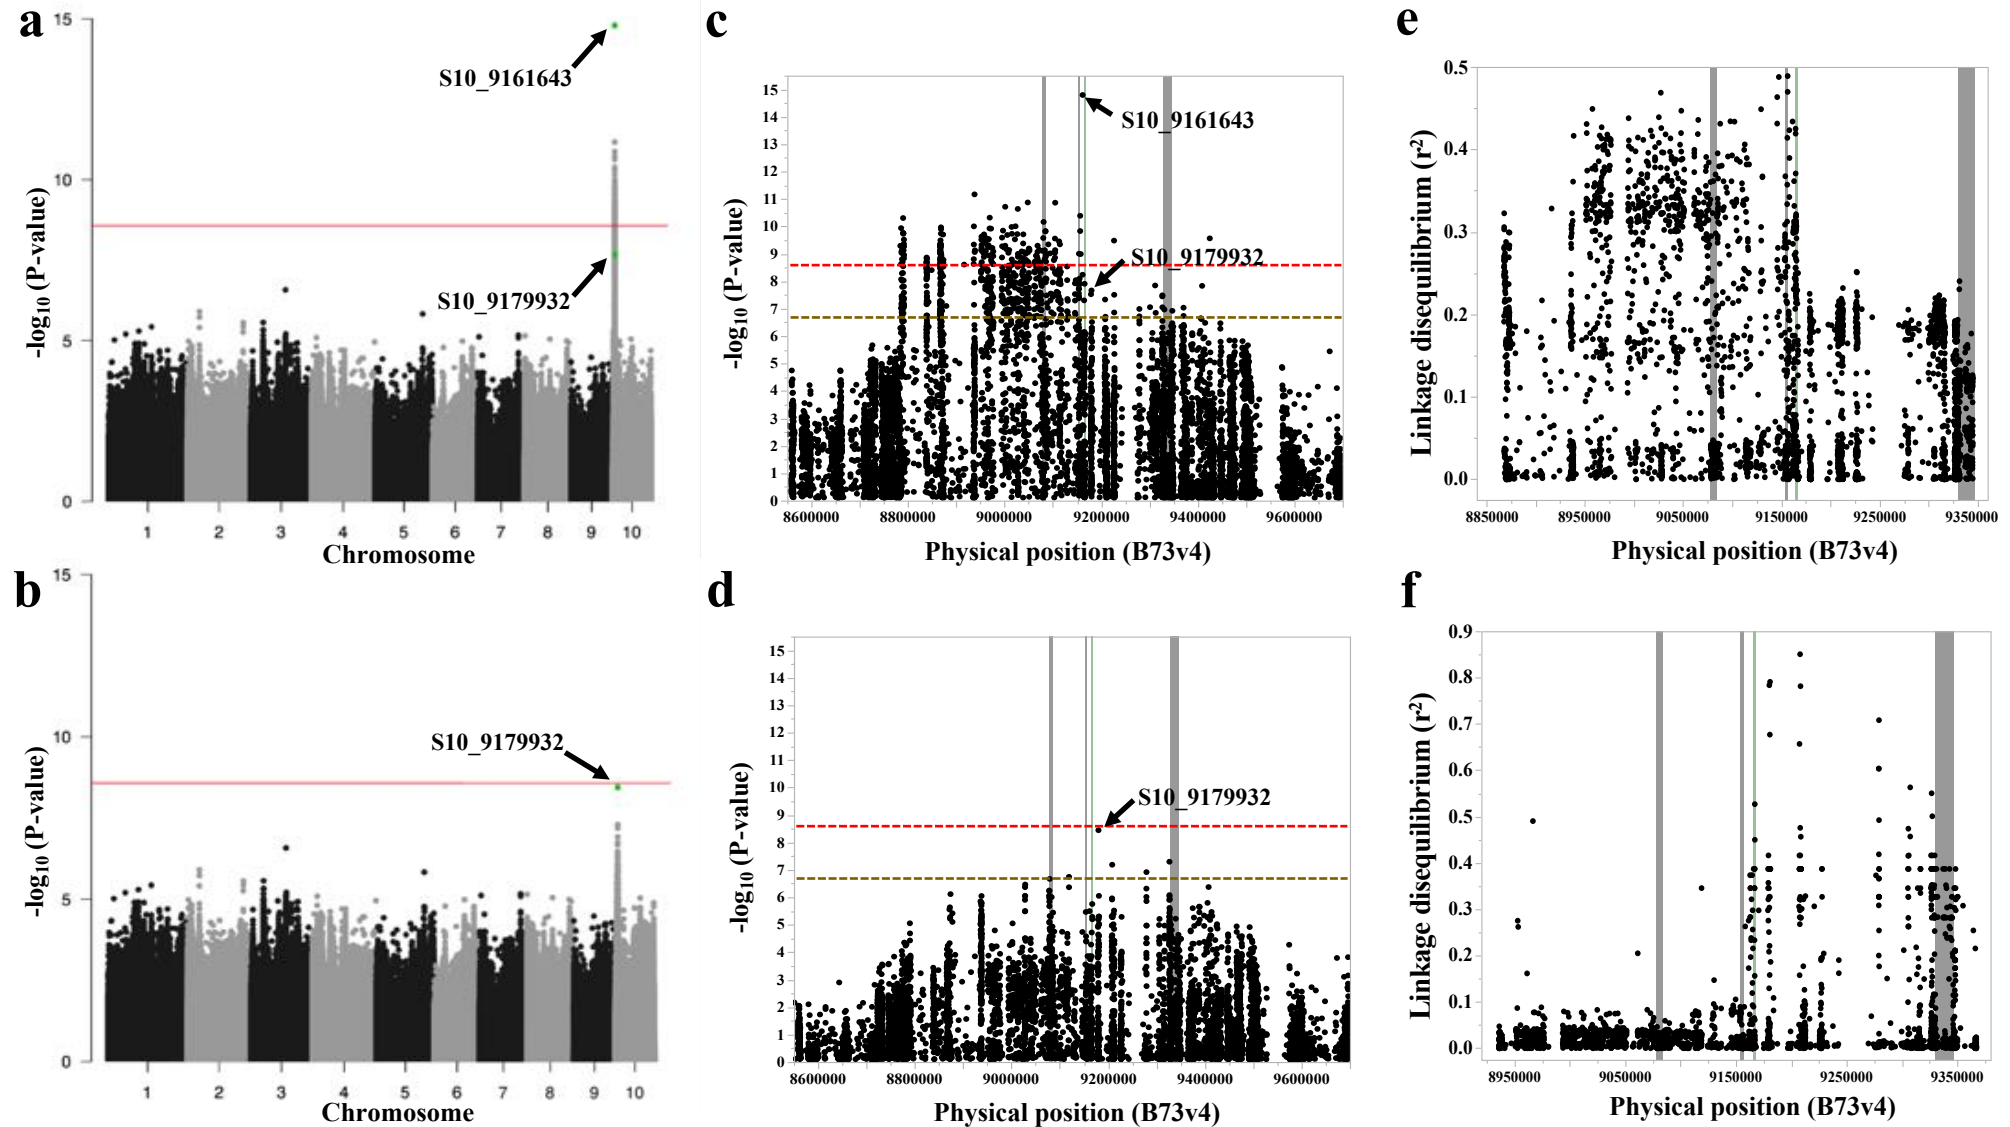

Figure 5. The single locus test of *oy1* showing the interaction between wild-type alleles of *oy1* from B73 and Mo17 with semi-dominant and recessive mutant alleles *Oy1-N1989* and *oy1-yg*, respectively. (a) Mutant (two severity groups) and wild-type individuals segregating in a cross (B73 x *oy1-yg/oy1-yg*) x *Oy1-N1989/oy1*:B73. White-fill arrows indicate *Oy1-N1989/oy1* plants (pale-green and suppressed), whereas yellow-fill arrows indicate *Oy1-N1989/oy1-yg* (yellow-green and severe) plants. The CCM measurements of testcrosses at 21 and 40 days after planting in the (b) mutant siblings (*Oy1-N1989/oy1-yg* and *Oy1-N1989/+*) of (Mo17 x *oy1-yg/oy1-yg*) x *Oy1-N1989/+*:B73, and (B73 x *oy1-yg/oy1-yg*) x *Oy1-N1989/+*:B73 crosses, (c) mutant (*oy1-yg/oy1-yg*) and wild-type (*oy1-yg/+*) siblings of (Mo17 x *oy1-yg/oy1-yg*) x *oy1-yg/oy1-yg* and (B73 x *oy1-yg/oy1-yg*) x *oy1-yg/oy1-yg* crosses. Asterisks in panel b-c indicate the significant difference of mean between the genotypes in a given cross at  $p < 0.01$  determined using student's t-test. Check supplemental information for details.

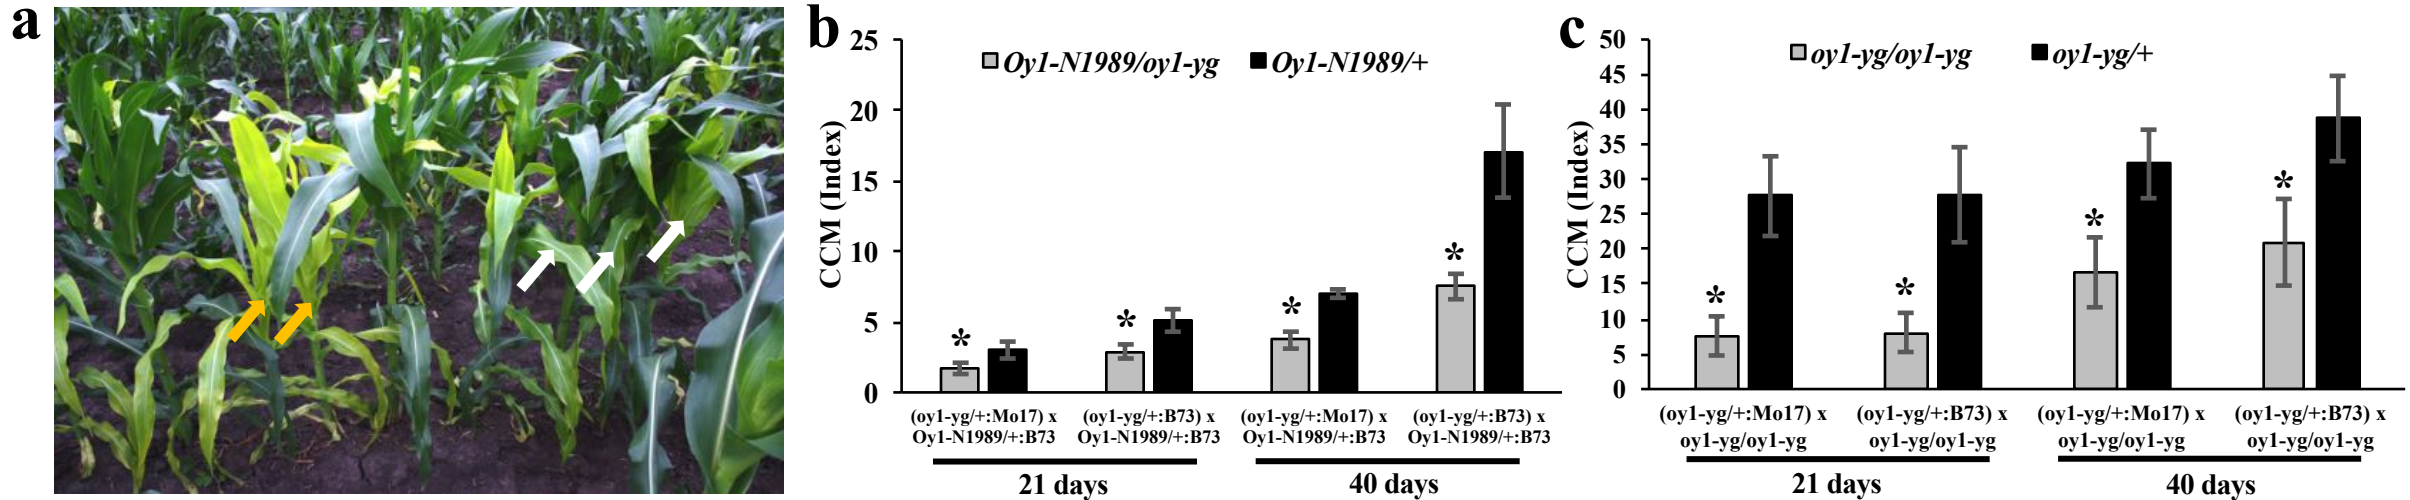

Figure 6. The distributions of CCM trait measurements in the F<sub>1</sub> progenies of a sub-set of maize inbred lines crossed with *Oy1-N1989/oy1:B73* at three allelic variants in the *oy1* coding sequence identified in respective inbred lines. The phenotypic distribution of (a) MT\_CCMI, (b) WT\_CCMI, (c) MT\_CCMII, and (d) WT\_CCMII. Symbols “-”, “AS”, and “AT” on the X-axis denote deletion of 6 base pairs (bp), insertion of amino acid residues Alanine-Serine (AS), and Alanine-Threonine (AT), respectively. Three inbred lines including B73 carried “-” allele, six inbred lines carried “AS” insertion, nine inbred lines carried “AT” insertion. No statistically significant difference was found among the three distributions in all panels using ANOVA. Check the supplemental information for more details.

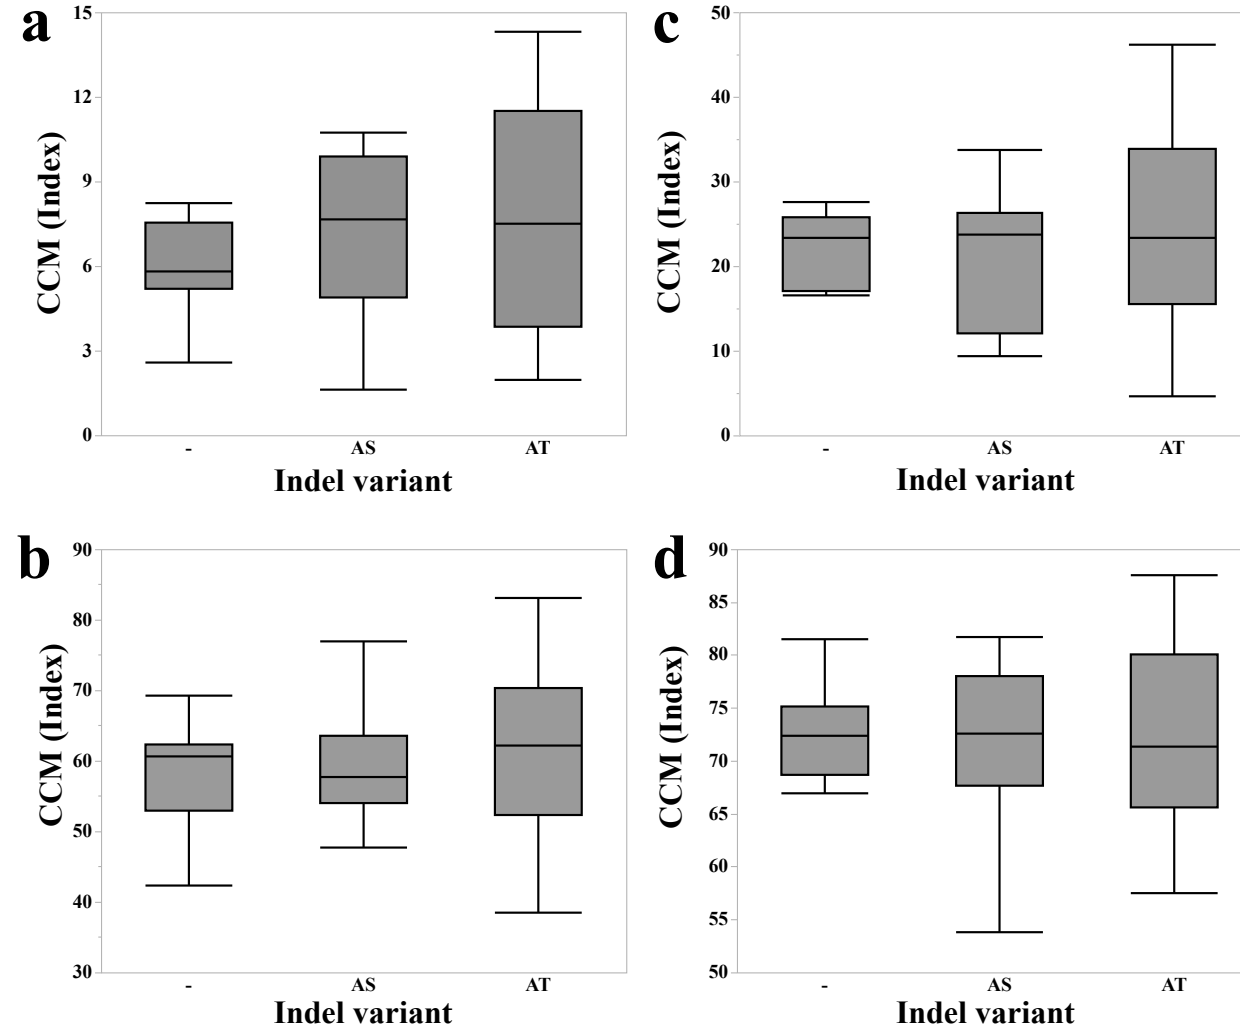

Figure 7. Expression of OY1 in the shoot apices of 14 days old IBM seedlings co-segregates with *vey1*. (a) Genotypic distribution of OY1 RPKM (X-axis) at the marker *isu085b* (linked to *vey1*). An asterisk indicates the significant difference in the mean between two groups using Student's t-test at  $p < 0.01$ . The linear regression of OY1 expression in IBM on CCMII in the (b) wild-type and (c) mutant siblings derived from IBM x *Oy1-N1989/oy1*:B73 crosses.

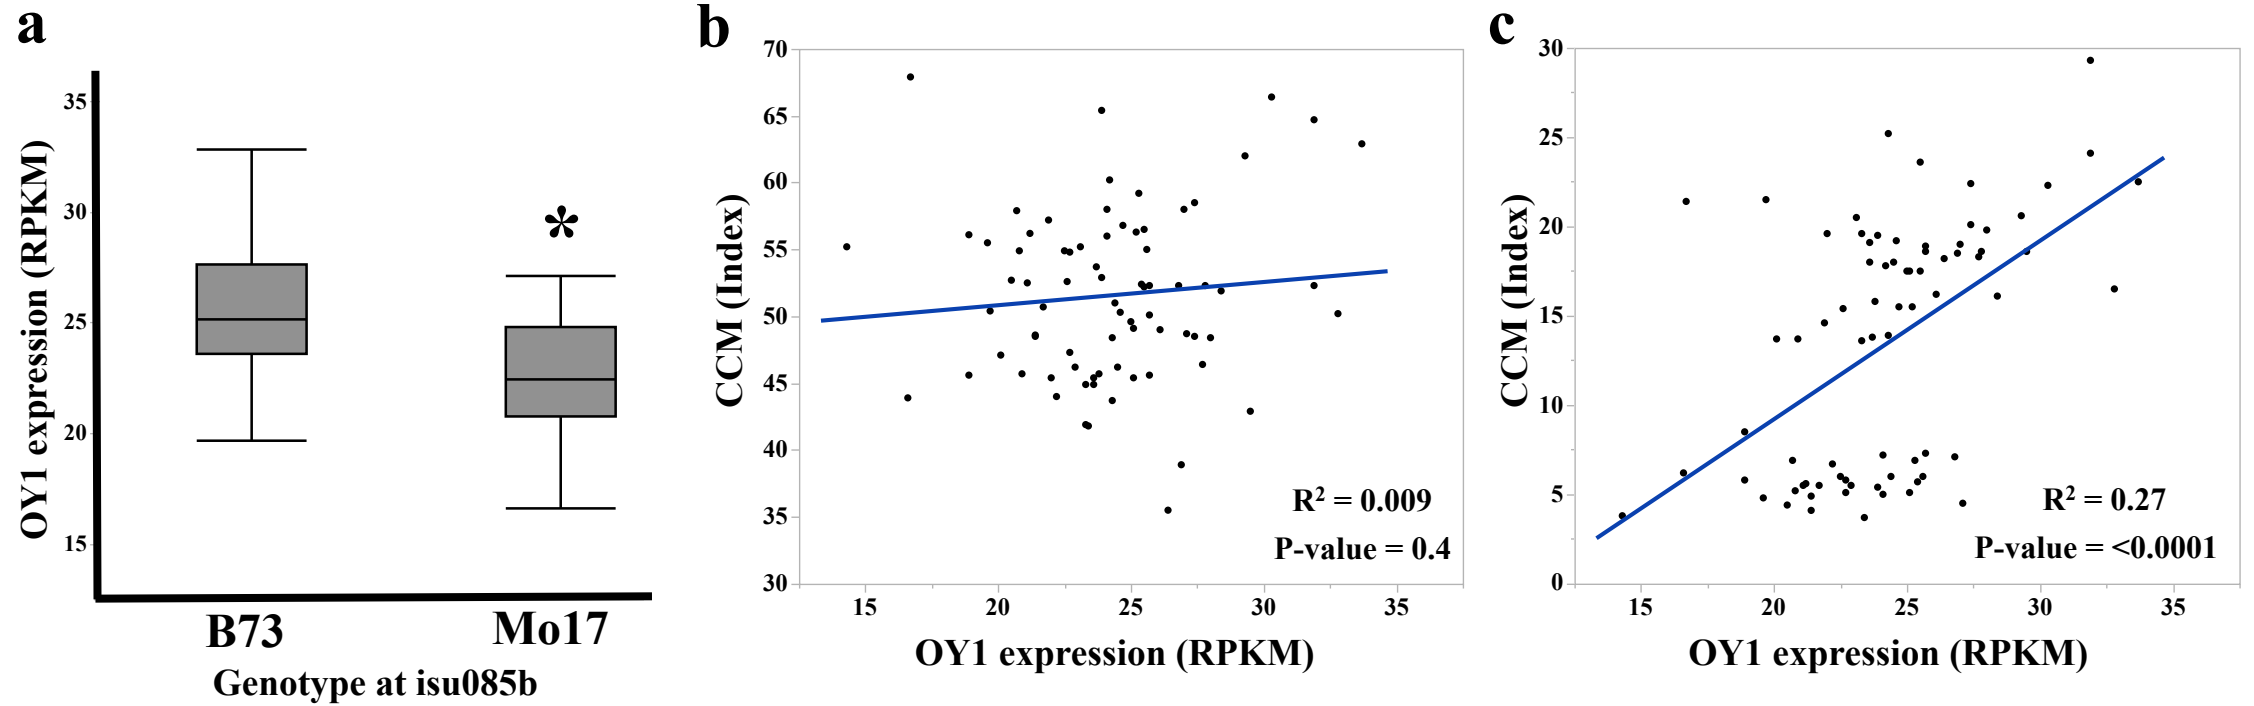

# Supplemental Figures

Figure S1. The linear regression of the chlorophyll pigment measurements using non-destructive CCM-200 plus meter (expressed as CCM index) and absolute chlorophyll pigment quantification using the spectrophotometric method from the same leaf. The linear fit of CCM readings with (a) Chlorophyll *a* (Chl*a*), (b) Chlorophyll *b* (Chl*b*), (c) Total chlorophyll, (d) Chlorophyll *a/b* ratio (chl*a/b* ratio). The absolute amount of chl*a*, chl*b*, and total chlorophyll was quantified using the spectrophotometer; expressed as mg/g fresh weight (FW).

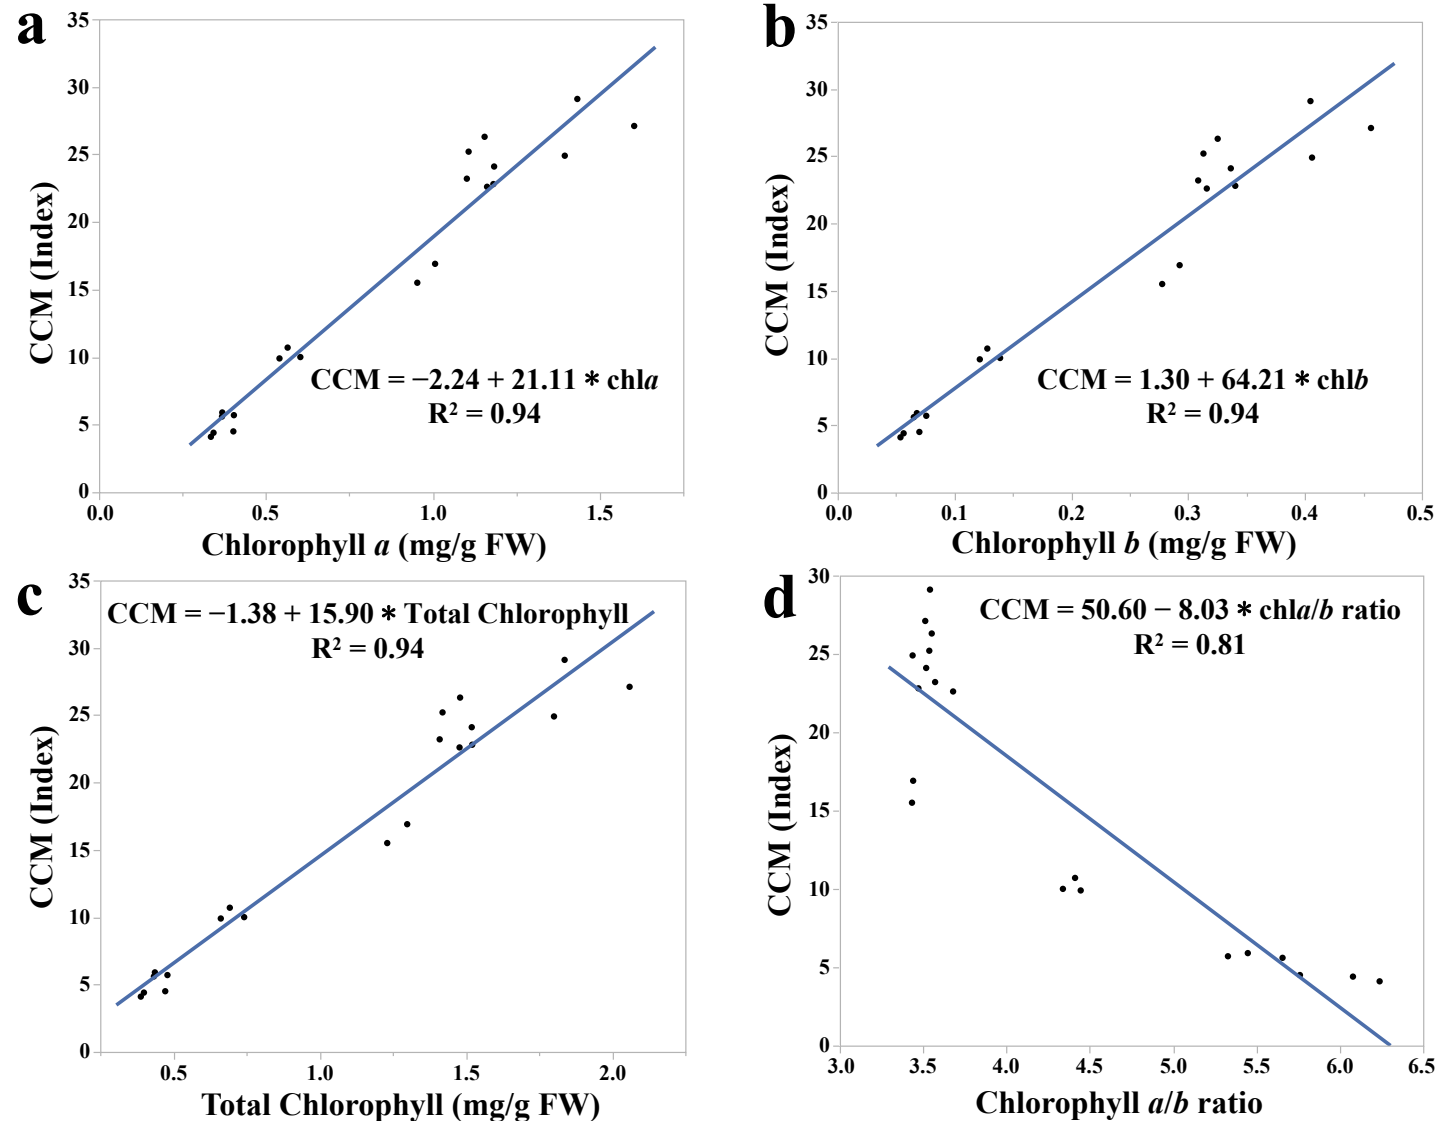

Figure S2. The CCM quantification of the (a) mutant (*Oy1-N1989/oy1*), and (b) wild-type (*oy1/oy1*) siblings in B73, Mo17 x B73, and Mo17 (BC<sub>6</sub> generation) genetic background at 30 days after planting. Data were derived from three randomized replications grown in the field for each cross. CCM was quantified on the top fully-expanded leaf from multiple plants (2-4) for each genotype (mutant and wild-type). Connecting letter report indicates statistical significance determined using ANOVA followed by the mean comparison between all three genotypes with Tukey's HSD (post-hoc test) at p<0.01.

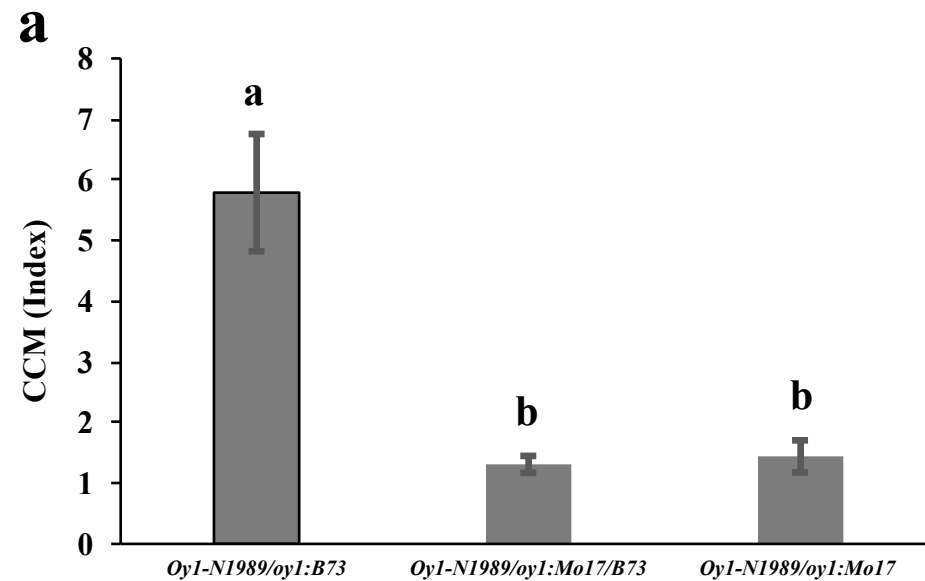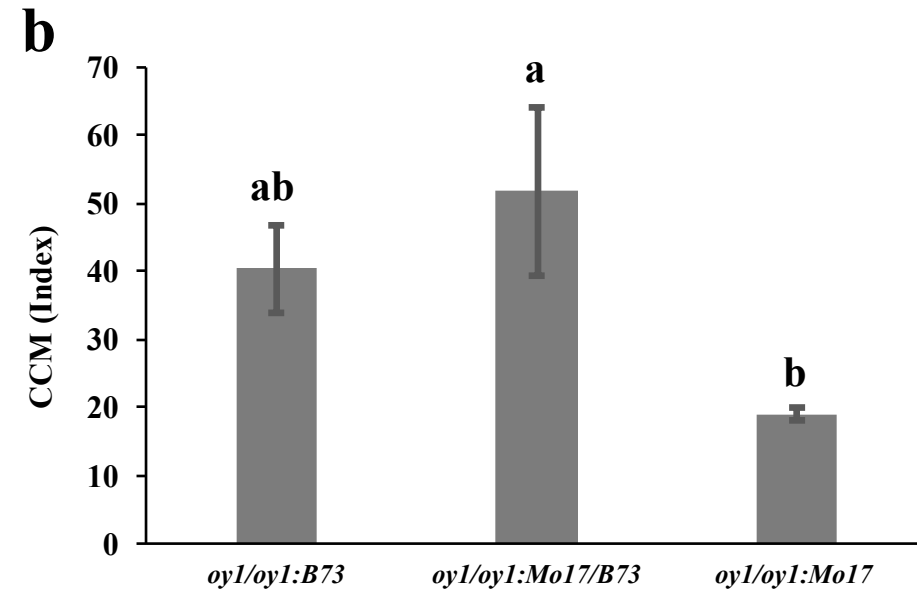

Figure S3. The pairwise scatter plot of primary trait measurements in IBM x *Oy1-N1989/oy1:B73* F<sub>1</sub> populations.

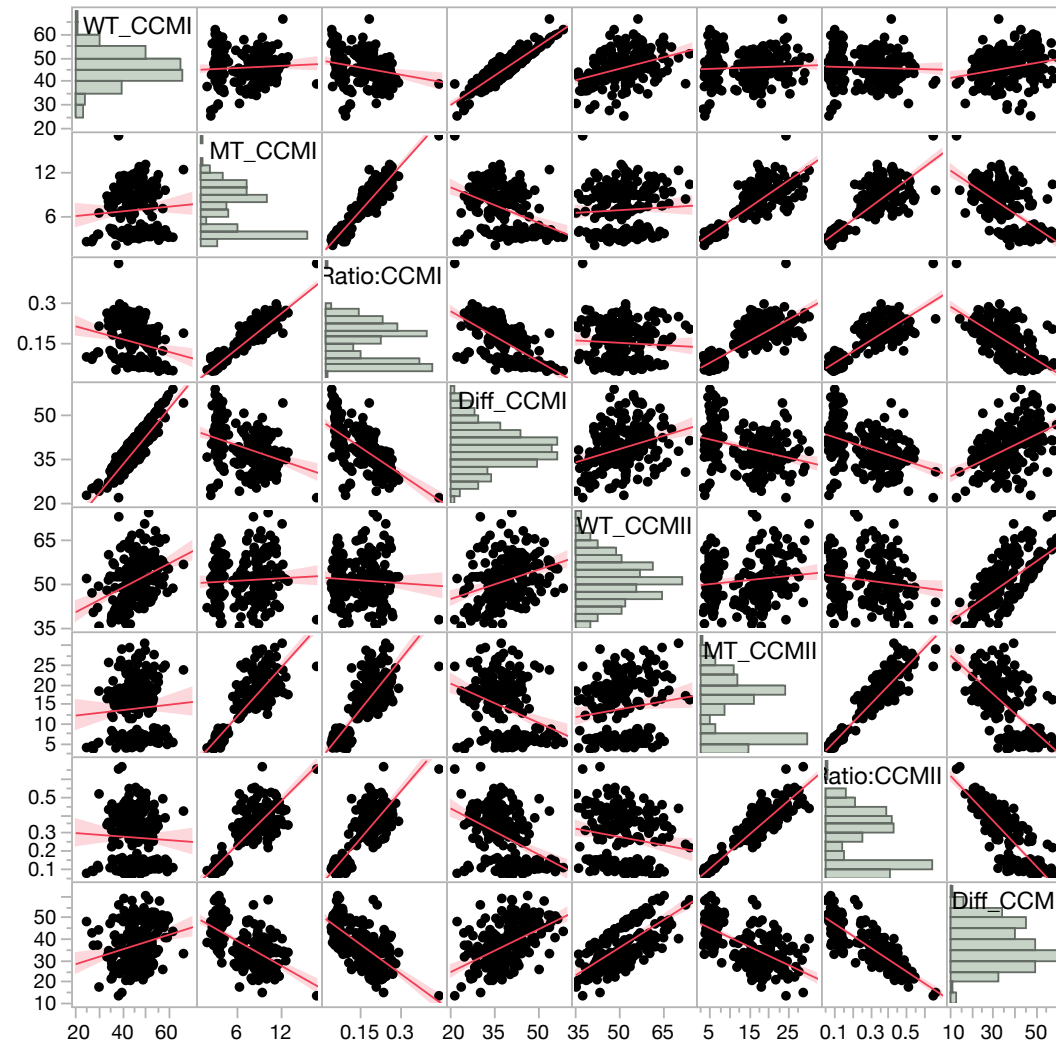



Figure S4. The pairwise scatter plot of primary trait measurements in Syn10 x *Oy1-N1989/oy1*:B73 F<sub>1</sub> populations.

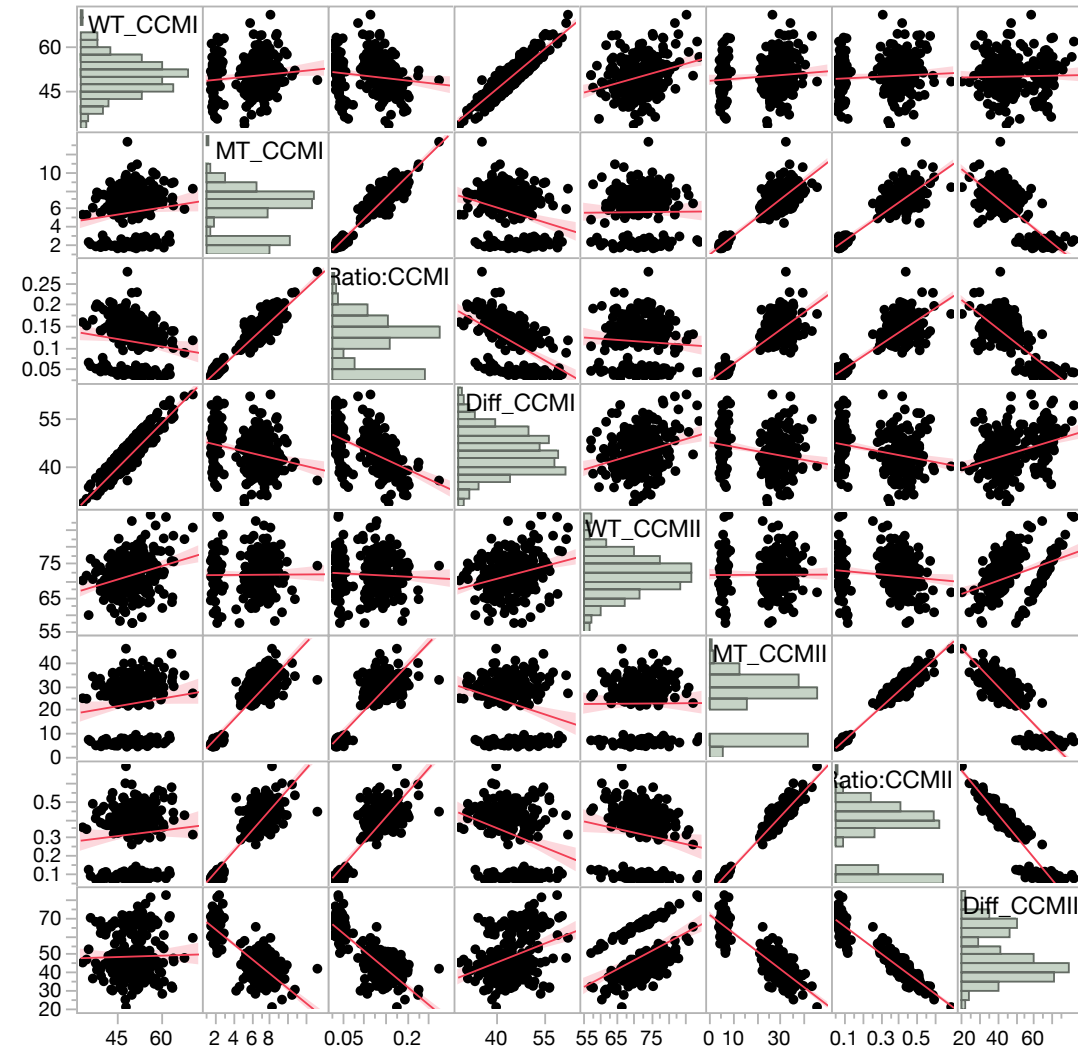

Figure S5. The CCMI and CCMII distribution in the wild-type (WT) and mutant (MT) siblings of (a) IBM x *Oy1-N1989/oy1:B73* F<sub>1</sub> populations, (b) Syn10 x *Oy1-N1989/oy1:B73* F<sub>1</sub> populations, and (c) MDL x *Oy1-N1989/oy1:B73* F<sub>1</sub> populations.

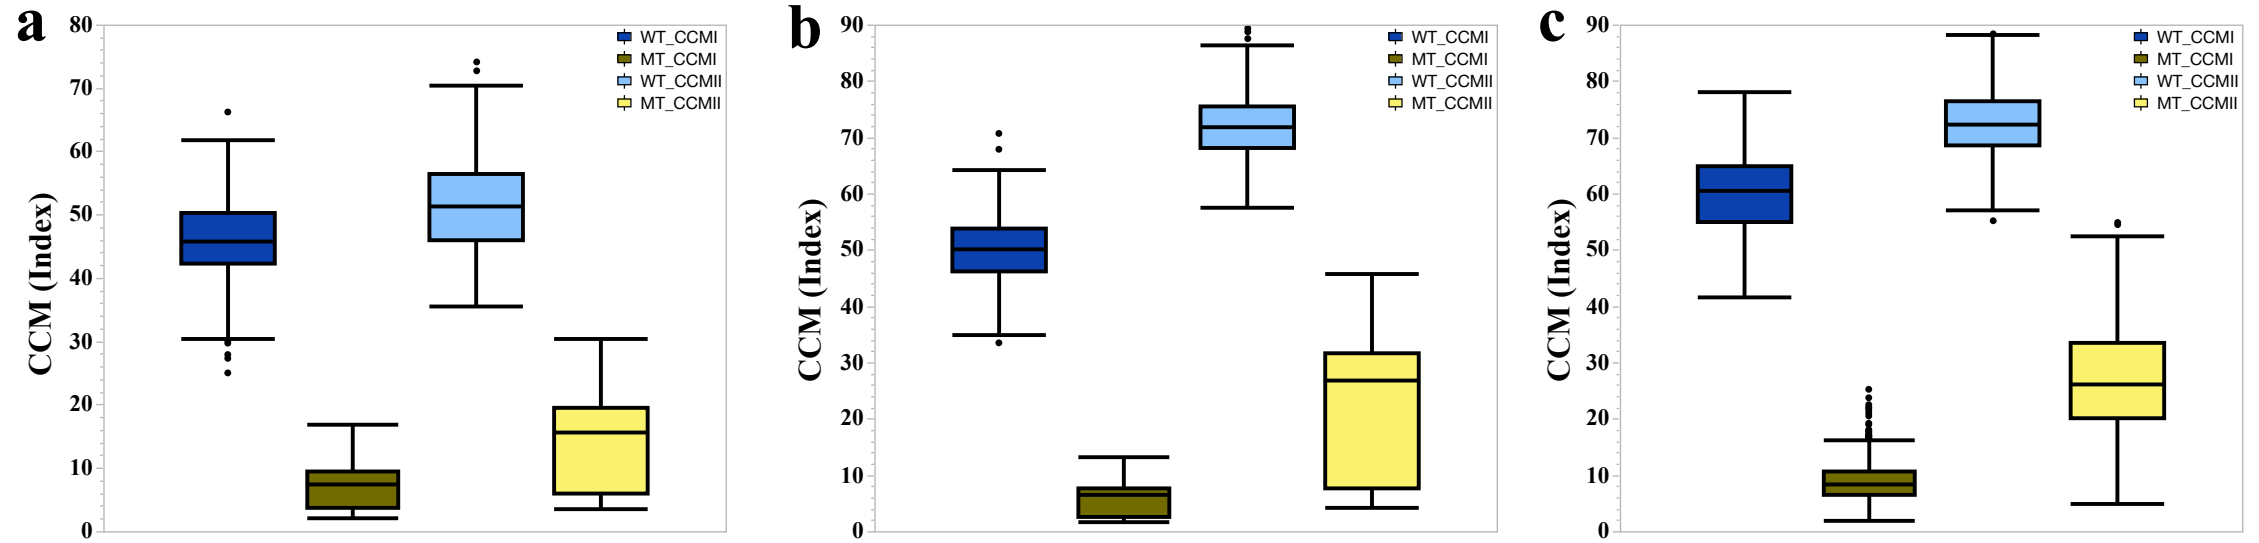

Figure S6. The cartoon showing *vey1* validation in BM-NILs x *Oy1-N1989/oy1:B73* F<sub>1</sub> populations. The first column shows the female parent of each cross, Colored figure shows the genotypes (B73, Mo17, Heterozygous, and missing colored as blue, golden, grey and white respectively) at a given SNP position (X-axis of the left figure; physical position from B73 RefGen v2); and position of *oy1* locus (between the two SNPs that are highlighted by a black arrow). The average (five replications) of CCM trait values in mutant siblings and their ratios (mutant/wild-type) are shown on the extreme right (last four columns) of the figure. The parental (B73 and Mo17) crosses with *Oy1-N1989/oy1:B73* that were planted as checks in this experiment are shown in the first two rows for comparison.

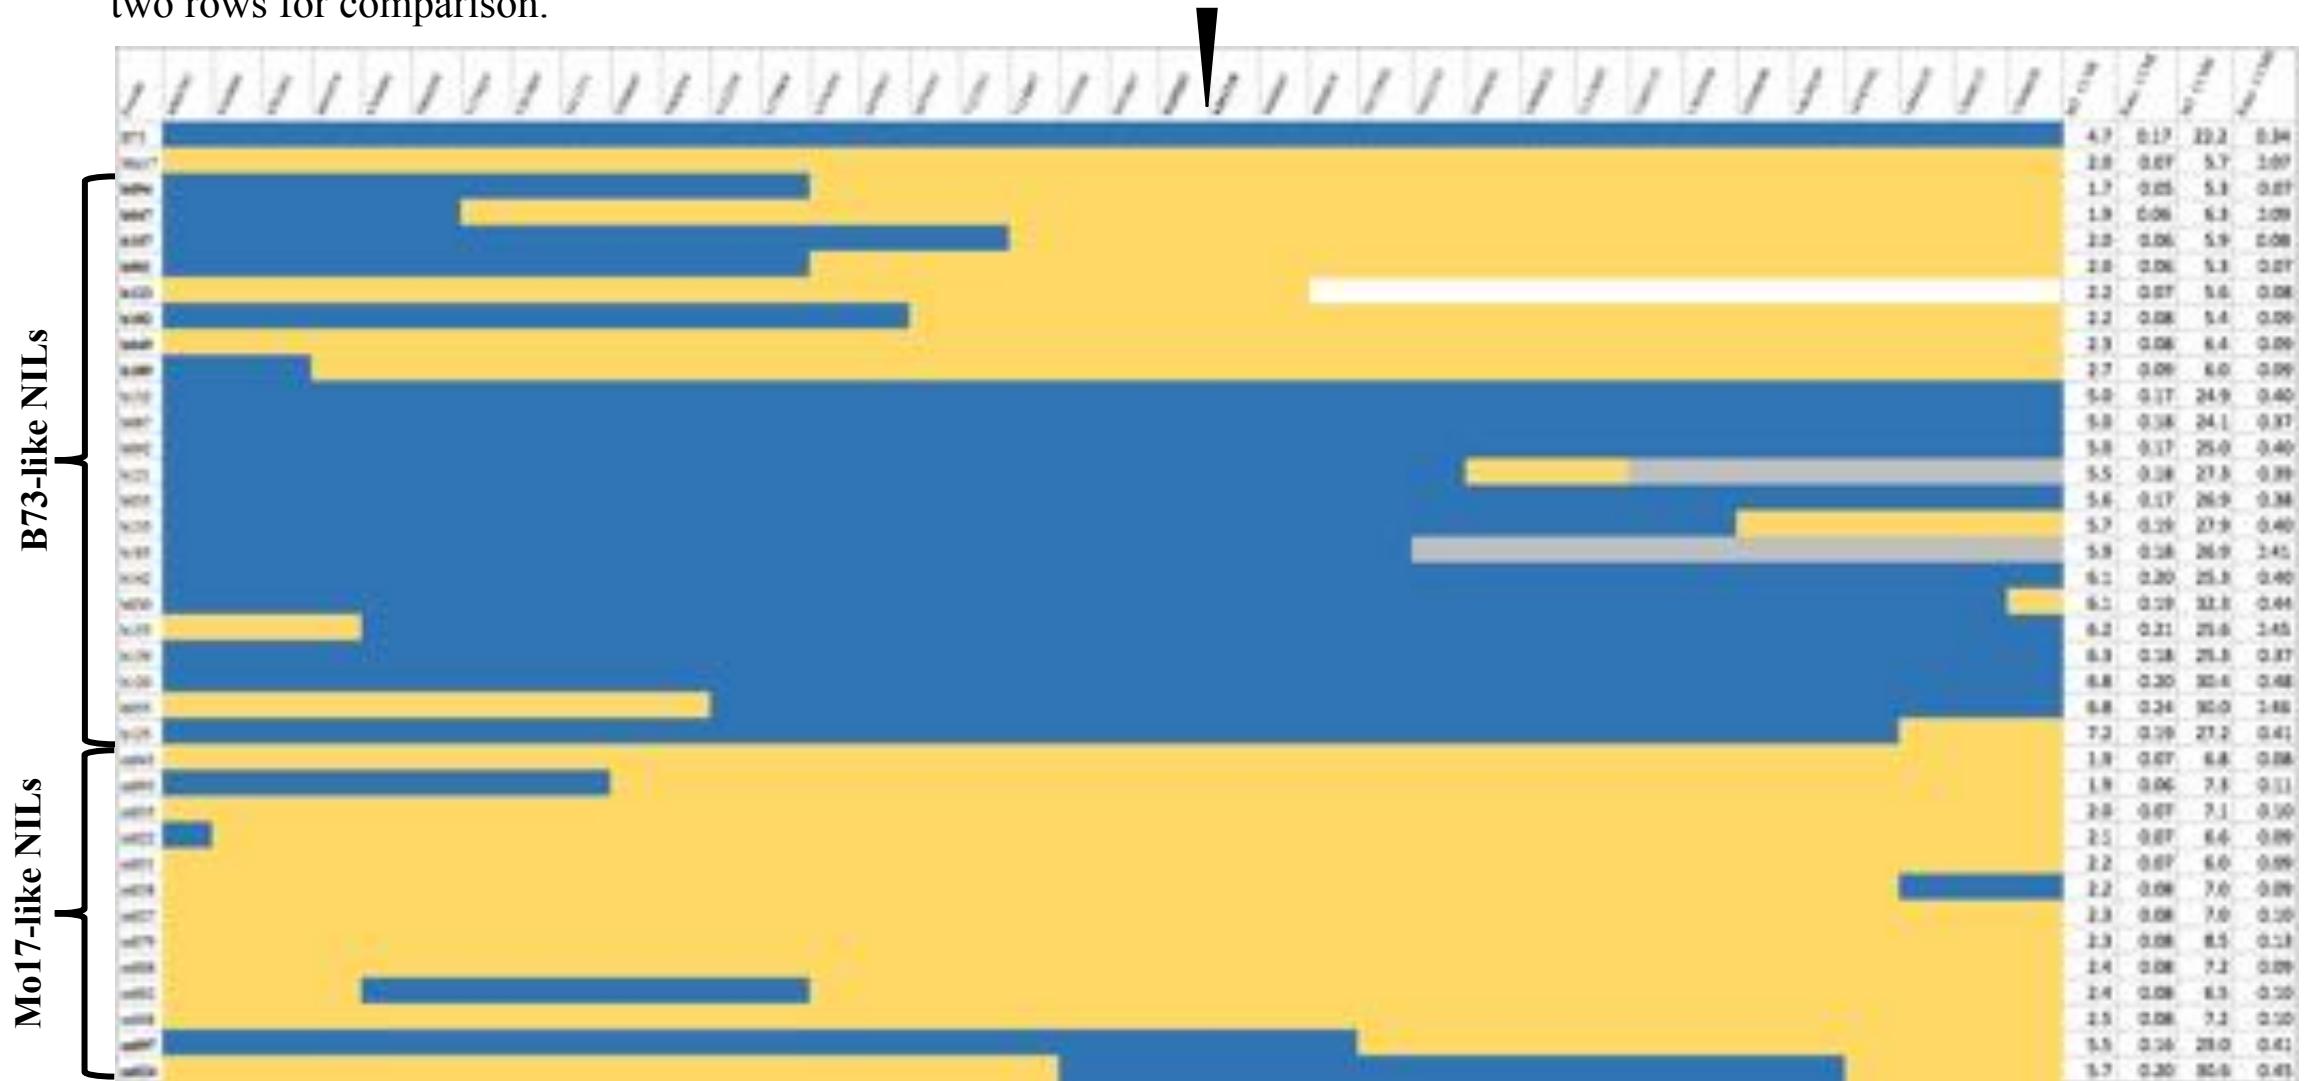

Figure S7. The pairwise scatter plot of primary trait measurements in MDL x *Oy1-N1989/oy1:B73* F<sub>1</sub> populations.

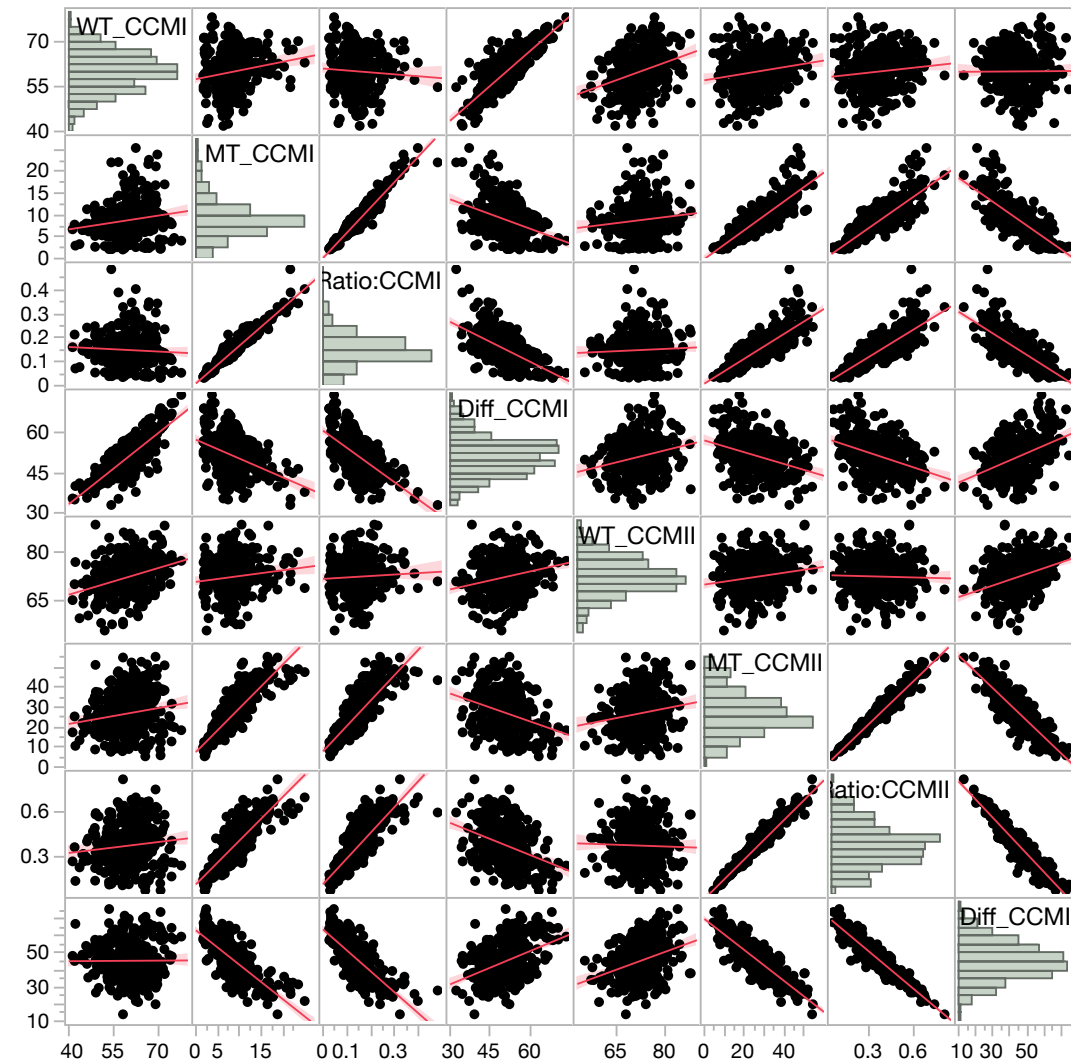

Figure S8. The chlorophyll approximation (using CCM) from the middle of the third leaf in the greenhouse grown F<sub>1</sub> maize seedlings from a cross of B73, Mo17, and PH207 inbred lines (ear-parents) with *Oy1-N1989/oy1*:B73 plants (pollen-parent) at the V3 developmental stage. The CCM values are presented as mean with standard deviation (error bars). The connecting letter report indicates the statistical significance calculated using ANOVA with post-hoc analysis using Tukey's HSD with  $p < 0.05$  among all genotypes. The sample size (n) for each genotype group varied from five to eight plants. Check supplemental table for details.

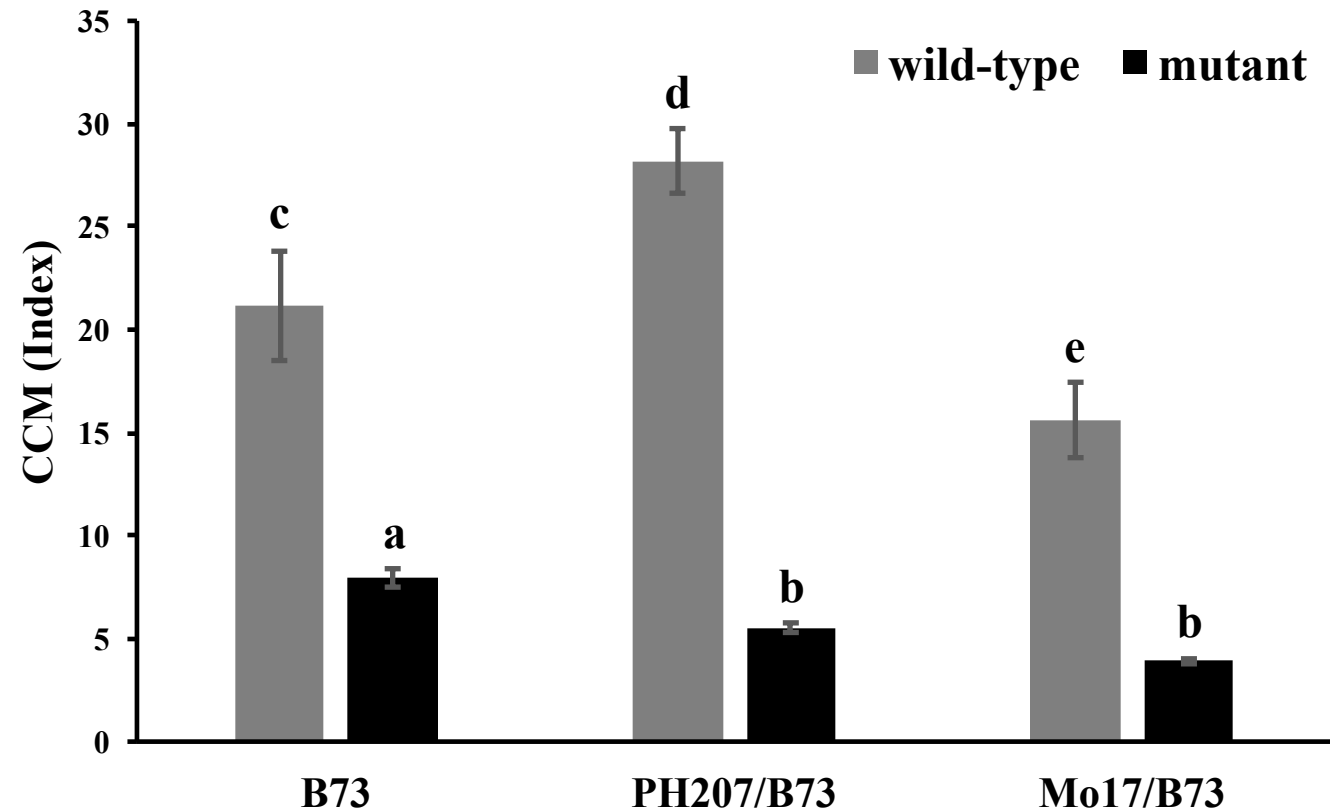

Figure S9. The proposed model for cis-acting regulatory variation as the basis of *vey1*.

Cis-eQTL in IBM

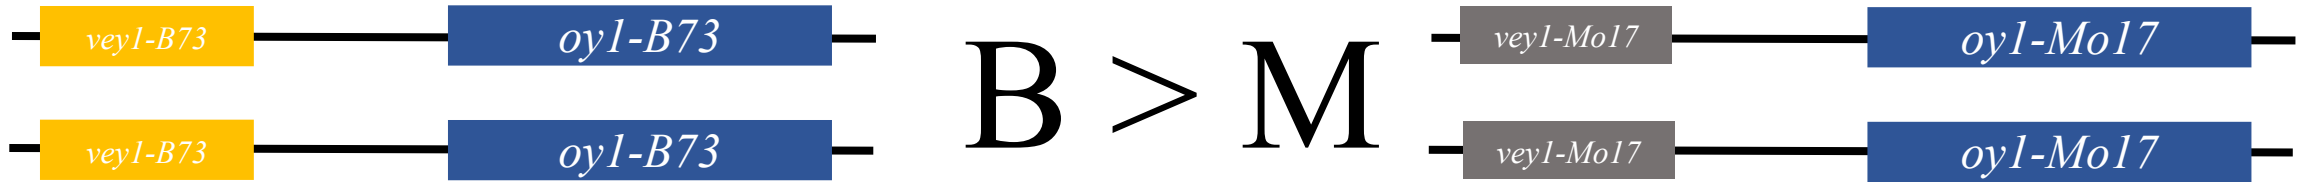

Allele-specific expression in B73 x Mo17 F<sub>1</sub> hybrid

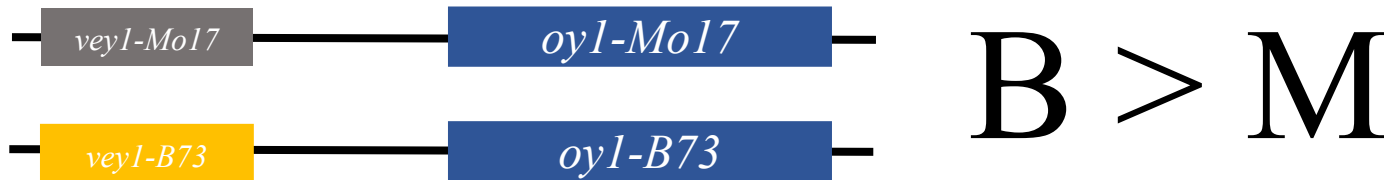

Allele-specific expression in reciprocal crosses of Mo17 with *Oy1-N1989/oy1*:B73

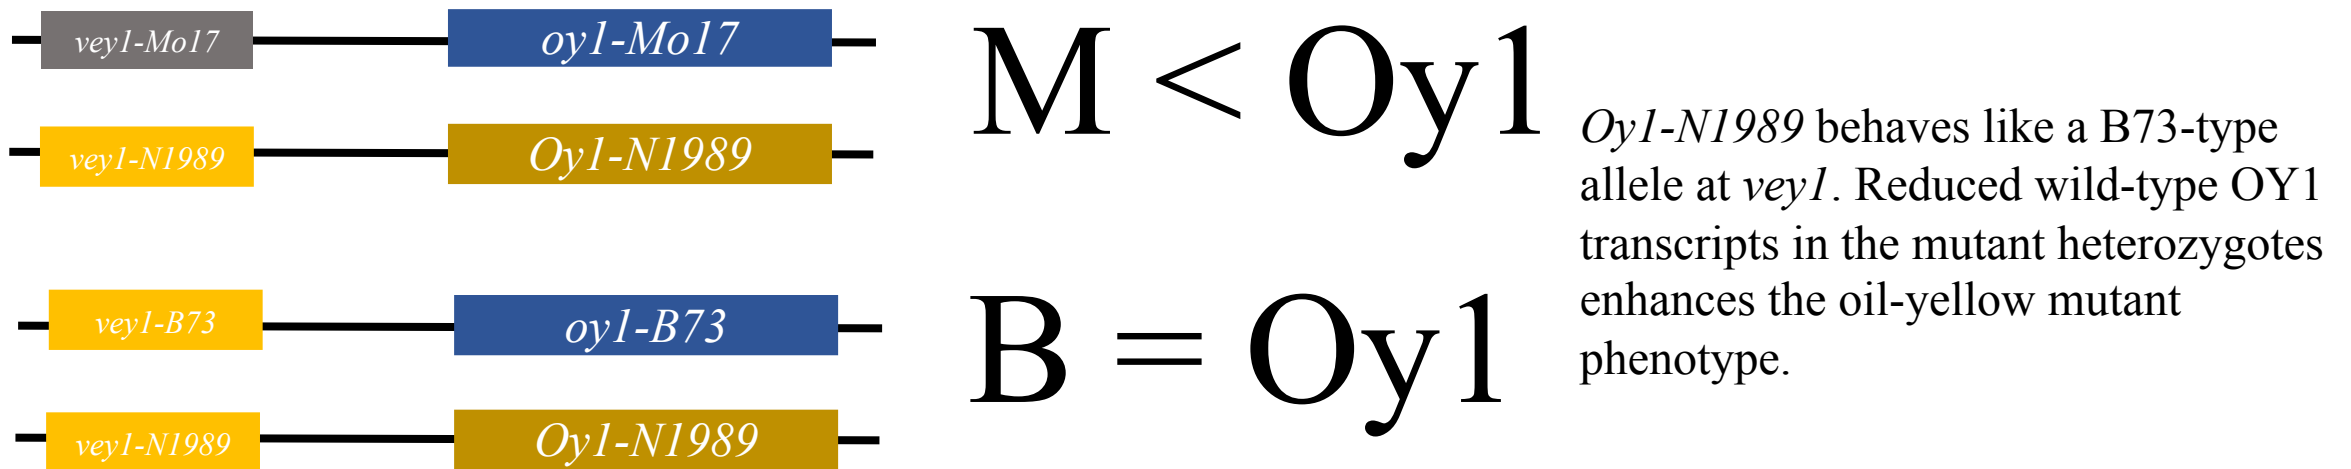

Source: http://biorxiv.org/content/10.1101/230375v2.full.pdf
